# Supplementary material for: Outcomes after perioperative SARS-CoV-2 infection in patients with proximal femoral fractures: an international cohort study
Source: PubMed Central journal article supplement (PMC8634634; doi:10.1136/bmjopen-2021-050830), 2021-11-30

1 **Supplementary Material**

2

3

4

5 **Table S1. Baseline characteristics (sex, age, ASA grade, cardiac risk, time of diagnosis, method of diagnosis and month study participant**  
 6 **recruited) of the full study population (n = 1063), and died (n = 313) and alive (n =746) groups; p-values are for Fisher's exact tests**  
 7 **comparing groups for each characteristic.**

8

| Characteristic                       | Full<br>(n = 1063) | Alive<br>(n = 746) | Died<br>(n = 313) | Died (%) |
|--------------------------------------|--------------------|--------------------|-------------------|----------|
| <i>Sex (p-value = &lt;0.001 ***)</i> |                    |                    |                   |          |
| Female                               | 696 (65.5%)        | 526                | 168               | 24.2     |
| Male                                 | 367 (34.5%)        | 220                | 145               | 39.7     |
| Missing                              | 0 (0.0%)           | 0                  | 0                 | 0.0      |
| <i>Age (p-value = 0.001 **)</i>      |                    |                    |                   |          |
| 20-29 years                          | 3 (0.3%)           | 3                  | 0                 | 0.0      |
| 30-39 years                          | 2 (0.2%)           | 1                  | 1                 | 50.0     |
| 40-49 years                          | 4 (0.4%)           | 3                  | 1                 | 25.0     |
| 50-59 years                          | 24 (2.3%)          | 21                 | 3                 | 12.5     |
| 60-69 years                          | 50 (4.7%)          | 39                 | 11                | 22.0     |
| 70-79 years                          | 189 (17.8%)        | 145                | 43                | 22.9     |
| 80-89 years                          | 507 (47.7%)        | 360                | 144               | 28.6     |
| 90+ years                            | 284 (26.7%)        | 174                | 110               | 38.7     |
| Missing                              | 0(0.0%)            | 0                  | 0                 | 0.0      |
| <i>ASA (p-value = 0.001 **)</i>      |                    |                    |                   |          |
| 1-2                                  | 151 (14.2%)        | 123                | 28                | 18.5     |
| 3-5                                  | 899 (84.6%)        | 615                | 281               | 31.4     |
| Missing                              | 13(1.2%)           | 8                  | 4                 | 30.8     |

|                                               |             |     |     |       |
|-----------------------------------------------|-------------|-----|-----|-------|
| <i>Cardiac risk (p-value = &lt;0.001 ***)</i> |             |     |     |       |
| 0                                             | 487 (45.8%) | 372 | 114 | 23.5  |
| 1                                             | 349 (32.8%) | 238 | 110 | 31.6  |
| 2                                             | 169 (15.9%) | 106 | 61  | 36.5  |
| 3                                             | 44 (4.1%)   | 23  | 21  | 47.7  |
| 4                                             | 8 (0.8%)    | 5   | 3   | 37.5  |
| 5                                             | 1 (0.1%)    | 0   | 1   | 100.0 |
| Missing                                       | 5 (0.47%)   | 2   | 3   | 60.0  |
| <i>Time of diagnosis (p-value = 0.006 **)</i> |             |     |     |       |
| Post-op                                       | 733 (69%)   | 499 | 231 | 31.6  |
| Pre-op                                        | 266 (25%)   | 205 | 60  | 22.6  |
| Missing                                       | 64 (6.0%)   | 42  | 22  | 34.4  |
| <i>Diagnosis (p-value = 0.668)</i>            |             |     |     |       |
| Clinical                                      | 62 (5.8%)   | 42  | 20  | 32.3  |
| Swab                                          | 992 (93.3%) | 696 | 292 | 29.6  |
| Missing                                       |             |     |     |       |
| <i>Month (p-value = 0.007 **)</i>             |             |     |     |       |
| February                                      | 26 (2.4%)   | 23  | 3   | 11.5  |
| March                                         | 474 (44.6%) | 313 | 159 | 33.7  |
| April                                         | 558 (52.5%) | 406 | 150 | 27.0  |
| Missing                                       | 1(0.09%)    | 0   | 1   | 100.0 |

9

10 **Table S2. Comorbidity data summaries by died (n = 313) and alive (n =746) groups. Data tabulated are counts, with estimated odds**  
 11 **ratios (OR), with 95% confidence intervals, and p-values from Fisher's exact tests for each comorbidity.**

12

| Comorbidity | Alive | Died | OR | p-value |
|-------------|-------|------|----|---------|
|-------------|-------|------|----|---------|

|                                                 | (n = 746)       | (n = 313)       | (95% CI)          |            |
|-------------------------------------------------|-----------------|-----------------|-------------------|------------|
|                                                 | Y:N (%Y)        | Y:N (%Y)        |                   |            |
| Current smoker                                  | 34:712 (4.6%)   | 9:304 (2.9%)    | 0.62 (0.26, 1.34) | 0.235 -    |
| Asthma                                          | 53:693 (7.1%)   | 21:292 (6.7%)   | 0.94 (0.53, 1.62) | 0.895 -    |
| Current cancer diagnosis                        | 57:689 (7.6%)   | 24:289 (7.7%)   | 1.00 (0.58, 1.68) | 0.999 -    |
| Chronic kidney disease (moderate/severe)        | 106:640 (14.2%) | 71:242 (22.7%)  | 1.77 (1.25, 2.51) | 0.001 **   |
| Chronic obstructive pulmonary disease (COPD)    | 95:651 (12.7%)  | 57:256 (18.2%)  | 1.53 (1.05, 2.21) | 0.027 *    |
| Congenital abnormality - cardiac                | 4:742 (0.5%)    | 1:312 (0.3%)    | 0.60 (0.01, 6.04) | 0.999 -    |
| Congenital abnormality - non-cardiac            | 0:746 (0.0%)    | 4:309 (1.3%)    | -                 | - -        |
| Congestive heart failure                        | 81:665 (10.9%)  | 58:255 (18.5%)  | 1.87 (1.27, 2.73) | <0.001 *** |
| Dementia                                        | 248:498 (33.2%) | 133:180 (42.5%) | 1.48 (1.12, 1.96) | 0.005 **   |
| Diabetes mellitus                               | 142:604 (19.0%) | 63:250 (20.1%)  | 1.07 (0.76, 1.51) | 0.671 -    |
| Hypertension                                    | 387:359 (51.9%) | 186:127 (59.4%) | 1.36 (1.03, 1.79) | 0.026 *    |
| Myocardial infarction or ischemic heart disease | 103:643 (13.8%) | 63:250 (20.1%)  | 1.57 (1.09, 2.25) | 0.012 *    |
| Peripheral vascular disease                     | 34:712 (4.6%)   | 21:292 (6.7%)   | 1.51 (0.82, 2.72) | 0.172 -    |
| Stroke/ TIA                                     | 107:639 (14.3%) | 57:256 (18.2%)  | 1.33 (0.92, 1.92) | 0.114 -    |
| Other (including other lung disease)            | 377:369 (50.5%) | 158:155 (50.5%) | 1.00 (0.76, 1.31) | 0.999 -    |

13

14 **Table S3. Diagnosis data summaries by died (n = 313) and alive (n =746) groups. Data tabulated are counts, with estimated odds ratios**  
 15 **(OR), with 95% confidence intervals, and p-values from Fisher's exact tests for each diagnosis method.**

16

17

| Diagnosis                                | Alive<br>(n = 746) | Died<br>(n = 313) | OR<br>(95% CI)    | p-value |
|------------------------------------------|--------------------|-------------------|-------------------|---------|
|                                          | Y:N (%Y)           | Y:N (%Y)          |                   |         |
| <i>Pre-op 4-7days</i>                    |                    |                   |                   |         |
| CT thorax scan (negative for SARS-CoV-2) | 10:736 (1.3%)      | 2:311 (0.6%)      | 0.47 (0.05, 2.24) | 0.526 - |

|                                           |                 |                 |                   |        |   |
|-------------------------------------------|-----------------|-----------------|-------------------|--------|---|
| CT thorax scan (positive for SARS-CoV-2)  | 12:734 (1.6%)   | 0:313 (0%)      | 0.00 (0.00, 0.85) | 0.023  | * |
| Swab (negative for SARS-CoV-2)            | 17:729 (2.3%)   | 3:310 (1%)      | 0.42 (0.08, 1.45) | 0.215  | - |
| Swab (positive for SARS-CoV-2)            | 31:715 (4.2%)   | 8:305 (2.6%)    | 0.61 (0.24, 1.37) | 0.283  | - |
| <i>Pre-op 1-3days</i>                     |                 |                 |                   |        |   |
| CT thorax scan (negative for SARS-CoV-2)  | 8:738 (1.1%)    | 3:310 (1%)      | 0.89 (0.15, 3.75) | 0.999  | - |
| CT thorax scan (positive for SARS-CoV-2)  | 10:736 (1.3%)   | 3:310 (1%)      | 0.71 (0.13, 2.79) | 0.765  | - |
| Swab (negative for SARS-CoV-2)            | 41:705 (5.5%)   | 9:304 (2.9%)    | 0.51 (0.22, 1.08) | 0.080  | - |
| Swab (positive for SARS-CoV-2)            | 86:660 (11.5%)  | 15:298 (4.8%)   | 0.39 (0.20, 0.69) | <0.001 | * |
| <i>Pre-op surgery</i>                     |                 |                 |                   |        |   |
| CT thorax scan (negative for SARS-CoV-2)  | 0:746 (0%)      | 0:313 (0%)      | -                 | 0.999  | - |
| CT thorax scan (positive for SARS-CoV-2)  | 4:742 (0.5%)    | 0:313 (0%)      | 0.00 (0.00, 3.61) | 0.326  | - |
| Swab (negative for SARS-CoV-2)            | 13:733 (1.7%)   | 2:311 (0.6%)    | 0.36 (0.04, 1.62) | 0.254  | - |
| Swab (positive for SARS-CoV-2)            | 18:728 (2.4%)   | 7:306 (2.2%)    | 0.93 (0.32, 2.35) | 1      | - |
| <i>Post-op Admission</i>                  |                 |                 |                   |        |   |
| CT thorax scan (negative for SARS-CoV-2)  | 4:742 (0.5%)    | 1:312 (0.3%)    | 0.60 (0.01, 6.04) | 0.999  | - |
| CT thorax scan (positive for SARS-CoV-2)  | 8:738 (1.1%)    | 4:309 (1.3%)    | 1.19 (0.26, 4.50) | 0.756  | - |
| Swab (negative for SARS-CoV-2)            | 51:695 (6.8%)   | 12:301 (3.8%)   | 0.54 (0.26, 1.05) | 0.064  | - |
| Swab (positive for SARS-CoV-2)            | 317:429 (42.5%) | 143:170 (45.7%) | 1.14 (0.87, 1.50) | 0.342  | - |
| <i>Discharge 30days</i>                   |                 |                 |                   |        |   |
| CT thorax scan (negative for SARS-CoV-2)  | 4:742 (0.5%)    | 0:313 (0%)      | 0.00 (0.00, 3.61) | 0.326  | - |
| CT thorax scan (positive for SARS-CoV-2)  | 0:746 (0%)      | 1:312 (0.3%)    | -                 | -      | - |
| Swab (negative for SARS-CoV-2)            | 8:738 (1.1%)    | 0:313 (0%)      | 0.00 (0.00, 1.39) | 0.114  | - |
| Swab (positive for SARS-CoV-2)            | 75:671 (10.1%)  | 27:286 (8.6%)   | 0.85 (0.51, 1.36) | 0.496  | - |
| <i>Diagnosis</i>                          |                 |                 |                   |        |   |
| Positive SARS-CoV-2 swab - before surgery | 122:624 (16.4%) | 31:282 (9.9%)   | 0.56 (0.36, 0.86) | 0.007  | * |
| Positive SARS-CoV-2 swab - after surgery  | 409:337 (54.8%) | 177:136 (56.5%) | 1.07 (0.82, 1.41) | 0.636  | - |

|                                                                      |               |               |                   |       |   |
|----------------------------------------------------------------------|---------------|---------------|-------------------|-------|---|
| CT scan of the chest confirming SARS-CoV-2 - before surgery          | 20:726 (2.7%) | 2:311 (0.6%)  | 0.23 (0.03, 0.97) | 0.033 | * |
| CT scan of the chest confirming SARS-CoV-2 - after surgery           | 9:737 (1.2%)  | 5:308 (1.6%)  | 1.33 (0.35, 4.46) | 0.569 | - |
| Clinical diagnosis or chest x-ray - suspected before time of surgery | 39:707 (5.2%) | 12:301 (3.8%) | 0.72 (0.34, 1.43) | 0.432 | - |
| Clinical diagnosis or chest x-ray - suspected after time of surgery  | 67:679 (9%)   | 31:282 (9.9%) | 1.11 (0.69, 1.77) | 0.643 | - |

18  
19  
20  
21  
22  
23  
24

**Table S4. SARS-CoV-2 symptoms data summaries by died (n = 313) and alive (n =746) groups. Data tabulated are counts, with estimated odds ratios (OR), with 95% confidence intervals, and p-values from Fisher's exact tests for each symptom.**

| Symptom                   | Alive<br>(n = 746)<br>Y:N (%Y) | Died<br>(n = 313)<br>Y:N (%Y) | OR<br>(95% CI)    | p-value |   |
|---------------------------|--------------------------------|-------------------------------|-------------------|---------|---|
| Abdominal pain            | 11:735 (1.5%)                  | 1:312 (0.3%)                  | 0.21 (0.01, 1.49) | 0.124   | - |
| Breathlessness (dyspnoea) | 54:692 (7.2%)                  | 31:282 (9.9%)                 | 1.41 (0.86, 2.28) | 0.172   | - |
| Cough                     | 73:673 (9.8%)                  | 35:278 (11.2%)                | 1.16 (0.73, 1.81) | 0.505   | - |
| Diarrhoea                 | 8:738 (1.1%)                   | 1:312 (0.3%)                  | 0.30 (0.01, 2.22) | 0.295   | - |
| Fatigue                   | 21:725 (2.8%)                  | 10:303 (3.2%)                 | 1.14 (0.47, 2.56) | 0.695   | - |
| Fever (>38 celsius)       | 61:685 (8.2%)                  | 25:288 (8%)                   | 0.98 (0.57, 1.61) | 0.999   | - |
| Haemoptysis               | 0:746 (0.0%)                   | 0:313 (0.0%)                  | -                 | -       | - |
| Myalgia                   | 10:736 (1.3%)                  | 3:310 (1%)                    | 0.71 (0.13, 2.79) | 0.765   | - |
| Nausea/vomiting           | 13:733 (1.7%)                  | 7:306 (2.2%)                  | 1.29 (0.43, 3.52) | 0.623   | - |
| Sputum                    | 8:738 (1.1%)                   | 4:309 (1.3%)                  | 1.19 (0.26, 4.50) | 0.756   | - |
| Other                     | 311:435 (41.7%)                | 136:177 (43.5%)               | 1.08 (0.82, 1.42) | 0.633   | - |

25  
26  
27

**Table S5. Pre-surgery measures data (n, mean and sd) for the full study population (n = 1063), and died (n = 313) and alive (n =746) groups, and the difference in means between groups, with 95% confidence interval, and p-values from unpaired t-tests.**

28

| Measure                               | Full<br>(n = 1063) |                | Alive<br>(n = 746) |                | Died<br>(n = 313) |                | Difference (95%CI)   | p-value |
|---------------------------------------|--------------------|----------------|--------------------|----------------|-------------------|----------------|----------------------|---------|
|                                       | n                  | Mean (SD)      | n                  | Mean (SD)      | n                 | Mean (SD)      |                      |         |
| Respiratory rate (breaths/minute)     | 996                | 17.75 (3.52)   | 706                | 17.65 (3.68)   | 289               | 18.02 (3.09)   | -0.37 (-0.85, 0.11)  | 0.132   |
| Heart rate (bpm)                      | 1022               | 81.10 (14.63)  | 723                | 81.16 (14.59)  | 298               | 80.95 (14.77)  | 0.22 (-1.76, 2.20)   | 0.830   |
| Systolic blood pressure (mmHg)        | 1023               | 138.15 (26.04) | 724                | 138.33 (25.85) | 298               | 137.61 (26.53) | 0.72 (-2.80, 4.24)   | 0.687   |
| Diastolic blood pressure (mmHg)       | 1021               | 72.97 (13.89)  | 723                | 73.07 (13.86)  | 297               | 72.70 (14.00)  | 0.37 (-1.52, 2.25)   | 0.703   |
| Haemoglobin (g/L)                     | 1062               | 117.94 (19.22) | 745                | 118.35 (19.21) | 313               | 116.93 (19.26) | 1.41 (-1.13, 3.95)   | 0.276   |
| White cell count (10 <sup>9</sup> /L) | 1060               | 10.33 (4.26)   | 744                | 10.33 (4.36)   | 313               | 10.34 (4.04)   | -0.01 (-0.57, 0.56)  | 0.976   |
| C-reactive protein (mg/L)             | 738                | 54.70 (66.26)  | 514                | 54.84 (67.68)  | 221               | 54.63 (63.34)  | 0.21 (-10.28, 10.70) | 0.969   |

29

30

31

32

33

**Table S6. Operation details for the full study population (n = 1063), and died (n = 313) and alive (n = 746) groups; p-values are for Fisher's exact tests comparing groups for each characteristic.**

| Characteristic                                | Full<br>(n = 1063) | Alive<br>(n = 746) | Died<br>(n = 313) | Died (%) |
|-----------------------------------------------|--------------------|--------------------|-------------------|----------|
| <i>Anaesthesia (p-value = 0.787)</i>          |                    |                    |                   |          |
| General                                       | 527 (49.6%)        | 368                | 157               | 29.9     |
| Regional                                      | 524 (49.3%)        | 372                | 152               | 29.0     |
| Missing                                       | 12 (27.8%)         | 6                  | 4                 | 33.3     |
| <i>Pre-op respiration (p-value = 0.031 *)</i> |                    |                    |                   |          |
| None                                          | 714 (67.2%)        | 520                | 194               | 27.2     |
| Oxygen                                        | 336 (31.6%)        | 220                | 115               | 34.3     |
| Ventilated                                    | 2 (0.2%)           | 2                  | 0                 | 0.0      |
| Missing                                       | 11(1.03%)          | 4                  | 4                 | 36.4     |
| <i>Pre-op delay (p-value = 0.220)</i>         |                    |                    |                   |          |

|                                                                         |             |     |     |      |
|-------------------------------------------------------------------------|-------------|-----|-----|------|
| < 6 hours                                                               | 16 (1.5%)   | 11  | 5   | 31.2 |
| 6-23 hours                                                              | 322 (30.3%) | 232 | 88  | 27.5 |
| 24-47 hours                                                             | 224 (21.1%) | 147 | 77  | 34.4 |
| 48-71 hours                                                             | 82 (7.7%)   | 61  | 21  | 25.6 |
| 72+ hours                                                               | 123 (11.6%) | 94  | 29  | 23.6 |
| Missing                                                                 | 296 (27.8%) | 201 | 93  | 31.4 |
| <i>Procedure (p-value = 0.015 *)</i>                                    |             |     |     |      |
| LIMB - lower limb - total hip replacement                               | 45 (4.2%)   | 41  | 4   | 8.9  |
| LIMB - lower limb fracture - Cannulated Screws                          | 5 (0.5%)    | 5   | 0   | 0.0  |
| LIMB - lower limb fracture - Reduction and Internal Fixation            | 15 (1.4%)   | 10  | 5   | 33.3 |
| LIMB - lower limb fracture - Dynamic Hip Screw                          | 276 (26%)   | 195 | 81  | 29.3 |
| LIMB - lower limb fracture - Reduction and Intramedullary Fixation      | 243 (22.9%) | 169 | 73  | 30.2 |
| LIMB - lower limb fracture - Partial Hip Replacement (Hemiarthroplasty) | 479 (45.1%) | 326 | 150 | 31.5 |
| Missing                                                                 | 0 (0.0%)    | 0   | 0   | 0.0  |

34

35

36

37

38

39

40

41

**Figure S1. Boxplots showing distributions of pre-surgery measures by outcome status (died or alive). Boxes show interquartile range (IQR), bars medians and whiskers are 1.5 times IQR.**

42

43

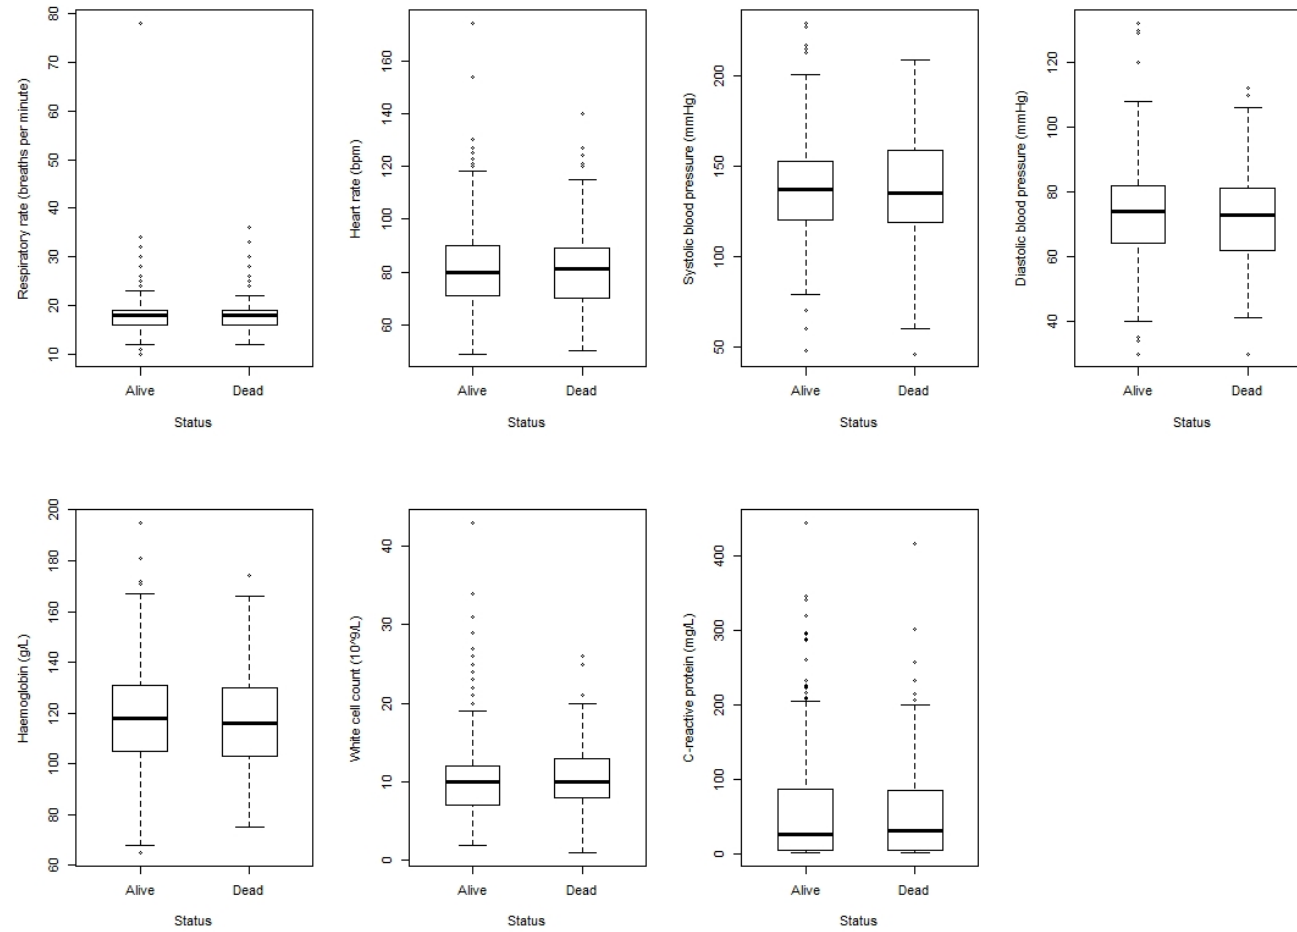

Supplement: bmjopen-2021-050830supp001.pdf [file bmjopen-2021-050830supp001.pdf]
