# Supplementary material for: Outcomes after perioperative SARS-CoV-2 infection in patients with proximal femoral fractures: an international cohort study
Source: PubMed Central journal article supplement (PMC8634634; doi:10.1136/bmjopen-2021-050830), 2021-11-30
Supplement: bmjopen-2021-050830.draft_revisions.pdf [file bmjopen-2021-050830.draft_revisions.pdf]

# BMJ Open

BMJ Open is committed to open peer review. As part of this commitment we make the peer review history of every article we publish publicly available.

When an article is published we post the peer reviewers' comments and the authors' responses online. We also post the versions of the paper that were used during peer review. These are the versions that the peer review comments apply to.

The versions of the paper that follow are the versions that were submitted during the peer review process. They are not the versions of record or the final published versions. They should not be cited or distributed as the published version of this manuscript.

BMJ Open is an open access journal and the full, final, typeset and author-corrected version of record of the manuscript is available on our site with no access controls, subscription charges or pay-per-view fees (<http://bmjopen.bmj.com>).

If you have any questions on BMJ Open's open peer review process please email [info.bmjopen@bmj.com](mailto:info.bmjopen@bmj.com)

# BMJ Open

## Outcomes after peri-operative SARS-CoV-2 infection in patients with proximal femoral fractures: an international cohort study

|                               |                                                                 |
|-------------------------------|-----------------------------------------------------------------|
| Journal:                      | <i>BMJ Open</i>                                                 |
| Manuscript ID                 | bmjopen-2021-050830                                             |
| Article Type:                 | Original research                                               |
| Date Submitted by the Author: | 08-Mar-2021                                                     |
| Complete List of Authors:     | Khatri, Chetan; University of Warwick,                          |
| Keywords:                     | COVID-19, Hip < ORTHOPAEDIC & TRAUMA SURGERY, TRAUMA MANAGEMENT |
|                               |                                                                 |

SCHOLARONE™  
Manuscripts

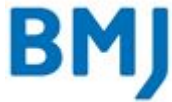

I, the Submitting Author has the right to grant and does grant on behalf of all authors of the Work (as defined in the below author licence), an exclusive licence and/or a non-exclusive licence for contributions from authors who are: i) UK Crown employees; ii) where BMJ has agreed a CC-BY licence shall apply, and/or iii) in accordance with the terms applicable for US Federal Government officers or employees acting as part of their official duties; on a worldwide, perpetual, irrevocable, royalty-free basis to BMJ Publishing Group Ltd ("BMJ") its licensees and where the relevant Journal is co-owned by BMJ to the co-owners of the Journal, to publish the Work in this journal and any other BMJ products and to exploit all rights, as set out in our [licence](#).

The Submitting Author accepts and understands that any supply made under these terms is made by BMJ to the Submitting Author unless you are acting as an employee on behalf of your employer or a postgraduate student of an affiliated institution which is paying any applicable article publishing charge ("APC") for Open Access articles. Where the Submitting Author wishes to make the Work available on an Open Access basis (and intends to pay the relevant APC), the terms of reuse of such Open Access shall be governed by a Creative Commons licence – details of these licences and which [Creative Commons](#) licence will apply to this Work are set out in our licence referred to above.

Other than as permitted in any relevant BMJ Author's Self Archiving Policies, I confirm this Work has not been accepted for publication elsewhere, is not being considered for publication elsewhere and does not duplicate material already published. I confirm all authors consent to publication of this Work and authorise the granting of this licence.

1  
2  
3  
4 1 **Outcomes after peri-operative SARS-CoV-2 infection in**  
5 2 **patients with proximal femoral fractures: an international**  
6 3 **cohort study**

8 4  
9 5 COVIDSurg Collaborative\*

10 6  
11 7  
12 8 **\*Author contributions:** Full list of authors and roles within this research project  
13 9 are available in Supplementary files, titled Authorship  
14 10 (available to editors)  
15 11  
16 12  
17 13  
18 14  
19 15  
20 16  
21 17  
22 18  
23 19  
24 20  
25 21  
26 22  
27 23  
28 24  
29 25  
30 26  
31 27  
32 28  
33 29  
34 30  
35 31  
36 32  
37 33  
38 34  
39 35  
40 36  
41 37  
42 38  
43 39  
44 40  
45 41  
46 42  
47 43  
48 44  
49 45  
50 46  
51 47  
52 48  
53 49  
54 50  
55 51  
56 52  
57 53  
58 54  
59 55  
60 56

16 **Correspondence:** **Chetan Khatri**

17 Email: Chetan.khatri@gmail.com

18 Twitter: @ChetanKhatri2

19 Address: Warwick Clinical Trials Unit

20 Warwick Medical School, University of Warwick

21 Coventry, United Kingdom

22 CV4 7AL

24 **Declarations**

25 Competing interest: The collaborative group report no conflicts of interest.

26 Funding is disclosed below.

27 Word count: 3361 (excluding tables and references)

28 Key words: Proximal fracture, SARS-CoV-2, COVID-19, Mortality

1  
2  
3 31 **ABSTRACT**

4 32  
5 33 **Objectives:** Studies have demonstrated high rates of mortality in people with  
6 34 proximal femoral fracture and SARS-CoV-2, but there is limited published data on the  
7 35 factors that influence mortality for clinicians to make informed treatment decisions.  
8 36 This study aims to report the 30-day mortality associated with peri-operative infection  
9 37 of patients undergoing surgery for proximal femoral fractures and to examine the  
10 38 factors that influence mortality in a multi-variate analysis.  
11  
12  
13  
14

15 39

16 40 **Setting:** Prospective, international, multicentre, observational cohort study.  
17  
18

19 41

20 42 **Participants:** Patients undergoing any operation for a proximal femoral fracture from  
21 43 1<sup>st</sup> February to 30<sup>th</sup> April 2020 and with perioperative SARS-CoV-2 infection (either 7-  
22 44 days prior, or 30-days post-operative).  
23  
24

25 45

26 46 **Primary outcome:** 30-day mortality. Multivariate modelling was performed to  
27 47 identify factors associated with 30-day mortality.  
28  
29

30 48

31 49 **Results:** This study reports included 1063 patients from 174 hospitals in 19  
32 50 countries. Overall 30-day mortality was 29.4% (313/1063). In an adjusted model, 30-  
33 51 day mortality was associated with male gender (OR 2.29, 95% CI 1.68-3.13,  
34 52 p=0.000), age >80 years (OR 1.60, 95% CI 1.1-2.31, p=0.013), pre-operative  
35 53 diagnosis of dementia (OR 1.57, 95% CI 1.15-2.16, p=0.005), kidney disease (OR  
36 54 1.73, 95% CI 1.18-2.55, p=0.005) and congestive heart failure (OR 1.62, 95% CI  
37 55 1.06-2.48, p=0.025). 30-day mortality was lower in patients with a pre-operative  
38 56 diagnosis of SARS-CoV-2 (OR 0.6, 95% CI 0.6 (0.42-0.85), p=0.004). There was no  
39 57 difference in mortality in patients with an increase to delay in surgery (p=0.220), or  
40 58 type of anaesthetic given (p=0.787).  
41  
42  
43  
44  
45  
46  
47

48 59

49 60 **Conclusions:** Patients undergoing surgery for a proximal femoral fracture with a  
50 61 peri-operative infection of SARS-CoV-2 have a high rate of mortality. This study  
51 62 would support the need for providing these patients with individualised medical and  
52 63 anaesthetic care, including medical optimisation before theatre. Careful pre-operative  
53 64 counselling is needed for those with a proximal femoral fracture and SARS-CoV-2,  
54 65 especially those in the highest risk groups.  
55  
56  
57  
58  
59  
60

66

1  
2  
3 67 **ARTICLE SUMMARY**  
4  
5 68

6 69 **Strengths and limitations of this study**  
7

- 8 70 • This is a large, international, multicentre cohort study from which the results  
9 are generalisable across populations in other countries.  
10 71  
11  
12 72 • This study described specific risk factors for mortality, which patients and  
13 those who care for them should use to make informed decisions regarding  
14 care.  
15 73  
16 74  
17 75 • To our current knowledge, this is the largest cohort of patients undergoing  
18 surgery for a proximal femoral fractures with SARS-CoV-2 infection  
19 diagnosed peri-operatively  
20 76  
21 77  
22 78 • There is not control arm to assess contemporaneous patients with  
23 undergoing an operation for proximal femoral fractures without SARS-CoV-2  
24 infection during the height of the pandemic. However with high-quality data  
25 present pre-pandemic strongly suggests a substantial increase in mortality.  
26 79  
27 80  
28 81  
29 82  
30 83  
31  
32  
33  
34  
35  
36  
37  
38  
39  
40  
41  
42  
43  
44  
45  
46  
47  
48  
49  
50  
51  
52  
53  
54  
55  
56  
57  
58  
59  
60

1  
2  
3 84**MAIN TEXT**4  
5 856  
7  
8 86 **Background**9  
10 87

11  
12 88 The rapid worldwide spread of Coronavirus Disease-2019 (COVID-19), caused by the  
13  
14 89 Severe Acute Respiratory Syndrome CoronaVirus-2 (SARS-CoV-2) has had a severe  
15  
16 90 effect on the elderly and frail population. A fracture of the proximal femur (neck of  
17  
18 91 femur fracture) is a critical event in the elderly, frail population, with a high rate of  
19  
20 92 death despite medical and surgical intervention [1]. Since 2007, there has been a  
21  
22 93 steady improvement in mortality after a proximal femoral fracture with 6.1% of  
23  
24 94 patients dying within 30 days of injury in the UK in 2018 [2]. However, the  
25  
26 95 emergence of COVID-19 presents a new and unquantified risk to this particularly  
27  
28 96 vulnerable group.

29  
30  
31  
32  
33  
34 97 Proximal femur fractures represent a large international burden with incidence  
35  
36 98 between 43 and 920 per 100,000 population [3]. As most fractures of the proximal  
37  
38 99 femur happen as a result of trips or falls in the home, people have continued to present  
40  
41 100 with this injury despite social restrictions [4, 5]. These patients typically have  
42  
43 101 multiple co-morbidities and frailty is common [1]. Resultantly, they are particularly  
44  
45 102 vulnerable to pulmonary complications [1, 6]. It is widely accepted that elderly  
46  
47 103 patients with existing co-morbidities are at higher risks of critical illness and mortality  
48  
49 104 due to COVID-19, potentially due to a higher preponderance to release pro-  
50  
51 105 inflammatory cytokines that result in severe disease [7-9].

52  
53  
54  
55  
56 106 Clinicians have been swift to respond to this pandemic with large re-organisation of  
57  
58 107 service provision [10, 11]. In response to this, the COVIDSurg collaborative  
59  
60

1  
2  
3 108 ([www.globalsurg.org/covidsurg](http://www.globalsurg.org/covidsurg)) has collected an international, large volume dataset  
4  
5 109 to inform the global community of the safety of surgery in patients with peri-operative  
6  
7 110 SARS-CoV-2 infection. The first report has demonstrated a 30-day mortality of  
8  
9 111 23.8% across patients undergoing any type of surgery [12]. Data published so far has  
10  
11 112 reported a high mortality rate in a small cohort of patients with proximal femoral  
12  
13 113 fractures positive for SARS-CoV-2 infection, with a maximum cohort size of 114  
14  
15 114 patients (range 10-114 patients) [13-20]. However few reports have the sample size  
16  
17 115 sufficient to explore the factors that influence outcome. Further, large-scale data are  
18  
19 116 required to explore pre-operative and operative variables that influence outcomes in  
20  
21 117 order to inform the clinical decision-making processes.  
22  
23  
24  
25  
26

## 27 118 **Aims**

28  
29 119 The primary aim of this study is to determine the mortality rate observed in patients  
30  
31 120 undergoing surgery for proximal femoral fracture with peri-operative SARS-CoV-2  
32  
33 121 infection. Secondly, we aim to explore the patient and treatment factors associated  
34  
35 122 with these outcomes.  
36  
37  
38  
39  
40  
41  
42  
43  
44  
45  
46  
47  
48  
49  
50  
51  
52  
53  
54  
55  
56  
57  
58  
59  
60



1  
2  
3 125 **Methods**  
4

5 126  
6  
7

8 127 **Setting**  
9

10 128 This is an international, multicentre cohort study including consecutive patients who  
11  
12 129 underwent surgery for proximal femoral fracture from 1<sup>st</sup> February 2020 to 30<sup>th</sup> April  
13  
14 130 2020. This study is a pre-planned sub-analysis of a larger, ongoing study designed to  
15  
16 131 assess outcomes following all surgery for patients with perioperative SARS-CoV-2  
17  
18 132 infection [12].  
19  
20  
21

22 133

23  
24 134 The COVIDSurg collaborative is an international, multicentre, multidisciplinary team  
25  
26 135 with individual collaborators collecting data locally, which is collated centrally. The  
27  
28 136 collaborative methodology, which is well described and validated was used for this  
29  
30 137 project [21]. The study protocol was registered online (ClinicalTrials.gov identifier:  
31  
32 138 NCT04323644).  
33  
34

35 139

36  
37  
38 140 **Ethics Review Board**  
39

40 141 This observational study collected anonymised routine clinical data, using an  
41  
42 142 established international trainee collaborative model [22]. Within the United  
43  
44 143 Kingdom this was registered as a clinical audit or service evaluation at each  
45  
46 144 participating trust following individual hospital policies and procedures, prior to  
47  
48 145 initiating data collection at that site. In other countries, the principal investigator was  
49  
50 146 responsible for obtaining local approval in line with local and/or national guidelines.  
51  
52  
53 147 In some participating countries, informed patient consent was taken, whilst in others  
54  
55 148 the requirement was waived by local research committees. Country-specific  
56  
57  
58  
59  
60

1  
2  
3 149 guidelines for site set-up were published on a dedicated study website  
4  
5 150 ([www.globalsurg.org/covidsurg](http://www.globalsurg.org/covidsurg)).  
6  
7

8 151

### 10 152 **Inclusion Criteria**

11  
12 153 Participating hospitals included consecutive patients undergoing surgery for proximal  
13  
14 154 femoral fractures that had SARS-CoV-2 infection diagnosed either 7 days pre-  
15  
16 155 operatively, or up to 30-days post-operatively. For those patients who underwent  
17  
18 156 multiple procedures, the procedure closest to the time of confirmation of SARS-CoV-  
19  
20 157 2 infection was defined as the index procedure.  
21  
22

23 158

24  
25 159 Patients received laboratory confirmation of SARS-CoV-2 using quantitative Reverse  
26  
27 160 Transcription Polymerase Chain Reaction (qRT-PCR). As qRT-PCR is not available  
28  
29 161 in all participating hospitals, patients were included if their diagnosis was made by  
30  
31 162 clinical or radiological findings. Clinical diagnosis was made in patients presenting  
32  
33 163 with symptoms and a clinical pattern of COVID-19. These included cough, fever  
34  
35 164 and/or myalgia [23]. Radiological diagnosis was made through computed tomography  
36  
37 165 (CT) scanning of the thorax according to local protocols. All patients who were  
38  
39 166 included solely on clinical or radiological suspicion but had a subsequent negative test  
40  
41 167 were excluded from the database by individual collaborators.  
42  
43  
44  
45

46 168

### 49 169 **Diagnosis**

50  
51 170 This study includes all patients identified as having an operation for a proximal  
52  
53 171 femoral fracture. The diagnosis was established pragmatically by the local site teams  
54  
55 172 according to their assessment of the fracture. The reported data was screened by a  
56  
57  
58  
59  
60

1  
2  
3 173 central dedicated data cleaning team, with only confirmed proximal femoral fractures  
4  
5 174 included in the cohort.  
6  
7

8 175

9  
10 176 **Patient Identification**

11  
12 177 Researchers at participating centres screened consecutive patients undergoing surgery  
13  
14 178 to ensure all patients were identified. The study was initiated in some countries after  
15  
16 179 their peak of infection, and therefore retrospective identification and data collection  
17  
18 180 was permitted, as long as the data collection was consecutive at that site.  
19  
20

21 181

22  
23  
24 182 To reduce selection bias, a variety of written materials were distributed to site leads to  
25  
26 183 highlight possible methods of identifying patients ensuring all eligible patients were  
27  
28 184 included. Investigators were invited to social media groups and online teleconferences  
29  
30 185 to trouble-shoot recruitment issues, share learning and ensure consistent recruitment  
31  
32 186 into the wider cohort.  
33  
34

35 187

36  
37  
38 188 **Outcome measures**

39  
40 189 The primary outcome measure was 30-day all-cause mortality, with the day of surgery  
41  
42 190 defined as day zero. The secondary outcome measure was rate of pulmonary  
43  
44 191 complications, which is a composite outcome defined previously from the Prevention  
45  
46 192 of Respiratory Insufficiency after Surgical Management (PRISM) randomised  
47  
48 193 controlled trial [24, 25].  
49

50 194

51  
52  
53 195 Pulmonary complications were defined as pneumonia, acute respiratory distress  
54  
55 196 syndrome (ARDS), and/or unexpected post-operative ventilation; these have been  
56  
57 197 identified as the most frequent COVID-19-related pulmonary complications in  
58  
59  
60

1  
2  
3 198 medical patients [23]. Unexpected post-operative ventilation was defined as either (i)  
4  
5 199 any episode of non-invasive ventilation, invasive ventilation, or extracorporeal  
6  
7 200 membrane oxygenation after initial extubation following surgery, or (ii) unexpected  
8  
9 201 failure to extubate following surgery [12].  
10  
11  
12

13 202

### 14 203 **Data collection and quality assurance**

15  
16  
17 204 Data was collected online using the Research Electronic Data Capture (REDCap) web  
18  
19 205 application [26]. Demographic variables recorded consisted of age, sex, and American  
20  
21 206 Society of Anesthesiologists physical status classification (ASA). Age was collected  
22  
23 207 as a categorical variable by deciles of age. ASA at the time of surgery was  
24  
25 208 dichotomized to (i) grades 1-2 and (ii) grades 3-5 for the purpose of analysis, time to  
26  
27 209 surgery to (i) under 24 hours, (ii) 24-48 hours, and (iii) over 48 hours, and surgery to  
28  
29 210 (i) hemiarthroplasty, (ii) total hip replacement, (iii) dynamic hip screw, (iv)  
30  
31 211 cannulated screws and (v) intramedullary nail. The timing of SARS-CoV-2 diagnosis  
32  
33 212 was recorded as either preoperative or post-operative.  
34  
35  
36  
37

38 213

39  
40 214 Before data was entered into analysis, site principle investigators were required to  
41  
42 215 confirm all consecutive eligible cases had been completed and uploaded. Where  
43  
44 216 diagnosis was unclear, authors were contacted for clarification.  
45  
46

47 217

### 48 218 **Statistical analysis**

49  
50  
51 219 The study was reported according to STROBE (Strengthening the Reporting  
52  
53 220 of Observational Studies in Epidemiology) guidelines [27]. Proportions are expressed  
54  
55 221 with 95% confidence intervals and the mean and 95% confidence intervals were used  
56  
57 222 where data were assumed to be approximately normally distributed. Fishers exact test  
58  
59  
60

1  
2  
3 223 was used for categorical data. Non-parametric data was summarised with the median  
4  
5 224 and interquartile ranges. Statistical significance was assessed at the 5% level.  
6  
7  
8 225

9  
10 226 The risk of death at 30 days was chosen as the primary outcome for the study. Mixed-  
11  
12 227 effects logistic regression analysis was used to assess the strength and significance of  
13  
14 228 associations between a number of explanatory variables and death within 30-days.  
15  
16  
17 229 Random effects were included in the mixed-effects model to account for the  
18  
19 230 hierarchical structure of the data (individual hospital effects are naturally nested  
20  
21 231 within country effects) and fixed effects were included to adjust for a range of pre-  
22  
23 232 operative variables that may influence mortality in this population, and relevant  
24  
25 233 factors related to the injury or treatment (e.g. type of operation, time from admission  
26  
27 234 to operation, type of anaesthetic). An additional analysis of the same factors was  
28  
29 235 undertaken using the same model structure for the secondary outcome of pulmonary  
30  
31 236 complications. All analyses were implemented in R (R Core Team (2020). R: A  
32  
33 237 language and environment for statistical computing. R Foundation for Statistical  
34  
35 238 Computing, Vienna, Austria. URL <https://www.R-project.org/>).  
36  
37  
38  
39

40 239

#### 41 42 240 **Patient and Public Involvement**

43  
44 241 Patients were not involved in the design, conduct or reporting of this study.  
45  
46  
47  
48  
49  
50  
51  
52  
53  
54  
55  
56  
57  
58  
59  
60

## 242 **Results**

243

### 244 **Population**

245 This study returned 30-day follow up for 1063 patients with proximal femoral  
246 fractures. Data was collected in 174 hospitals from 19 countries (Supplementary  
247 Table S1). Of these, 65.5% were female (696/1063). 7.8% (83/1063) patients were  
248 <70 years old, 17.8% (189/1063) were between 70-79 years, 47.7% (507/1063) were  
249 between 80-89 and 26.7% (284/1063) were 90+ years old.

250

### 251 **Mortality**

252 Overall 30-day mortality was 29.4% (313/1063). With each decile of age, mortality  
253 significantly increased, being highest in those patients >90 years old (38.7%  
254 [110/284],  $p=0.001$ ).

255

256 In an adjusted model (Figure 1), 30-day mortality was associated with male gender  
257 (OR 2.29, 95% CI 1.68-3.13,  $p=0.000$ ), age >80 years (OR 1.60, 95% CI 1.1-2.31,  
258  $p=0.013$ ), diagnosis of dementia (OR 1.57, 95% CI 1.15-2.16,  $p=0.005$ ), chronic  
259 kidney disease (OR 1.73, 95% CI 1.18-2.55,  $p=0.005$ ) and congestive heart failure  
260 (OR 1.62, 95% CI 1.06-2.48,  $p=0.025$ ). 30-day mortality was lower in patients with a  
261 pre-operative diagnosis of SARS-CoV-2 (OR 0.60, 95% CI 0.42-0.85,  $p=0.004$ ).

262 Non-adjusted values are presented in Table S2.

263

### 264 **Pulmonary complications**

265 In an adjusted model (Figure 2), respiratory complications were associated with male  
266 gender (OR 1.7, 95% CI 1.27-2.28,  $p=0.000$ ), diagnosis of dementia (OR 1.34, 95%

1  
2  
3 267 CI 1.01-1.79,  $p=0.044$ ) and congestive heart failure (OR 1.76, 95% CI 1.17-2.63,  
4  
5 268  $p=0.006$ ). Chronic Obstructive Pulmonary Disorder (COPD) showed a signal to be a  
6  
7 269 risk factor, however was not significantly associated, (OR 1.42, 95% CI 0.96-2.09,  
8  
9  
10 270  $p=0.076$ )

11  
12 271

## 13 14 272 **Diagnosis**

15  
16  
17 273 The majority of diagnosis of SARS-CoV-2 was made via PCR swab testing 93.3%  
18  
19 274 (992/1063) (Table S1 & S3) and there was no difference in mortality between those  
20  
21 275 diagnosed clinically ( $p=0.668$ ). The majority of patients received a diagnosis post-  
22  
23 276 operatively 69% (733/1063).

24  
25  
26 277

## 27 278 **Pre-operative variables**

28  
29  
30 279 Pre-operative symptoms (Table S4), including breathlessness, cough and fever ( $>38^{\circ}$   
31  
32 280 Celsius) were not significantly different in patients who were alive or dead at 30 days  
33  
34 281 post-operatively. On examination of pre-operative observations, a high respiratory  
35  
36 282 rate was predictive of mortality (OR 1.73 95% CI 1.18-2.55,  $p=0.025$ ) (Figure 1).  
37  
38 283 However, there was no significant difference in patient's heart rate, systolic or  
39  
40 284 diastolic blood pressure (Table S5, Figure S1) between those who were alive or dead  
41  
42 285 at 30 days.

43  
44  
45 286

46  
47  
48 287 Those patients with ASA grade 3-5 had a significantly higher mortality of 31.4%  
49  
50 288 (281/899) versus ASA of 1-2 of 18.5% (28/151),  $p=0.001$ .

51  
52  
53 289

## 54 290 **Procedures**

1  
2  
3 291 The operations were carried out under a general anaesthetic in 49.6% (527/1063) of  
4  
5 292 patients (Table S6). 67.2% (714/1063) of patients did not require any pre-operative  
6  
7 293 oxygen therapy. 31.8% (338/1063) of patients had their operation within 24 hours of  
8  
9 294 presentation to hospital, 21.1% (224/1063) had their operation between 24-47 hours  
10  
11 295 and 19.2% (205/1063) of patients had their operation after 48 hours of presentation to  
12  
13 296 hospital.  
14  
15  
16

17 297  
18  
19 298 45.1% (479/1063) of patients underwent hemiarthroplasty with a further 4.2%  
20  
21 299 undergoing total hip replacement (45/1063). For patients who underwent fixation,  
22  
23 300 26% (276/1063) underwent Dynamic Hip Screw (DHS) fixation, 22.9% (243/1063)  
24  
25 301 patients underwent intramedullary fixation, 0.5% (5/1063) underwent cannulated  
26  
27 302 screw fixation whilst a further 1.4% (15/1053) underwent internal fixation.  
28  
29  
30

31 303  
32  
33 304 There was no difference in mortality between patients undergoing general and  
34  
35 305 regional anaesthesia (29.9% [157/527] versus 29.0% [152/524],  $p=0.787$ ). However,  
36  
37 306 there was an increased mortality in those patients requiring pre-operative oxygen  
38  
39 307 therapy (34.3% [115/336] versus 27.2% [194/714],  $p=0.031$ )  
40  
41  
42

43 308  
44  
45 309 There was no significant difference in mortality for patients with delayed operation.  
46  
47 310 The highest mortality was for patients operated between 24-47 hours of admission  
48  
49 311 (34.4%, [77/224]) but was not significantly higher than less than those operated after  
50  
51 312 48 hours ( $p=0.220$ ).  
52  
53

54 313  
55  
56 314 Mortality was highest in March (33.7%, 159/474) compared to April (27.0%,  
57  
58 315 150/558), and February (11.5%, 3/26),  $p=0.007$  (Table S1).  
59  
60



1  
2  
3  
4  
5  
6  
7  
8  
9  
10  
11  
12  
13  
14  
15  
16  
17  
18  
19  
20  
21  
22  
23  
24  
25  
26  
27  
28  
29  
30  
31  
32  
33  
34  
35  
36  
37  
38  
39  
40  
41  
42  
43  
44  
45  
46  
47  
48  
49  
50  
51  
52  
53  
54  
55  
56  
57  
58  
59  
60

316

317 **Data Sharing**

318 No additional data available. Requests for raw data can be requested via the  
319 corresponding author.

For peer review only

1  
2  
3 320 **Discussion**  
4

5 321  
6

7 322 The 30-day mortality rate for patients with a peri-operative diagnosis of SARS-CoV-2  
8 323 infection undergoing surgery for proximal femoral fracture is substantial. An overall  
9 324 rate of 29.4% compares to the reported 30-day mortality for fracture neck of femur in  
10 325 the UK National Hip Fracture Database of 6.1% in 2018 [2]. Further, elderly patients,  
11 326 and those with medical comorbidities such as dementia, chronic kidney disease and  
12 327 congestive heart failure were associated with higher risk of 30-day mortality. Notably,  
13 328 patients with a pre-operative diagnosis of SARS-CoV-2 infection had lower rates of  
14 329 30-day mortality, likely reflecting early recognition and closer management of these  
15 330 patients. Findings from this study will be useful in guiding clinicians to identify high-  
16 331 risk patients that may warrant closer medical and surgical input during the COVID-19  
17 332 pandemic.  
18  
19  
20  
21  
22  
23  
24  
25  
26  
27  
28  
29  
30  
31  
32

33 333  
34

35 334 Considering this high mortality, it is critical that patients with proximal femoral  
36 335 fractures are protected from contracting SARS-CoV-2 in the peri-operative period. A  
37 336 study by Kayani et al. has suggested that half of infections in patients with proximal  
38 337 femoral fractures occur in hospital, as denoted by having negative pre-operative  
39 338 samples [17]. Similarly, a study by Hall et al. has suggested nearly half of cases were  
40 339 due to nosocomial transmission [28]. Within this study, 733 (69%) of infections were  
41 340 diagnosed post-operatively. This may infer that infections have been transferred in  
42 341 hospital, although due to incubation period of the virus, it is hard to know the  
43 342 proportion that contracted the virus prior to presentation or in hospital. [7, 29] Higher  
44 343 mortality was observed in people who had a post-operative diagnosis, which  
45 344 emphasises the critical importance of avoiding in-hospital transmission. Hospitals  
46  
47  
48  
49  
50  
51  
52  
53  
54  
55  
56  
57  
58  
59  
60

1  
2  
3 345 should consider implementation of careful infection control processes to minimise  
4  
5 346 and prevent transmission of SARS-CoV-2 infection. Within the elective setting, the  
6  
7  
8 347 creation of COVID-19-free surgical pathways for elective patients has been shown to  
9  
10 348 reduce infection and subsequent mortality [30-32] and whilst only some of the  
11  
12 349 principles are transferrable to the emergency setting, it demonstrates the value of  
13  
14 350 meticulous infection control processes throughout the hospital stay.  
15  
16

17 351

18  
19 352 With the added risk associated with SARS-CoV-2 infection, and the need to continue  
20  
21 353 managing this injury despite the ongoing pandemic, it is important for data to be used  
22  
23 354 as part of the informed consent process. In patients with multiple high-risk factors  
24  
25 355 such as those who are more elderly, have respiratory and cardiac co-morbidities, non-  
26  
27 356 operative management may be considered following an appropriate discussion with  
28  
29 357 the patient and/or their family. Every year in the UK, 2.5% of hip fractures are treated  
30  
31 358 non-operatively [33]. A study performed before the pandemic reported that the  
32  
33 359 mortality within thirty days for conservatively treated patients was 31.3% [34]. We do  
34  
35 360 not know the mortality from non-operative management during the pandemic for  
36  
37 361 patients with SARS-Cov-2, but the particularly high mortality associated with surgery  
38  
39 362 in high-risk groups may change the balance of benefit and harm towards conservative  
40  
41 363 treatment and this should be considered.  
42  
43  
44  
45  
46

47 364

48  
49 365 The 30-day mortality of 29.4% identified within this study is comparable to published  
50  
51 366 literature, in the UK (range from 16.3%-35.6%) [15-17, 19, 28, 35], Italy (18.75%)  
52  
53 367 [14], Spain (30.4%) [13] and the USA (range from 35.3%-56%) [18, 20]. From a  
54  
55 368 study within the UK, the authors also found a correlation between male sex and  
56  
57 369 increased mortality (OR 2.69), which is similar to that demonstrated in this study (OR  
58  
59  
60

1  
2  
3 370 2.29) [16]. Additionally, another UK study reported having more than three co-  
4  
5 371 morbidities as a risk factor for mortality [17]. This study has specifically delineated a  
6  
7 372 diagnosis of dementia, chronic kidney disease and congestive heart failure as being  
8  
9 373 independent risk factors for mortality. In a study from USA, the authors found those  
10  
11 374 patients who died were older with multiple co-morbidities and this was reflected in  
12  
13 375 statistically significant higher ASA scores in comparison to their negative  
14  
15 376 counterparts [20].  
16  
17  
18  
19  
20

21 377  
22 378 This study found that there was no significant increase in mortality with delay to  
23  
24 379 surgery. Current guidelines suggest early surgery should be undertaken [36] and this  
25  
26 380 is associated with lower mortality [37]. This would suggest that those patients at the  
27  
28 381 highest risk of mortality can have medical optimisation if appropriate and will not  
29  
30 382 result in a higher mortality from SARS-CoV-2 infection. Similarly, previous studies  
31  
32 383 have found a higher rate of mortality in patients undergoing general versus regional  
33  
34 384 anaesthesia for proximal femoral fractures [38, 39]. This study reports no difference  
35  
36 385 between general and regional anaesthetic (29.9% versus 29.0%,  $p=0.787$ ). As a result,  
37  
38 386 anaesthetic decisions in this population should not be influenced by a positive test for  
39  
40 387 SARS-CoV-2. Out of all clinical features, respiratory rate at presentation was  
41  
42 388 associated with higher mortality. Clinicians should focus on this as an important  
43  
44 389 finding when counselling patients of their peri-operative mortality.  
45  
46  
47  
48  
49

50  
51 390  
52 391 To our knowledge, this is the largest cohort of patients undergoing surgery for a  
53  
54 392 proximal femoral fractures with SARS-Cov-2 infection diagnosed peri-operatively.  
55  
56 393 This study was conducted in multiple centres, internationally, allowing it to be  
57  
58 394 generalisable across populations in other countries.  
59  
60

1  
2  
3 395  
45 396 **Limitations**  
6

7  
8 397 This study was conducted in hospitals in the early to mid-phase of the pandemic  
9  
10 398 where routine testing was not available in all participating centres. As such, to be  
11  
12 399 pragmatic, patients were included if a clinical diagnosis was made by the treating  
13  
14 400 physician. Protocols were not standardised for clinical diagnosis and were left the  
15  
16 401 senior treating physician. Laboratory diagnosis was made by qRT-PCR, from which  
17  
18 402 false-negative results may have excluded patients from analysis. Indeed, the  
19  
20 403 sensitivity of qRT-PCR testing for has shown to be as low as 32% for throat swabs  
21  
22 404 [40]. However, in patients with negative results and high clinical suspicion of SARS-  
23  
24 405 CoV-2 infection, multiple samples are often taken, including broncho-alveolar lavage.  
25  
26 406 Thus, the number of patients excluded is expected to be low. Whilst this study reports  
27  
28 407 a higher mortality from post-operative diagnosis of SARS-CoV-2 infection, it is  
29  
30 408 unclear whether the infection was contracted pre-operatively or not, as has been  
31  
32 409 discussed above.  
33  
34  
35  
36  
37

38 410  
39

40 411 This study does not have a control arm, assessing contemporaneous patients with  
41  
42 412 undergoing an operation for proximal femoral fractures without SARS-CoV-2  
43  
44 413 infection during the height of the pandemic. However, comparison with high-quality  
45  
46 414 pre-pandemic data strongly suggests a substantial increase in mortality. Patients and  
47  
48 415 those who care for them should consider this carefully when making decisions in this  
49  
50 416 common and challenging clinical scenario.  
51  
52

53 417  
5455 418 **Conclusion**  
5657 419  
58  
59  
60

1  
2  
3 420 Patients undergoing surgery for a proximal femoral fracture with a peri-operative  
4  
5 421 infection of SARS-CoV-2 have a high rate of mortality. The study would support the  
6  
7 422 approach of providing these patients with individualised medical and anaesthetic care,  
8  
9 423 including medical optimisation before theatre. It is imperative to prevent transmission  
10  
11 424 of coronavirus in the hospital setting. Careful pre-operative counselling is needed for  
12  
13 425 those with a proximal femoral fracture and SARS-CoV-2, especially those in the  
14  
15 426 highest risk groups.  
16  
17  
18  
19 427  
20  
21  
22  
23  
24  
25  
26  
27  
28  
29  
30  
31  
32  
33  
34  
35  
36  
37  
38  
39  
40  
41  
42  
43  
44  
45  
46  
47  
48  
49  
50  
51  
52  
53  
54  
55  
56  
57  
58  
59  
60

1  
2  
3 428 **Tables & Figures**

4 429

5 430 **Fig. 1 Mixed-effects logistic regression model for 30 day mortality**

6 431

7 432

8 433

9 434 **Fig. 2. Mixed-effects logistic regression model for pulmonary complications**

10 435

11 436

12 437

13 438 **Funding**

14  
15  
16  
17 439 This work was supported by a National Institute for Health Research (NIHR) Global  
18 440 Health Research Unit Grant (NIHR 16.136.79), the Association of Coloproctology of  
19 441 Great Britain and Ireland, Association of Upper Gastrointestinal Surgeons, Bowel  
20 442 Disease Research Foundation, Yorkshire Cancer Research, Sarcoma UK, the British  
21 443 Association of Surgical Oncology, the Vascular Society for Great Britain and Ireland,  
22 444 and the European Society of Coloproctology. The funders had no role in study design,  
23 445 data collection, analysis and interpretation, or writing of this report. The views  
24 446 expressed are those of the authors and not necessarily those of the National Health  
25 447 Service, the NIHR, or the UK Department of Health and Social Care

26  
27  
28 448  
29  
30  
31  
32  
33  
34  
35  
36  
37  
38  
39  
40  
41  
42  
43  
44  
45  
46  
47  
48  
49  
50  
51  
52  
53  
54  
55  
56  
57  
58  
59  
60

1  
2  
3 449 **References**  
4 450

- 5 451 1. Kistler, E.A., et al, *Frailty and short-term outcomes in patients with hip fracture.*  
6 452 *Geriatric orthopaedic surgery & rehabilitation*, 2015. **6**(3): p. 209-214.  
7 453 2. Physicians, R.C.o., *National Hip Fracture Database (NHFD) Annual Report 2019.*  
8 454 2019.  
9 455 3. Dhanwal, D.K., et al., *Epidemiology of hip fracture: worldwide geographic*  
10 456 *variation.* *Indian journal of orthopaedics*, 2011. **45**: p. 15-22.  
11 457 4. Hampton, M., et al., *The effects of a UK lockdown on orthopaedic trauma*  
12 458 *admissions and surgical cases: A multicentre comparative study.* *Bone & Joint*  
13 459 *Open*, 2020. **1**(5): p. 137-143.  
14 460 5. Scott, C.E., et al., *Population mobility and adult orthopaedic trauma services*  
15 461 *during the COVID-19 pandemic: fragility fracture provision remains a priority.*  
16 462 *Bone & Joint Open*, 2020. **1**(6): p. 182-189.  
17 463 6. Lawrence, V.A., et al., *Medical complications and outcomes after hip fracture*  
18 464 *repair.* *Archives of internal medicine*, 2002. **162**(18): p. 2053-2057.  
19 465 7. Huang, C., et al., *Clinical features of patients infected with 2019 novel coronavirus*  
20 466 *in Wuhan, China.* *Lancet*, 2020. **395**(10223): p. 497-506.  
21 467 8. Besnier, E., J.J. Tuech, and L. Schwarz, *We Asked the Experts: Covid-19 Outbreak: Is*  
22 468 *There Still a Place for Scheduled Surgery? "Reflection from Pathophysiological*  
23 469 *Data".* *World J Surg*, 2020. **44**(6): p. 1695-1698.  
24 470 9. Meftahi, G.H., et al., *The possible pathophysiology mechanism of cytokine storm in*  
25 471 *elderly adults with COVID-19 infection: the contribution of "inflammation-aging".*  
26 472 *Inflammation Research*, 2020: p. 1-15.  
27 473 10. Chang Liang, Z., et al., *Novel Coronavirus and Orthopaedic Surgery: Early*  
28 474 *Experiences from Singapore.* *J Bone Joint Surg Am*, 2020.  
29 475 11. Thornton, J., *Clinicians are leading service reconfiguration to cope with covid-19.*  
30 476 *Bmj*, 2020. **369**: p. m1444.  
31 477 12. Collaborative, C., *Mortality and pulmonary complications in patients undergoing*  
32 478 *surgery with perioperative SARS-CoV-2 infection: an international cohort study.*  
33 479 *The Lancet*, 2020.  
34 480 13. Munoz Vives, J.M., et al., *Mortality Rates of Patients with Proximal Femoral*  
35 481 *Fracture in a Worldwide Pandemic: Preliminary Results of the Spanish HIP-COVID*  
36 482 *Observational Study.* *J Bone Joint Surg Am*, 2020.  
37 483 14. Catellani, F., et al., *Treatment of Proximal Femoral Fragility Fractures in Patients*  
38 484 *with COVID-19 During the SARS-CoV-2 Outbreak in Northern Italy.* *J Bone Joint*  
39 485 *Surg Am*, 2020.  
40 486 15. Mamarelis, G., et al., *Mortality in Patients with Proximal Femoral Fracture During*  
41 487 *the COVID-19 Pandemic: A UK Hospital's Experience.* *JBJS Open Access*, 2020. **5**(4).  
42 488 16. Rasidovic, D., et al., *Impact of COVID-19 on clinical outcomes for patients with*  
43 489 *fractured hip: a multicentre observational cohort study.* *Bone & Joint Open*, 2020.  
44 490 **1**(11): p. 697-705.  
45 491 17. Kayani, B., et al., *The effects of COVID-19 on perioperative morbidity and mortality*  
46 492 *in patients with hip fractures.* *Bone Joint J*, 2020. **102-b**(9): p. 1136-1145.  
47 493 18. Egol, K.A., et al., *Increased Mortality and Major Complications in Hip Fracture Care*  
48 494 *During the COVID-19 Pandemic: A New York City Perspective.* *J Orthop Trauma*,  
49 495 2020. **34**(8): p. 395-402.  
50 496 19. Thakrar, A., et al., *Thirty-Day Mortality Rate of Patients With Hip Fractures During*  
51 497 *the COVID-19 Pandemic: A Single Centre Prospective Study in the United Kingdom.*  
52 498 *J Orthop Trauma*, 2020. **34**(9): p. e325-e329.  
53 499 20. LeBrun, D.G., et al., *Hip fracture outcomes during the COVID-19 pandemic: early*  
54 500 *results from New York.* *Journal of orthopaedic trauma*, 2020.



- 1  
2  
3 501 21. Bhangu, A., et al., *Surgical research collaboratives in the UK*. Lancet, 2013.  
4 502 **382**(9898): p. 1091-2.  
5 503 22. Collaborative, C., *COVIDSurg Protocol*. 2020.  
6 504 23. Zhou, F., et al., *Clinical course and risk factors for mortality of adult inpatients*  
7 505 *with COVID-19 in Wuhan, China: a retrospective cohort study*. Lancet, 2020.  
8 506 **395**(10229): p. 1054-1062.  
9 507 24. Abbott, T.E.F., et al., *A systematic review and consensus definitions for*  
10 508 *standardised end-points in perioperative medicine: pulmonary complications*. Br J  
11 509 Anaesth, 2018. **120**(5): p. 1066-1079.  
12 510 25. Pearse, R.M., et al., *The Prevention of Respiratory Insufficiency after Surgical*  
13 511 *Management (PRISM) Trial. Report of the protocol for a pragmatic randomized*  
14 512 *controlled trial of CPAP to prevent respiratory complications and improve survival*  
15 513 *following major abdominal surgery*. Minerva Anesthesiol, 2017. **83**(2): p. 175-182.  
16 514 26. Harris, P.A., et al., *Research electronic data capture (REDCap)—a metadata-driven*  
17 515 *methodology and workflow process for providing translational research*  
18 516 *informatics support*. Journal of biomedical informatics, 2009. **42**(2): p. 377-381.  
19 517 27. Gharaibeh, A., S. Koppikar, and F.J. Bonilla-Escobar, *Strengthening the Reporting*  
20 518 *of Observational Studies in Epidemiology (STROBE) in the International Journal of*  
21 519 *Medical Students*. International Journal of Medical Students, 2014. **2**(2): p. 36-37.  
22 520 28. Hall, A.J., et al., *IMPACT-Scot 2 report on COVID-19 in hip fracture patients: a*  
23 521 *nationwide study of mortality, risk factors for community and hospital acquired*  
24 522 *COVID-19, and suggested care pathways*. The Bone & Joint Journal, 2021. **103**: p.  
25 523 1-10.  
26 524 29. Phua, J., et al., *Intensive care management of coronavirus disease 2019 (COVID-*  
27 525 *19): challenges and recommendations*. Lancet Respir Med, 2020. **8**(5): p. 506-517.  
28 526 30. Collaborative, C., *Preoperative nasopharyngeal swab testing and postoperative*  
29 527 *pulmonary complications in patients undergoing elective surgery during the SARS-*  
30 528 *CoV-2 pandemic*. The British Journal of Surgery, 2020.  
31 529 31. Chui, K., A. Thakrar, and S. Shankar, *Evaluating the efficacy of a two-site ('COVID-*  
32 530 *19'and 'COVID-19-free') trauma and orthopaedic service for the management of*  
33 531 *hip fractures during the COVID-19 pandemic in the UK*. Bone & Joint Open, 2020.  
34 532 **1**(6): p. 190-197.  
35 533 32. Glasbey, J.C., A. Bhangu, and C. Collaborative, *Elective cancer surgery in COVID-*  
36 534 *19-free surgical pathways during the SARS-CoV-2 pandemic: an international,*  
37 535 *multicenter, comparative cohort study*. Journal of Clinical Oncology, 2020: p. JCO.  
38 536 20.01933.  
39 537 33. Databse, N.H.F. *National Hip Fracture Report*. 2020; Available from:  
40 538 <https://www.nhfd.co.uk/20/NHFDcharts.nsf/ywcharts/Surgery?opendocument>  
41 539 .  
42 540 34. Moulton, L., et al., *Outcome after conservatively managed intracapsular fractures*  
43 541 *of the femoral neck*. The Annals of The Royal College of Surgeons of England,  
44 542 2015. **97**(4): p. 279-282.  
45 543 35. Mahmood, A., et al., *Coronavirus infection in hip fractures (CHIP) study*. The Bone  
46 544 & Joint Journal, 2021: p. 1-5.  
47 545 36. Hoffenberg, R., et al., *Fractured neck of femur: Prevention and management.*  
48 546 *Summary and recommendations of a report of the Royal College of Physicians.*  
49 547 *Journal of the Royal College of Physicians of London*, 1989. **23**(1): p. 8-14.  
50 548 37. Rogers, F.B., S.R. Shackford, and M.S. Keller, *Early fixation reduces morbidity and*  
51 549 *mortality in elderly patients with hip fractures from low-impact falls*. Journal of  
52 550 *Trauma and Acute Care Surgery*, 1995. **39**(2): p. 261-265.  
53 551 38. Ahn, E.J., et al., *Comparison of general anaesthesia and regional anaesthesia in*  
54 552 *terms of mortality and complications in elderly patients with hip fracture: a*  
55 553 *nationwide population-based study*. BMJ open, 2019. **9**(9): p. e029245.

- 1  
2  
3 554 39. Van Waesberghe, J., et al., *General vs. neuraxial anaesthesia in hip fracture*  
4 555 *patients: a systematic review and meta-analysis*. BMC anesthesiology, 2017.  
5 556 **17**(1): p. 87.  
6 557 40. Wang, W., et al., *Detection of SARS-CoV-2 in Different Types of Clinical Specimens*.  
7 558 *Jama*, 2020. **323**(18): p. 1843-1844.  
8  
9  
10  
11  
12  
13  
14  
15  
16  
17  
18  
19  
20  
21  
22  
23  
24  
25  
26  
27  
28  
29  
30  
31  
32  
33  
34  
35  
36  
37  
38  
39  
40  
41  
42  
43  
44  
45  
46  
47  
48  
49  
50  
51  
52  
53  
54  
55  
56  
57  
58  
59  
60

For peer review only

1  
2  
3  
4 560 **Authorship (all co-authors PubMed citable)**

5  
6  
7 561 **To be published under collaborative authorship under group:**

8  
9  
10  
11 562 **COVIDSurg Collaborative**

12  
13  
14 563 **Authorship contribution is listed as below, according to role within collaborative:**

15  
16 564

17  
18 565 **Writing group:** Chetan Khatri, Alex E Ward, Dmitri Nepogodiev, Imran Ahmed, Daoud

19  
20 566 Chaudhry, Fatima Dhaif, Brittany Bankhad-Kendall, Haytham Kaafarani, Chris Bretherton,

21  
22 567 Ansar Mahmood, Leonard Marais, Nicholas Parsons, Aneel Bhangu, Andy Metcalfe (senior

23  
24 568 author & overall guarantor).

25  
26  
27 569

28  
29 570 **Statistical analysis:** Nicholas Parsons (lead statistician), Chetan Khatri.

30  
31 571

32  
33 572 **Operations Committee:** Kwabena Siaw-Acheampong, Daoud Chaudhry, Brett E Dawson,

34  
35 573 Jonathan P Evans, James C Glasbey, Rohan R Gujjuri, Emily Heritage, Conor S Jones, Sivesh K

36  
37 574 Kamarajah, Chetan Khatri, James M Keatley, Samuel Lawday, Elizabeth Li, Siobhan C Mckay,

38  
39 575 Dmitri Nepogodiev, Gianluca Pellino, Abhinav Tiwari, Joana FF Simoes, Isobel M Trout, Mary

40  
41 576 L Venn, Richard JW Wilkin, Aneel Bhangu.

42  
43  
44 577

45  
46 578 **Dissemination Committee:** Adesoji O Ademuyiwa, Arnav Agarwal, Ehab Al Ameer, Derek

47  
48 579 Alderson, Osaid Alser, Alexis P Arnaud, Knut Magne Augestad, Brittany Bankhead-Kendall,

49  
50 580 Ruth A Benson, Sohini Chakrabortee, Ruth Blanco-Colino, Amanpreet Brar, Ana Minaya Bravo,

51  
52 581 Kerry A Breen, Igor de Lima Buarque, Edward Caruana, Miguel F Cunha, Giana H Davidson,

1  
2  
3 582 Anant Desai, Salomone Di Saverio, John Edwards, Muhammed Elhadi, Shebani Farik, Marco  
4  
5 583 Fiore, J Edward Fitzgerald, Samuel Ford, Gaetano Gallo, Dhruv Ghosh, Gustavo Mendonça  
6  
7 584 Ataíde Gomes, Ewen Griffiths, Constantine Halkias, Ewen M Harrison, Peter Hutchinson, Arda  
8  
9  
10 585 Isik, Haytham Kaafarani, Angelos Koliass, Ismail Lawani, Hans Lederhuber, Sezai Leventoglu,  
11  
12 586 Markus W Loffler, Janet Martin, Hassan Mashbari, Dennis Mazingi, Helen Mohan, Rachel  
13  
14 587 Moore, David Moszkowicz, Joshua S Ng-Kamstra, Symeon Metallidis, Susan Moug, Milagros  
15  
16 588 Niquen, Faustin Ntiringanya, Oumaima Outani, Francesco Pata, Thomas D Pinkney, Peter  
17  
18 589 Pockney, Dejan Radenkovic, Antonio Ramos-De la Medina, Keith Roberts, Irene Santos,  
19  
20 590 Andrew Schache, Andreas Schnitzbauer, Grant D Stewart, Richard Shaw, Sebastian Shu, Kjetil  
21  
22 591 Soreide, Antonino Spinelli, Sudha Sundar, Stephen Tabiri, Philip Townend, Georgios Tsoulfas,  
23  
24 592 Gabrielle van Ramshorst, Raghavan Vidya, Dale Vimalachandran, Naomi Wright, EuroSurg,  
25  
26 593 European Society of Coloproctology, GlobalSurg, GlobalPaedSurg, ITSurg, PTSurg, SpainSurg,  
27  
28 594 S-ECCO, Joana FF Simoes (chair).

32  
33 595

34  
35 596 **Local Principal Investigators:** To be confirmed.

36  
37 597

38  
39 598 **Collaborators:** To be confirmed

40  
41 599

42  
43 600 **Data Monitoring and Ethics Committee:** Deborah S Keller, Neil J Smart

44  
45 601

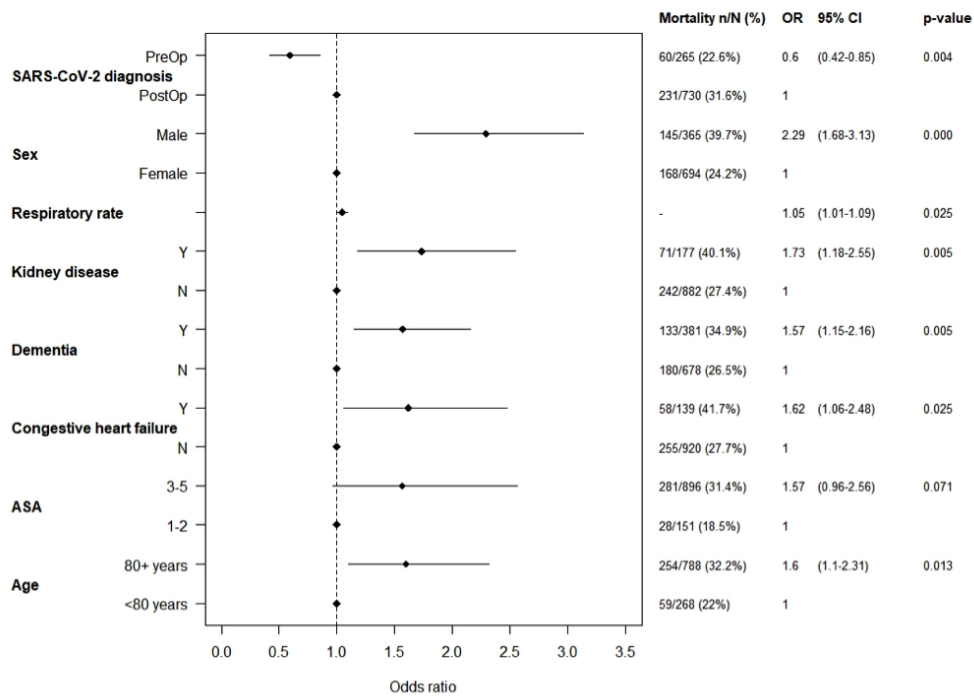

Fig. 1 Mixed-effects logistic regression model for 30 day mortality

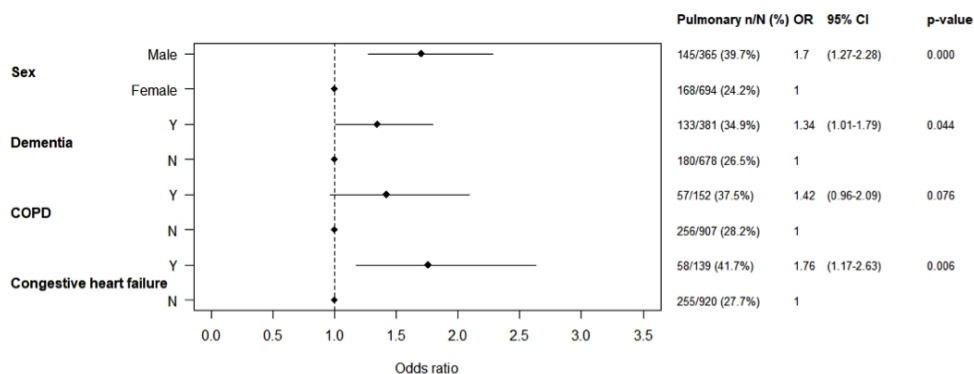

Fig. 2. Mixed-effects logistic regression model for pulmonary complications

1 **Supplementary Material**

2  
3  
4  
5 **Table S1. Baseline characteristics (sex, age, ASA grade, cardiac risk, time of diagnosis, method of diagnosis and month study participant**  
6 **recruited) of the full study population (n = 1063), and dead (n = 313) and alive (n =746) groups; p-values are for Fisher's exact tests**  
7 **comparing groups for each characteristic.**  
8

| Characteristic                       | Full<br>(n = 1063) | Alive<br>(n = 746) | Dead<br>(n = 313) | Dead<br>(%) |
|--------------------------------------|--------------------|--------------------|-------------------|-------------|
| <i>Sex (p-value = &lt;0.001 ***)</i> |                    |                    |                   |             |
| Female                               | 696 (65.5%)        | 526                | 168               | 24.2        |
| Male                                 | 367 (34.5%)        | 220                | 145               | 39.7        |
| Missing                              | 0 (0.0%)           | 0                  | 0                 | 0.0         |
| <i>Age (p-value = 0.001 **)</i>      |                    |                    |                   |             |
| 20-29 years                          | 3 (0.3%)           | 3                  | 0                 | 0.0         |
| 30-39 years                          | 2 (0.2%)           | 1                  | 1                 | 50.0        |
| 40-49 years                          | 4 (0.4%)           | 3                  | 1                 | 25.0        |
| 50-59 years                          | 24 (2.3%)          | 21                 | 3                 | 12.5        |
| 60-69 years                          | 50 (4.7%)          | 39                 | 11                | 22.0        |
| 70-79 years                          | 189 (17.8%)        | 145                | 43                | 22.9        |
| 80-89 years                          | 507 (47.7%)        | 360                | 144               | 28.6        |
| 90+ years                            | 284 (26.7%)        | 174                | 110               | 38.7        |
| Missing                              | 0(0.0%)            | 0                  | 0                 | 0.0         |
| <i>ASA (p-value = 0.001 **)</i>      |                    |                    |                   |             |
| 1-2                                  | 151 (14.2%)        | 123                | 28                | 18.5        |
| 3-5                                  | 899 (84.6%)        | 615                | 281               | 31.4        |
| Missing                              | 13(1.2%)           | 8                  | 4                 | 30.8        |

|                                               |             |     |     |       |
|-----------------------------------------------|-------------|-----|-----|-------|
| <i>Cardiac risk (p-value = &lt;0.001 ***)</i> |             |     |     |       |
| 0                                             | 487 (45.8%) | 372 | 114 | 23.5  |
| 1                                             | 349 (32.8%) | 238 | 110 | 31.6  |
| 2                                             | 169 (15.9%) | 106 | 61  | 36.5  |
| 3                                             | 44 (4.1%)   | 23  | 21  | 47.7  |
| 4                                             | 8 (0.8%)    | 5   | 3   | 37.5  |
| 5                                             | 1 (0.1%)    | 0   | 1   | 100.0 |
| Missing                                       | 5 (0.47%)   | 2   | 3   | 60.0  |
| <i>Time of diagnosis (p-value = 0.006 **)</i> |             |     |     |       |
| Post-op                                       | 733 (69%)   | 499 | 231 | 31.6  |
| Pre-op                                        | 266 (25%)   | 205 | 60  | 22.6  |
| Missing                                       | 64 (6.0%)   | 42  | 22  | 34.4  |
| <i>Diagnosis (p-value = 0.668)</i>            |             |     |     |       |
| Clinical                                      | 62 (5.8%)   | 42  | 20  | 32.3  |
| Swab                                          | 992 (93.3%) | 696 | 292 | 29.6  |
| Missing                                       |             |     |     |       |
| <i>Month (p-value = 0.007 **)</i>             |             |     |     |       |
| February                                      | 26 (2.4%)   | 23  | 3   | 11.5  |
| March                                         | 474 (44.6%) | 313 | 159 | 33.7  |
| April                                         | 558 (52.5%) | 406 | 150 | 27.0  |
| Missing                                       | 1(0.09%)    | 0   | 1   | 100.0 |

9  
10 **Table S2. Comorbidity data summaries by dead (n = 313) and alive (n =746) groups. Data tabulated are counts, with estimated odds ratios (OR), with 95% confidence intervals, and p-values from Fisher's exact tests for each comorbidity.**

| Comorbidity | Alive | Dead | OR | p-value |
|-------------|-------|------|----|---------|
|-------------|-------|------|----|---------|



1  
2  
3  
4  
5  
6  
7  
8  
9  
10  
11  
12  
13  
14  
15  
16  
17  
18  
19  
20  
21  
22  
23  
24  
25  
26  
27  
28  
29  
30  
31  
32  
33  
34  
35  
36  
37  
38  
39  
40  
41  
42  
43  
44  
45  
46

|                                                 | (n = 746)       | (n = 313)       | (95% CI)          |            |
|-------------------------------------------------|-----------------|-----------------|-------------------|------------|
|                                                 | Y:N (%Y)        | Y:N (%Y)        |                   |            |
| Current smoker                                  | 34:712 (4.6%)   | 9:304 (2.9%)    | 0.62 (0.26, 1.34) | 0.235 -    |
| Asthma                                          | 53:693 (7.1%)   | 21:292 (6.7%)   | 0.94 (0.53, 1.62) | 0.895 -    |
| Current cancer diagnosis                        | 57:689 (7.6%)   | 24:289 (7.7%)   | 1.00 (0.58, 1.68) | 0.999 -    |
| Chronic kidney disease (moderate/severe)        | 106:640 (14.2%) | 71:242 (22.7%)  | 1.77 (1.25, 2.51) | 0.001 **   |
| Chronic obstructive pulmonary disease (COPD)    | 95:651 (12.7%)  | 57:256 (18.2%)  | 1.53 (1.05, 2.21) | 0.027 *    |
| Congenital abnormality - cardiac                | 4:742 (0.5%)    | 1:312 (0.3%)    | 0.60 (0.01, 6.04) | 0.999 -    |
| Congenital abnormality - non-cardiac            | 0:746 (0.0%)    | 4:309 (1.3%)    | -                 | - -        |
| Congestive heart failure                        | 81:665 (10.9%)  | 58:255 (18.5%)  | 1.87 (1.27, 2.73) | <0.001 *** |
| Dementia                                        | 248:498 (33.2%) | 133:180 (42.5%) | 1.48 (1.12, 1.96) | 0.005 **   |
| Diabetes mellitus                               | 142:604 (19.0%) | 63:250 (20.1%)  | 1.07 (0.76, 1.51) | 0.671 -    |
| Hypertension                                    | 387:359 (51.9%) | 186:127 (59.4%) | 1.36 (1.03, 1.79) | 0.026 *    |
| Myocardial infarction or ischemic heart disease | 103:643 (13.8%) | 63:250 (20.1%)  | 1.57 (1.09, 2.25) | 0.012 *    |
| Peripheral vascular disease                     | 34:712 (4.6%)   | 21:292 (6.7%)   | 1.51 (0.82, 2.72) | 0.172 -    |
| Stroke/ TIA                                     | 107:639 (14.3%) | 57:256 (18.2%)  | 1.33 (0.92, 1.92) | 0.114 -    |
| Other (including other lung disease)            | 377:369 (50.5%) | 158:155 (50.5%) | 1.00 (0.76, 1.31) | 0.999 -    |

**Table S3. Diagnosis data summaries by dead (n = 313) and alive (n =746) groups. Data tabulated are counts, with estimated odds ratios (OR), with 95% confidence intervals, and p-values from Fisher’s exact tests for each diagnosis method.**

| Diagnosis                                | Alive<br>(n = 746) | Dead<br>(n = 313) | OR<br>(95% CI)    | p-value |
|------------------------------------------|--------------------|-------------------|-------------------|---------|
|                                          | Y:N (%Y)           | Y:N (%Y)          |                   |         |
| <i>Pre-op 4-7days</i>                    |                    |                   |                   |         |
| CT thorax scan (negative for SARS-CoV-2) | 10:736 (1.3%)      | 2:311 (0.6%)      | 0.47 (0.05, 2.24) | 0.526 - |

|                                           |                 |                 |                   |        |   |
|-------------------------------------------|-----------------|-----------------|-------------------|--------|---|
| CT thorax scan (positive for SARS-CoV-2)  | 12:734 (1.6%)   | 0:313 (0%)      | 0.00 (0.00, 0.85) | 0.023  | * |
| Swab (negative for SARS-CoV-2)            | 17:729 (2.3%)   | 3:310 (1%)      | 0.42 (0.08, 1.45) | 0.215  | - |
| Swab (positive for SARS-CoV-2)            | 31:715 (4.2%)   | 8:305 (2.6%)    | 0.61 (0.24, 1.37) | 0.283  | - |
| <i>Pre-op 1-3days</i>                     |                 |                 |                   |        |   |
| CT thorax scan (negative for SARS-CoV-2)  | 8:738 (1.1%)    | 3:310 (1%)      | 0.89 (0.15, 3.75) | 0.999  | - |
| CT thorax scan (positive for SARS-CoV-2)  | 10:736 (1.3%)   | 3:310 (1%)      | 0.71 (0.13, 2.79) | 0.765  | - |
| Swab (negative for SARS-CoV-2)            | 41:705 (5.5%)   | 9:304 (2.9%)    | 0.51 (0.22, 1.08) | 0.080  | - |
| Swab (positive for SARS-CoV-2)            | 86:660 (11.5%)  | 15:298 (4.8%)   | 0.39 (0.20, 0.69) | <0.001 | * |
| <i>Pre-op surgery</i>                     |                 |                 |                   |        |   |
| CT thorax scan (negative for SARS-CoV-2)  | 0:746 (0%)      | 0:313 (0%)      | -                 | 0.999  | - |
| CT thorax scan (positive for SARS-CoV-2)  | 4:742 (0.5%)    | 0:313 (0%)      | 0.00 (0.00, 3.61) | 0.326  | - |
| Swab (negative for SARS-CoV-2)            | 13:733 (1.7%)   | 2:311 (0.6%)    | 0.36 (0.04, 1.62) | 0.254  | - |
| Swab (positive for SARS-CoV-2)            | 18:728 (2.4%)   | 7:306 (2.2%)    | 0.93 (0.32, 2.35) | 1      | - |
| <i>Post-op Admission</i>                  |                 |                 |                   |        |   |
| CT thorax scan (negative for SARS-CoV-2)  | 4:742 (0.5%)    | 1:312 (0.3%)    | 0.60 (0.01, 6.04) | 0.999  | - |
| CT thorax scan (positive for SARS-CoV-2)  | 8:738 (1.1%)    | 4:309 (1.3%)    | 1.19 (0.26, 4.50) | 0.756  | - |
| Swab (negative for SARS-CoV-2)            | 51:695 (6.8%)   | 12:301 (3.8%)   | 0.54 (0.26, 1.05) | 0.064  | - |
| Swab (positive for SARS-CoV-2)            | 317:429 (42.5%) | 143:170 (45.7%) | 1.14 (0.87, 1.50) | 0.342  | - |
| <i>Discharge 30days</i>                   |                 |                 |                   |        |   |
| CT thorax scan (negative for SARS-CoV-2)  | 4:742 (0.5%)    | 0:313 (0%)      | 0.00 (0.00, 3.61) | 0.326  | - |
| CT thorax scan (positive for SARS-CoV-2)  | 0:746 (0%)      | 1:312 (0.3%)    | -                 | -      | - |
| Swab (negative for SARS-CoV-2)            | 8:738 (1.1%)    | 0:313 (0%)      | 0.00 (0.00, 1.39) | 0.114  | - |
| Swab (positive for SARS-CoV-2)            | 75:671 (10.1%)  | 27:286 (8.6%)   | 0.85 (0.51, 1.36) | 0.496  | - |
| <i>Diagnosis</i>                          |                 |                 |                   |        |   |
| Positive SARS-CoV-2 swab - before surgery | 122:624 (16.4%) | 31:282 (9.9%)   | 0.56 (0.36, 0.86) | 0.007  | * |
| Positive SARS-CoV-2 swab - after surgery  | 409:337 (54.8%) | 177:136 (56.5%) | 1.07 (0.82, 1.41) | 0.636  | - |

|                                                                      |               |               |                   |       |   |
|----------------------------------------------------------------------|---------------|---------------|-------------------|-------|---|
| CT scan of the chest confirming SARS-CoV-2 - before surgery          | 20:726 (2.7%) | 2:311 (0.6%)  | 0.23 (0.03, 0.97) | 0.033 | * |
| CT scan of the chest confirming SARS-CoV-2 - after surgery           | 9:737 (1.2%)  | 5:308 (1.6%)  | 1.33 (0.35, 4.46) | 0.569 | - |
| Clinical diagnosis or chest x-ray - suspected before time of surgery | 39:707 (5.2%) | 12:301 (3.8%) | 0.72 (0.34, 1.43) | 0.432 | - |
| Clinical diagnosis or chest x-ray - suspected after time of surgery  | 67:679 (9%)   | 31:282 (9.9%) | 1.11 (0.69, 1.77) | 0.643 | - |

**Table S4. SARS-CoV-2 symptoms data summaries by dead (n = 313) and alive (n =746) groups. Data tabulated are counts, with estimated odds ratios (OR), with 95% confidence intervals, and p-values from Fisher's exact tests for each symptom.**

| Symptom                   | Alive<br>(n = 746)<br>Y:N (%Y) | Dead<br>(n = 313)<br>Y:N (%Y) | OR<br>(95% CI)    | p-value |
|---------------------------|--------------------------------|-------------------------------|-------------------|---------|
| Abdominal pain            | 11:735 (1.5%)                  | 1:312 (0.3%)                  | 0.21 (0.01, 1.49) | 0.124 - |
| Breathlessness (dyspnoea) | 54:692 (7.2%)                  | 31:282 (9.9%)                 | 1.41 (0.86, 2.28) | 0.172 - |
| Cough                     | 73:673 (9.8%)                  | 35:278 (11.2%)                | 1.16 (0.73, 1.81) | 0.505 - |
| Diarrhoea                 | 8:738 (1.1%)                   | 1:312 (0.3%)                  | 0.30 (0.01, 2.22) | 0.295 - |
| Fatigue                   | 21:725 (2.8%)                  | 10:303 (3.2%)                 | 1.14 (0.47, 2.56) | 0.695 - |
| Fever (>38 celsius)       | 61:685 (8.2%)                  | 25:288 (8%)                   | 0.98 (0.57, 1.61) | 0.999 - |
| Haemoptysis               | 0:746 (0.0%)                   | 0:313 (0.0%)                  | -                 | - -     |
| Myalgia                   | 10:736 (1.3%)                  | 3:310 (1%)                    | 0.71 (0.13, 2.79) | 0.765 - |
| Nausea/vomiting           | 13:733 (1.7%)                  | 7:306 (2.2%)                  | 1.29 (0.43, 3.52) | 0.623 - |
| Sputum                    | 8:738 (1.1%)                   | 4:309 (1.3%)                  | 1.19 (0.26, 4.50) | 0.756 - |
| Other                     | 311:435 (41.7%)                | 136:177 (43.5%)               | 1.08 (0.82, 1.42) | 0.633 - |

**Table S5. Pre-surgery measures data (n, mean and sd) for the full study population (n = 1063), and dead (n = 313) and alive (n =746) groups, and the difference in means between groups, with 95% confidence interval, and p-values from unpaired t-tests.**

28

| Measure                               | Full<br>(n = 1063) |                | Alive<br>(n = 746) |                | Dead<br>(n = 313) |                | Difference (95%CI)   | p-value |
|---------------------------------------|--------------------|----------------|--------------------|----------------|-------------------|----------------|----------------------|---------|
|                                       | n                  | Mean (SD)      | n                  | Mean (SD)      | n                 | Mean (SD)      |                      |         |
| Respiratory rate (breaths/minute)     | 996                | 17.75 (3.52)   | 706                | 17.65 (3.68)   | 289               | 18.02 (3.09)   | -0.37 (-0.85, 0.11)  | 0.132   |
| Heart rate (bpm)                      | 1022               | 81.10 (14.63)  | 723                | 81.16 (14.59)  | 298               | 80.95 (14.77)  | 0.22 (-1.76, 2.20)   | 0.830   |
| Systolic blood pressure (mmHg)        | 1023               | 138.15 (26.04) | 724                | 138.33 (25.85) | 298               | 137.61 (26.53) | 0.72 (-2.80, 4.24)   | 0.687   |
| Diastolic blood pressure (mmHg)       | 1021               | 72.97 (13.89)  | 723                | 73.07 (13.86)  | 297               | 72.70 (14.00)  | 0.37 (-1.52, 2.25)   | 0.703   |
| Haemoglobin (g/L)                     | 1062               | 117.94 (19.22) | 745                | 118.35 (19.21) | 313               | 116.93 (19.26) | 1.41 (-1.13, 3.95)   | 0.276   |
| White cell count (10 <sup>9</sup> /L) | 1060               | 10.33 (4.26)   | 744                | 10.33 (4.36)   | 313               | 10.34 (4.04)   | -0.01 (-0.57, 0.56)  | 0.976   |
| C-reactive protein (mg/L)             | 738                | 54.70 (66.26)  | 514                | 54.84 (67.68)  | 221               | 54.63 (63.34)  | 0.21 (-10.28, 10.70) | 0.969   |

29

30

31

32

33

**Table S6. Operation details for the full study population (n = 1063), and dead (n = 313) and alive (n = 746) groups; p-values are for Fisher's exact tests comparing groups for each characteristic.**

| Characteristic                                | Full<br>(n = 1063) | Alive<br>(n = 746) | Dead<br>(n = 313) | Dead (%) |
|-----------------------------------------------|--------------------|--------------------|-------------------|----------|
| <i>Anaesthesia (p-value = 0.787)</i>          |                    |                    |                   |          |
| General                                       | 527 (49.6%)        | 368                | 157               | 29.9     |
| Regional                                      | 524 (49.3%)        | 372                | 152               | 29.0     |
| Missing                                       | 12 (27.8%)         | 6                  | 4                 | 33.3     |
| <i>Pre-op respiration (p-value = 0.031 *)</i> |                    |                    |                   |          |
| None                                          | 714 (67.2%)        | 520                | 194               | 27.2     |
| Oxygen                                        | 336 (31.6%)        | 220                | 115               | 34.3     |
| Ventilated                                    | 2 (0.2%)           | 2                  | 0                 | 0.0      |
| Missing                                       | 11(1.03%)          | 4                  | 4                 | 36.4     |
| <i>Pre-op delay (p-value = 0.220)</i>         |                    |                    |                   |          |

|                                                                         |             |     |     |      |
|-------------------------------------------------------------------------|-------------|-----|-----|------|
| < 6 hours                                                               | 16 (1.5%)   | 11  | 5   | 31.2 |
| 6-23 hours                                                              | 322 (30.3%) | 232 | 88  | 27.5 |
| 24-47 hours                                                             | 224 (21.1%) | 147 | 77  | 34.4 |
| 48-71 hours                                                             | 82 (7.7%)   | 61  | 21  | 25.6 |
| 72+ hours                                                               | 123 (11.6%) | 94  | 29  | 23.6 |
| Missing                                                                 | 296 (27.8%) | 201 | 93  | 31.4 |
| <i>Procedure (p-value = 0.015 *)</i>                                    |             |     |     |      |
| LIMB - lower limb - total hip replacement                               | 45 (4.2%)   | 41  | 4   | 8.9  |
| LIMB - lower limb fracture - Cannulated Screws                          | 5 (0.5%)    | 5   | 0   | 0.0  |
| LIMB - lower limb fracture - Reduction and Internal Fixation            | 15 (1.4%)   | 10  | 5   | 33.3 |
| LIMB - lower limb fracture - Dynamic Hip Screw                          | 276 (26%)   | 195 | 81  | 29.3 |
| LIMB - lower limb fracture - Reduction and Intramedullary Fixation      | 243 (22.9%) | 169 | 73  | 30.2 |
| LIMB - lower limb fracture - Partial Hip Replacement (Hemiarthroplasty) | 479 (45.1%) | 326 | 150 | 31.5 |
| Missing                                                                 | 0 (0.0%)    | 0   | 0   | 0.0  |

**Figure S1. Boxplots showing distributions of pre-surgery measures by outcome status (dead or alive). Boxes show interquartile range (IQR), bars medians and whiskers are 1.5 times IQR.**

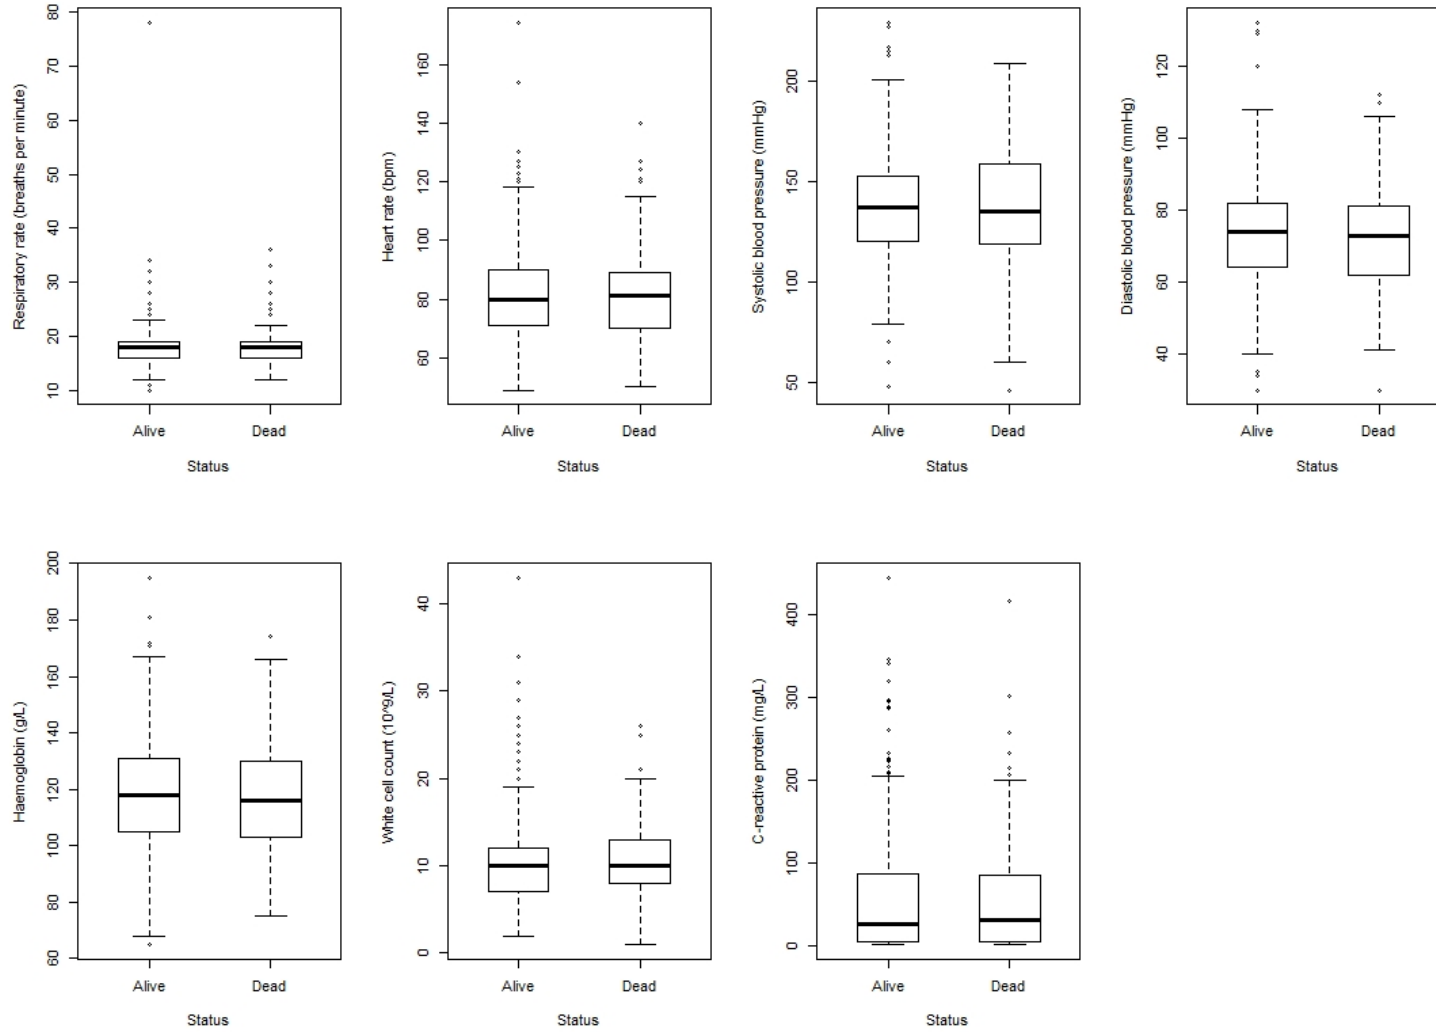

44

1  
2  
3  
4  
5  
6  
7  
8  
9  
10  
11  
12  
13  
14  
15  
16  
17  
18  
19  
20  
21  
22  
23  
24  
25  
26  
27  
28  
29  
30  
31  
32  
33  
34  
35  
36  
37  
38  
39  
40  
41  
42  
43  
44  
45  
46

For peer review only

STROBE Statement—Checklist of items that should be included in reports of *cohort studies*

|                              | Item No | Recommendation                                                                                                                                                                                                                                                                                                         | Page No |
|------------------------------|---------|------------------------------------------------------------------------------------------------------------------------------------------------------------------------------------------------------------------------------------------------------------------------------------------------------------------------|---------|
| <b>Title and abstract</b>    | 1       | (a) Indicate the study's design with a commonly used term in the title or the abstract<br>(b) Provide in the abstract an informative and balanced summary of what was done and what was found                                                                                                                          | 1 & 2   |
| <b>Introduction</b>          |         |                                                                                                                                                                                                                                                                                                                        |         |
| Background/rationale         | 2       | Explain the scientific background and rationale for the investigation being reported                                                                                                                                                                                                                                   | 3       |
| Objectives                   | 3       | State specific objectives, including any prespecified hypotheses                                                                                                                                                                                                                                                       | 4       |
| <b>Methods</b>               |         |                                                                                                                                                                                                                                                                                                                        |         |
| Study design                 | 4       | Present key elements of study design early in the paper                                                                                                                                                                                                                                                                | 5       |
| Setting                      | 5       | Describe the setting, locations, and relevant dates, including periods of recruitment, exposure, follow-up, and data collection                                                                                                                                                                                        | 5       |
| Participants                 | 6       | (a) Give the eligibility criteria, and the sources and methods of selection of participants. Describe methods of follow-up<br>(b) For matched studies, give matching criteria and number of exposed and unexposed                                                                                                      | 6       |
| Variables                    | 7       | Clearly define all outcomes, exposures, predictors, potential confounders, and effect modifiers. Give diagnostic criteria, if applicable                                                                                                                                                                               | 7       |
| Data sources/<br>measurement | 8*      | For each variable of interest, give sources of data and details of methods of assessment (measurement). Describe comparability of assessment methods if there is more than one group                                                                                                                                   | 6       |
| Bias                         | 9       | Describe any efforts to address potential sources of bias                                                                                                                                                                                                                                                              | 8       |
| Study size                   | 10      | Explain how the study size was arrived at                                                                                                                                                                                                                                                                              | N/A     |
| Quantitative variables       | 11      | Explain how quantitative variables were handled in the analyses. If applicable, describe which groupings were chosen and why                                                                                                                                                                                           | 8       |
| Statistical methods          | 12      | (a) Describe all statistical methods, including those used to control for confounding<br>(b) Describe any methods used to examine subgroups and interactions<br>(c) Explain how missing data were addressed<br>(d) If applicable, explain how loss to follow-up was addressed<br>(e) Describe any sensitivity analyses | 8       |
| <b>Results</b>               |         |                                                                                                                                                                                                                                                                                                                        |         |
| Participants                 | 13*     | (a) Report numbers of individuals at each stage of study—eg numbers potentially eligible, examined for eligibility, confirmed eligible, included in the study, completing follow-up, and analysed<br>(b) Give reasons for non-participation at each stage<br>(c) Consider use of a flow diagram                        | 9       |
| Descriptive data             | 14*     | (a) Give characteristics of study participants (eg demographic, clinical, social) and information on exposures and potential confounders<br>(b) Indicate number of participants with missing data for each variable of interest<br>(c) Summarise follow-up time (eg, average and total amount)                         | 9       |
| Outcome data                 | 15*     | Report numbers of outcome events or summary measures over time                                                                                                                                                                                                                                                         | 9       |



|    |                          |    |                                                                                                                                                                                                              |       |
|----|--------------------------|----|--------------------------------------------------------------------------------------------------------------------------------------------------------------------------------------------------------------|-------|
| 1  | Main results             | 16 | (a) Give unadjusted estimates and, if applicable, confounder-adjusted estimates and their precision (eg, 95% confidence interval). Make clear which confounders were adjusted for and why they were included | 9-12  |
| 2  |                          |    | (b) Report category boundaries when continuous variables were categorized                                                                                                                                    |       |
| 3  |                          |    | (c) If relevant, consider translating estimates of relative risk into absolute risk for a meaningful time period                                                                                             |       |
| 4  |                          |    |                                                                                                                                                                                                              |       |
| 5  |                          |    |                                                                                                                                                                                                              |       |
| 6  |                          |    |                                                                                                                                                                                                              |       |
| 7  |                          |    |                                                                                                                                                                                                              |       |
| 8  |                          |    |                                                                                                                                                                                                              |       |
| 9  | Other analyses           | 17 | Report other analyses done—eg analyses of subgroups and interactions, and sensitivity analyses                                                                                                               | 9-12  |
| 10 |                          |    |                                                                                                                                                                                                              |       |
| 11 | <b>Discussion</b>        |    |                                                                                                                                                                                                              |       |
| 12 |                          |    |                                                                                                                                                                                                              |       |
| 13 | Key results              | 18 | Summarise key results with reference to study objectives                                                                                                                                                     | 13    |
| 14 | Limitations              | 19 | Discuss limitations of the study, taking into account sources of potential bias or imprecision. Discuss both direction and magnitude of any potential bias                                                   | 16    |
| 15 |                          |    |                                                                                                                                                                                                              |       |
| 16 | Interpretation           | 20 | Give a cautious overall interpretation of results considering objectives, limitations, multiplicity of analyses, results from similar studies, and other relevant evidence                                   | 13-15 |
| 17 |                          |    |                                                                                                                                                                                                              |       |
| 18 | Generalisability         | 21 | Discuss the generalisability (external validity) of the study results                                                                                                                                        | 13-15 |
| 19 |                          |    |                                                                                                                                                                                                              |       |
| 20 |                          |    |                                                                                                                                                                                                              |       |
| 21 | <b>Other information</b> |    |                                                                                                                                                                                                              |       |
| 22 |                          |    |                                                                                                                                                                                                              |       |
| 23 | Funding                  | 22 | Give the source of funding and the role of the funders for the present study and, if applicable, for the original study on which the present article is based                                                | 1     |
| 24 |                          |    |                                                                                                                                                                                                              |       |

\*Give information separately for exposed and unexposed groups.

**Note:** An Explanation and Elaboration article discusses each checklist item and gives methodological background and published examples of transparent reporting. The STROBE checklist is best used in conjunction with this article (freely available on the Web sites of PLoS Medicine at <http://www.plosmedicine.org/>, Annals of Internal Medicine at <http://www.annals.org/>, and Epidemiology at <http://www.epidem.com/>). Information on the STROBE Initiative is available at <http://www.strobe-statement.org>.

# BMJ Open

## Outcomes after peri-operative SARS-CoV-2 infection in patients with proximal femoral fractures: an international cohort study

|                                 |                                                                 |
|---------------------------------|-----------------------------------------------------------------|
| Journal:                        | <i>BMJ Open</i>                                                 |
| Manuscript ID                   | bmjopen-2021-050830.R1                                          |
| Article Type:                   | Original research                                               |
| Date Submitted by the Author:   | 24-Aug-2021                                                     |
| Complete List of Authors:       | Khatri, Chetan; University of Warwick,                          |
| <b>Primary Subject Heading</b>: | Surgery                                                         |
| Secondary Subject Heading:      | Anaesthesia, Evidence based practice                            |
| Keywords:                       | COVID-19, Hip < ORTHOPAEDIC & TRAUMA SURGERY, TRAUMA MANAGEMENT |
|                                 |                                                                 |

SCHOLARONE™  
Manuscripts



I, the Submitting Author has the right to grant and does grant on behalf of all authors of the Work (as defined in the below author licence), an exclusive licence and/or a non-exclusive licence for contributions from authors who are: i) UK Crown employees; ii) where BMJ has agreed a CC-BY licence shall apply, and/or iii) in accordance with the terms applicable for US Federal Government officers or employees acting as part of their official duties; on a worldwide, perpetual, irrevocable, royalty-free basis to BMJ Publishing Group Ltd ("BMJ") its licensees and where the relevant Journal is co-owned by BMJ to the co-owners of the Journal, to publish the Work in this journal and any other BMJ products and to exploit all rights, as set out in our [licence](#).

The Submitting Author accepts and understands that any supply made under these terms is made by BMJ to the Submitting Author unless you are acting as an employee on behalf of your employer or a postgraduate student of an affiliated institution which is paying any applicable article publishing charge ("APC") for Open Access articles. Where the Submitting Author wishes to make the Work available on an Open Access basis (and intends to pay the relevant APC), the terms of reuse of such Open Access shall be governed by a Creative Commons licence – details of these licences and which [Creative Commons](#) licence will apply to this Work are set out in our licence referred to above.

Other than as permitted in any relevant BMJ Author's Self Archiving Policies, I confirm this Work has not been accepted for publication elsewhere, is not being considered for publication elsewhere and does not duplicate material already published. I confirm all authors consent to publication of this Work and authorise the granting of this licence.

1  
2  
3  
4 1 **Outcomes after peri-operative SARS-CoV-2 infection in**  
5 2 **patients with proximal femoral fractures: an international**  
6 3 **cohort study**

8 4  
9 5 COVIDSurg Collaborative\*

10 6  
11 7  
12 8 **\*Author contributions:** Full list of authors and roles within this research project  
13 9 are available in Supplementary files, titled Authorship  
14 10 (available to editors)  
15 11  
16 12  
17 13  
18 14  
19 15  
20 16  
21 17  
22 18  
23 19  
24 20  
25 21  
26 22  
27 23  
28 24  
29 25  
30 26  
31 27  
32 28  
33 29  
34 30  
35 31  
36 32  
37 33  
38 34  
39 35  
40 36  
41 37  
42 38  
43 39  
44 40  
45 41  
46 42  
47 43  
48 44  
49 45  
50 46  
51 47  
52 48  
53 49  
54 50  
55 51  
56 52  
57 53  
58 54  
59 55  
60 56

16 **Correspondence:** **Chetan Khatri**  
17 Email: Chetan.khatri@gmail.com  
18 Twitter: @ChetanKhatri2  
19 Address: Warwick Clinical Trials Unit  
20 Warwick Medical School, University of Warwick  
21 Coventry, United Kingdom  
22 CV4 7AL

24 **Declarations**

25 Competing interest: The collaborative group report no conflicts of interest.  
26 Funding is disclosed below.

27 Word count: 3361 (excluding tables and references)

28 Key words: Proximal fracture, SARS-CoV-2, COVID-19, Mortality

1  
2  
3 31 **ABSTRACT**  
4 32

5 33 **Objectives:** Studies have demonstrated high rates of mortality in people with  
6 34 proximal femoral fracture and SARS-CoV-2, but there is limited published data on the  
7 35 factors that influence mortality for clinicians to make informed treatment decisions.  
8 36 This study aims to report the 30-day mortality associated with peri-operative infection  
9 37 of patients undergoing surgery for proximal femoral fractures and to examine the  
10 38 factors that influence mortality in a multi-variate analysis.  
11  
12  
13  
14

15 39  
16 40 **Setting:** Prospective, international, multicentre, observational cohort study.  
17  
18  
19

20 42 **Participants:** Patients undergoing any operation for a proximal femoral fracture from  
21 43 1<sup>st</sup> February to 30<sup>th</sup> April 2020 and with perioperative SARS-CoV-2 infection (either 7-  
22 44 days prior, or 30-days post-operative).  
23  
24  
25

26 46 **Primary outcome:** 30-day mortality. Multivariate modelling was performed to  
27 47 identify factors associated with 30-day mortality.  
28  
29  
30

31 49 **Results:** This study reports included 1063 patients from 174 hospitals in 19  
32 50 countries. Overall 30-day mortality was 29.4% (313/1063). In an adjusted model, 30-  
33 51 day mortality was associated with male gender (OR 2.29, 95% CI 1.68-3.13,  
34 52 p<0.001), age >80 years (OR 1.60, 95% CI 1.1-2.31, p=0.013), pre-operative  
35 53 diagnosis of dementia (OR 1.57, 95% CI 1.15-2.16, p=0.005), kidney disease (OR  
36 54 1.73, 95% CI 1.18-2.55, p=0.005) and congestive heart failure (OR 1.62, 95% CI  
37 55 1.06-2.48, p=0.025). Mortality at 30-days was lower in patients with a pre-operative  
38 56 diagnosis of SARS-CoV-2 (OR 0.6, 95% CI 0.6 (0.42-0.85), p=0.004). There was no  
39 57 difference in mortality in patients with an increase to delay in surgery (p=0.220), or  
40 58 type of anaesthetic given (p=0.787).  
41  
42  
43  
44  
45  
46  
47

48 60 **Conclusions:** Patients undergoing surgery for a proximal femoral fracture with a  
49 61 peri-operative infection of SARS-CoV-2 have a high rate of mortality. This study  
50 62 would support the need for providing these patients with individualised medical and  
51 63 anaesthetic care, including medical optimisation before theatre. Careful pre-operative  
52 64 counselling is needed for those with a proximal femoral fracture and SARS-CoV-2,  
53 65 especially those in the highest risk groups.  
54  
55  
56  
57  
58  
59  
60

1  
2  
3 67 **ARTICLE SUMMARY**  
4

5 68

6 69 **Strengths and limitations of this study**  
7

8 70 • This is a large, international, multicentre cohort study from which the results  
9  
10 are generalisable across populations in other countries.  
11

12 72 • This study described specific risk factors for mortality, which patients and  
13  
14 those who care for them should use to make informed decisions regarding  
15  
16 care.  
17  
18

19 75 • There is not control arm to assess contemporaneous patients with  
20  
21 undergoing an operation for proximal femoral fractures without SARS-CoV-2  
22  
23 infection during the height of the pandemic. However with high-quality data  
24  
25 present pre-pandemic strongly suggests a substantial increase in mortality.  
26  
27

28 79

29  
30 80  
31  
32  
33  
34  
35  
36  
37  
38  
39  
40  
41  
42  
43  
44  
45  
46  
47  
48  
49  
50  
51  
52  
53  
54  
55  
56  
57  
58  
59  
60

1  
2  
3 81**MAIN TEXT**4  
5 826  
7  
8 83 **Background**9  
10 84

11  
12 85 The rapid worldwide spread of Coronavirus Disease-2019 (COVID-19), caused by the  
13  
14 86 Severe Acute Respiratory Syndrome CoronaVirus-2 (SARS-CoV-2) has had a severe  
15  
16  
17 87 effect on the elderly and frail population. A fracture of the proximal femur (neck of  
18  
19 88 femur fracture) is a critical event in the elderly, frail population, with a high rate of  
20  
21 89 death despite medical and surgical intervention [1]. Since 2007, there has been a  
22  
23 90 steady improvement in mortality after a proximal femoral fracture with 6.1% of  
24  
25 91 patients dying within 30 days of injury in the UK in 2018 [2]. However, the  
26  
27 92 emergence of COVID-19 presents a new and unquantified risk to this particularly  
28  
29 93 vulnerable group.  
30  
31

32  
33  
34 94 Proximal femur fractures represent a large international burden with incidence  
35  
36 95 between 43 and 920 per 100,000 population [3]. As most fractures of the proximal  
37  
38 96 femur happen as a result of trips or falls in the home, people have continued to present  
39  
40 97 with this injury despite social restrictions [4, 5]. These patients typically have  
41  
42 98 multiple co-morbidities and frailty is common [1]. Resultantly, they are particularly  
43  
44 99 vulnerable to pulmonary complications [1, 6]. It is widely accepted that elderly  
45  
46 100 patients with existing co-morbidities are at higher risks of critical illness and mortality  
47  
48 101 due to COVID-19, potentially due to a higher preponderance to release pro-  
49  
50 102 inflammatory cytokines that result in severe disease [7-9].  
51  
52  
53

54  
55  
56 103 Clinicians have been swift to respond to this pandemic with large re-organisation of  
57  
58 104 service provision [10, 11]. In response to this, the COVIDSurg collaborative  
59  
60

1  
2  
3 105 ([www.globalsurg.org/covidsurg](http://www.globalsurg.org/covidsurg)) has collected an international, large volume dataset  
4  
5 106 to inform the global community of the safety of surgery in patients with peri-operative  
6  
7 107 SARS-CoV-2 infection. The first report has demonstrated a 30-day mortality of  
8  
9 108 23.8% across patients undergoing any type of surgery [12]. Data published so far has  
10  
11 109 reported a high mortality rate in a small cohort of patients with proximal femoral  
12  
13 110 fractures positive for SARS-CoV-2 infection, with a maximum cohort size of 114  
14  
15 111 patients (range 10-114 patients) [13-20]. However few reports have the sample size  
16  
17 112 sufficient to explore the factors that influence outcome. Further, large-scale data are  
18  
19 113 required to explore pre-operative and operative variables that influence outcomes in  
20  
21 114 order to inform the clinical decision-making processes.  
22  
23  
24  
25  
26

### 27 **Aims**

28  
29 116 The primary aim of this study is to determine the mortality rate observed in patients  
30  
31 117 undergoing surgery for proximal femoral fracture with peri-operative SARS-CoV-2  
32  
33 118 infection. Secondly, we aim to explore the patient and treatment factors associated  
34  
35 119 with these outcomes.  
36  
37  
38  
39  
40  
41  
42  
43  
44  
45  
46  
47  
48  
49  
50  
51  
52  
53  
54  
55  
56  
57  
58  
59  
60



1  
2  
3 120 **Methods**  
4

5 121  
6

7  
8 122 **Setting**  
9

10 123 This is an international, multicentre cohort study including consecutive patients who  
11  
12 124 underwent surgery for proximal femoral fracture from 1<sup>st</sup> February 2020 to 30<sup>th</sup> April  
13  
14 125 2020. This study is a pre-planned sub-analysis of a larger, ongoing study designed to  
15  
16 126 assess outcomes following all surgery for patients with perioperative SARS-CoV-2  
17  
18 127 infection [12].  
19  
20

21 128  
22

23  
24 129 The COVIDSurg collaborative is an international, multicentre, multidisciplinary team  
25  
26 130 with individual collaborators collecting data locally, which is collated centrally. The  
27  
28 131 collaborative methodology, which is well described and validated was used for this  
29  
30 132 project [21]. The study protocol was registered online (ClinicalTrials.gov identifier:  
31  
32 133 NCT04323644).  
33  
34

35 134  
36

37  
38 135 **Inclusion Criteria**  
39

40 136 Participating hospitals included consecutive patients undergoing surgery for proximal  
41  
42 137 femoral fractures that had SARS-CoV-2 infection diagnosed (laboratory, clinical or  
43  
44 138 radiologically) either 7 days pre-operatively, or up to 30-days post-operatively. For  
45  
46 139 those diagnosed pre-operative, this represents the timeframe where the majority of  
47  
48 140 patients still active disease [22]. For those patients who underwent multiple  
49  
50 141 procedures, the procedure closest to the time of confirmation of SARS-CoV-2  
51  
52 142 infection was defined as the index procedure.  
53  
54

55  
56 143  
57  
58  
59  
60

1  
2  
3 144 Patients received laboratory confirmation of SARS-CoV-2 using quantitative Reverse  
4  
5 145 Transcription Polymerase Chain Reaction (qRT-PCR). As qRT-PCR is not available  
6  
7 146 in all participating hospitals, patients were included if their diagnosis was made by  
8  
9 147 clinical or radiological findings. Clinical diagnosis was made in patients presenting  
10  
11 148 with symptoms and a clinical pattern of COVID-19. These included cough, fever  
12  
13 149 and/or myalgia [23]. Radiological diagnosis was made through computed tomography  
14  
15 150 (CT) scanning of the thorax according to local protocols. All patients who were  
16  
17 151 included solely on clinical or radiological suspicion but had a subsequent negative test  
18  
19 152 were excluded from the database by individual collaborators.  
20  
21  
22  
23  
24  
25

## 26 154 **Diagnosis**

27  
28 155 This study includes all patients identified as having an operation for a proximal  
29  
30 156 femoral fracture. The diagnosis was established pragmatically by the local site teams  
31  
32 157 according to their assessment of the fracture. The reported data was screened by a  
33  
34 158 central dedicated data cleaning team, with only confirmed proximal femoral fractures  
35  
36 159 included in the cohort.  
37  
38  
39  
40  
41

## 42 161 **Patient Identification**

43  
44 162 Researchers at participating centres screened consecutive patients undergoing surgery  
45  
46 163 to ensure all patients were identified. The study was initiated in some countries after  
47  
48 164 their peak of infection, and therefore retrospective identification and data collection  
49  
50 165 was permitted, as long as the data collection was consecutive at that site.  
51  
52  
53  
54  
55

56 167 To reduce selection bias, a variety of written materials were distributed to site leads to  
57  
58 168 highlight possible methods of identifying patients ensuring all eligible patients were  
59  
60

1  
2  
3 169 included. Investigators were invited to social media groups and online teleconferences  
4  
5 170 to trouble-shoot recruitment issues, share learning and ensure consistent recruitment  
6  
7  
8 171 into the wider cohort.  
9

10 172

### 12 173 **Outcome measures**

14 174 The primary outcome measure was 30-day all-cause mortality, with the day of surgery  
15  
16  
17 175 defined as day zero. The secondary outcome measure was rate of pulmonary  
18  
19 176 complications, which is a composite outcome defined previously from the Prevention  
20  
21 177 of Respiratory Insufficiency after Surgical Management (PRISM) randomised  
22  
23  
24 178 controlled trial [24, 25].  
25

26 179

28 180 Pulmonary complications were defined as pneumonia, acute respiratory distress  
29  
30  
31 181 syndrome (ARDS), and/or unexpected post-operative ventilation; these have been  
32  
33 182 identified as the most frequent COVID-19-related pulmonary complications in  
34  
35 183 medical patients [23]. Unexpected post-operative ventilation was defined as either (i)  
36  
37 184 any episode of non-invasive ventilation, invasive ventilation, or extracorporeal  
38  
39 185 membrane oxygenation after initial extubation following surgery, or (ii) unexpected  
40  
41  
42 186 failure to extubate following surgery [12].  
43

44 187

### 47 188 **Data collection and quality assurance**

49 189 Data was collected online using the Research Electronic Data Capture (REDCap) web  
50  
51 190 application [26]. Demographic variables recorded consisted of age, sex, and American  
52  
53 191 Society of Anesthesiologists physical status classification (ASA). Age was collected  
54  
55 192 as a categorical variable by deciles of age. ASA at the time of surgery was  
56  
57  
58 193 dichotomized to (i) grades 1-2 and (ii) grades 3-5 for the purpose of analysis, time to  
59  
60

1  
2  
3 194 surgery to (i) under 24 hours, (ii) 24-48 hours, and (iii) over 48 hours, and surgery to  
4  
5 195 (i) hemiarthroplasty, (ii) total hip replacement, (iii) dynamic hip screw, (iv)  
6  
7 196 cannulated screws and (v) intramedullary nail. The timing of SARS-CoV-2 diagnosis  
8  
9 197 was recorded as either preoperative or post-operative.  
10  
11  
12

13 198

14  
15 199 Before data was entered into analysis, site principle investigators were required to  
16  
17 200 confirm all consecutive eligible cases had been completed and uploaded. Where  
18  
19 201 diagnosis was unclear, authors were contacted for clarification.  
20  
21

22 202

### 23 203 **Statistical analysis**

24  
25  
26 204 The study was reported according to STROBE (Strengthening the Reporting  
27  
28 205 of Observational Studies in Epidemiology) guidelines [27]. Proportions are expressed  
29  
30 206 with 95% confidence intervals and the mean and 95% confidence intervals were used  
31  
32 207 where data were assumed to be approximately normally distributed. Fishers exact test  
33  
34 208 was used for categorical data. Non-parametric data was summarised with the median  
35  
36 209 and interquartile ranges. Statistical significance was assessed at the 5% level.  
37  
38  
39

40 210

41  
42 211 The risk of death at 30 days was chosen as the primary outcome for the study. Mixed-  
43  
44 212 effects logistic regression analysis was used to assess the strength and significance of  
45  
46 213 associations between a number of explanatory variables and death within 30-days.  
47  
48 214 Random effects were included in the mixed-effects model to account for the  
49  
50 215 hierarchical structure of the data (individual hospital effects are naturally nested  
51  
52 216 within country effects) and fixed effects were included to adjust for a range of pre-  
53  
54 217 operative variables that may influence mortality in this population, and relevant  
55  
56 218 factors related to the injury or treatment (e.g. type of operation, time from admission  
57  
58  
59  
60

1  
2  
3 219 to operation, type of anaesthetic). An additional analysis of the same factors was  
4  
5 220 undertaken using the same model structure for the secondary outcome of pulmonary  
6  
7 221 complications. This was an exploratory analysis with the significance level set at 5%,  
8  
9 222 with no specific adjustments made for model testing. All analyses were implemented  
10  
11 223 in R (R Core Team (2020). R: A language and environment for statistical computing.  
12  
13 224 R Foundation for Statistical Computing, Vienna, Austria. URL [https://www.R-](https://www.R-project.org/)  
14  
15 225 [project.org/](https://www.R-project.org/)).

16  
17  
18  
19 226

### 20 21 227 **Patient and Public Involvement**

22  
23 228 Patients were not involved in the design, conduct or reporting of this study.  
24  
25  
26  
27  
28  
29  
30  
31  
32  
33  
34  
35  
36  
37  
38  
39  
40  
41  
42  
43  
44  
45  
46  
47  
48  
49  
50  
51  
52  
53  
54  
55  
56  
57  
58  
59  
60

## 229 **Results**

230

### 231 **Population**

232 This study returned 30-day follow up for 1063 patients with proximal femoral  
233 fractures. Data was collected in 174 hospitals from 19 countries (Supplementary  
234 Table S1). Of these, 65.5% were female (696/1063). 7.8% (83/1063) patients were  
235 <70 years old, 17.8% (189/1063) were between 70-79 years, 47.7% (507/1063) were  
236 between 80-89 and 26.7% (284/1063) were 90+ years old.

237

### 238 **Mortality**

239 Overall 30-day mortality was 29.4% (313/1063). With each decile of age, mortality  
240 significantly increased, being highest in those patients >90 years old (38.7%  
241 [110/284],  $p=0.001$ ).

242

243 In an adjusted model (Figure 1), 30-day mortality was associated with male gender  
244 (OR 2.29, 95% CI 1.68-3.13,  $p<0.001$ ), age >80 years (OR 1.60, 95% CI 1.1-2.31,  
245  $p=0.013$ ), diagnosis of dementia (OR 1.57, 95% CI 1.15-2.16,  $p=0.005$ ), chronic  
246 kidney disease (OR 1.73, 95% CI 1.18-2.55,  $p=0.005$ ) and congestive heart failure  
247 (OR 1.62, 95% CI 1.06-2.48,  $p=0.025$ ). 30-day mortality was lower in patients with a  
248 pre-operative diagnosis of SARS-CoV-2 (OR 0.60, 95% CI 0.42-0.85,  $p=0.004$ ).

249 Non-adjusted values are presented in Table S2.

250

### 251 **Pulmonary complications**

252 In an adjusted model (Figure 2), respiratory complications were associated with male  
253 gender (OR 1.7, 95% CI 1.27-2.28,  $p<0.001$ ), diagnosis of dementia (OR 1.34, 95%

1  
2  
3 254 CI 1.01-1.79,  $p=0.044$ ) and congestive heart failure (OR 1.76, 95% CI 1.17-2.63,  
4  
5 255  $p=0.006$ ). The presence of Chronic Obstructive Pulmonary Disorder (COPD) showed  
6  
7 256 no significant association (OR 1.42, 95% CI 0.96-2.09,  $p=0.076$ ).  
8  
9

10 257

## 11 258 **Diagnosis**

12  
13  
14 259 The majority of diagnosis of SARS-CoV-2 was made via PCR swab testing 93.3%  
15  
16 260 (992/1063) (Table S1 & S3) and there was no difference in mortality between those  
17  
18 261 diagnosed clinically ( $p=0.668$ ). The majority of patients received a diagnosis post-  
19  
20 262 operatively 69% (733/1063).  
21  
22  
23

24 263

## 25 264 **Pre-operative variables**

26  
27 265 Pre-operative symptoms (Table S4), including breathlessness, cough and fever ( $>38^{\circ}$   
28  
29 266 Celsius) were not significantly different in patients who were alive or dead at 30 days  
30  
31 267 post-operatively. On examination of pre-operative observations, a high respiratory  
32  
33 268 rate was predictive of mortality (OR 1.73 95% CI 1.18-2.55,  $p=0.025$ ) (Figure 1).  
34  
35 269 However, there was no significant difference in patient's heart rate, systolic or  
36  
37 270 diastolic blood pressure (Table S5, Figure S1) between those who were alive or dead  
38  
39 271 at 30 days.  
40  
41  
42  
43  
44

45 272

46  
47 273 Those patients with ASA grade 3-5 had a significantly higher mortality of 31.4%  
48  
49 274 (281/899) versus ASA of 1-2 of 18.5% (28/151),  $p=0.001$ .  
50

51 275

## 52 276 **Procedures**

53  
54 277 The operations were carried out under a general anaesthetic in 49.6% (527/1063) of  
55  
56 278 patients (Table S6). 67.2% (714/1063) of patients did not require any pre-operative  
57  
58  
59  
60

1  
2  
3 279 oxygen therapy. In this cohort, 31.8% (338/1063) of patients had their operation  
4  
5 280 within 24 hours of presentation to hospital, 21.1% (224/1063) had their operation  
6  
7 281 between 24-47 hours and 19.2% (205/1063) of patients had their operation after 48  
8  
9 282 hours of presentation to hospital.

10  
11  
12 283

13  
14 284 In this cohort, 45.1% (479/1063) of patients underwent hemiarthroplasty with a  
15  
16 285 further 4.2% undergoing total hip replacement (45/1063). For patients who underwent  
17  
18 286 fixation, 26% (276/1063) underwent Dynamic Hip Screw (DHS) fixation, 22.9%  
19  
20 287 (243/1063) patients underwent intramedullary fixation, 0.5% (5/1063) underwent  
21  
22 288 cannulated screw fixation whilst a further 1.4% (15/1053) underwent internal fixation.

23  
24  
25 289

26  
27  
28 290 There was no difference in mortality between patients undergoing general and  
29  
30 291 regional anaesthesia (29.9% [157/527 versus 29.0% [152/524],  $p=0.787$ ). However,  
31  
32 292 there was an increased mortality in those patients requiring pre-operative oxygen  
33  
34 293 therapy (34.3% [115/336] versus 27.2% [194/714],  $p=0.031$ ).

35  
36  
37 294

38  
39 295 There was no significant difference in mortality for patients with delayed operation.

40  
41 296 The highest mortality was for patients operated between 24-47 hours of admission  
42  
43 297 (34.4%, [77/224]) but was not significantly higher than less than those operated after  
44  
45 298 48 hours ( $p=0.220$ ).

46  
47  
48 299

49  
50 300 Mortality was highest in March (33.7%, 159/474) compared to April (27.0%,  
51  
52 301 150/558), and February (11.5%, 3/26),  $p=0.007$  (Table S1).



1  
2  
3 302 **Discussion**  
4

5 303  
6

7 304 The 30-day mortality rate for patients with a peri-operative diagnosis of SARS-CoV-2  
8  
9 305 infection undergoing surgery for proximal femoral fracture is substantial. An overall  
10  
11 306 rate of 29.4% compares to the reported 30-day mortality in the literature for proximal  
12  
13 307 femoral fractures ranging between 3.5-6.8% [2, 28-32]. This rate is higher than found  
14  
15 308 at the one year time point [33]. Further, elderly patients, and those with medical  
16  
17 309 comorbidities such as dementia, chronic kidney disease and congestive heart failure  
18  
19 310 were associated with higher risk of 30-day mortality. Notably, patients with a pre-  
20  
21 311 operative diagnosis of SARS-CoV-2 infection had lower rates of 30-day mortality,  
22  
23 312 likely reflecting early recognition and closer management of these patients. Findings  
24  
25 313 from this study will be useful in guiding clinicians to identify high-risk patients that  
26  
27 314 may warrant closer medical and surgical input during the COVID-19 pandemic.  
28  
29  
30  
31  
32

33 315

34  
35 316 Considering this high mortality, it is critical that patients who present without a  
36  
37 317 diagnosis SARS-CoV-2 with proximal femoral fractures are protected from  
38  
39 318 contracting SARS-CoV-2 in the peri-operative period. A study by Kayani et al. has  
40  
41 319 suggested that half of infections in patients with proximal femoral fractures occur in  
42  
43 320 hospital, as denoted by having negative pre-operative samples [17]. Similarly, a study  
44  
45 321 by Hall et al. has suggested nearly half of cases were due to nosocomial transmission  
46  
47 322 [34]. Within this study, 733 (69%) of infections were diagnosed post-operatively.  
48  
49 323 This may infer that infections have been transferred in hospital, although due to  
50  
51 324 incubation period of the virus, it is hard to know the proportion that contracted the  
52  
53 325 virus prior to presentation or in hospital. [7, 35] Higher mortality was observed in  
54  
55 326 people who had a post-operative diagnosis, which emphasises the critical importance  
56  
57  
58  
59  
60

1  
2  
3 327 of avoiding in-hospital transmission. Hospitals should consider implementation of  
4  
5 328 careful infection control processes to minimise and prevent transmission of SARS-  
6  
7 329 CoV-2 infection. Within the elective setting, the creation of COVID-19-free surgical  
8  
9 330 pathways for elective patients has been shown to reduce infection and subsequent  
10  
11 331 mortality [36-38] and whilst only some of the principles are transferrable to the  
12  
13 332 emergency setting, it demonstrates the value of meticulous infection control processes  
14  
15 333 throughout the hospital stay. Furthermore, patients should be reinforced of methods to  
16  
17 334 reduce risk of transmission in the community after discharge, including (but not  
18  
19 335 limited to) social distancing, isolation and hygiene.  
20  
21  
22  
23  
24  
25

26 337 For those patients presenting with SARS-CoV-2 (either existing diagnosis or clinical  
27  
28 338 findings suggestive of) and a proximal femoral fracture, it is important for data to be  
29  
30 339 used as part of the informed consent process. In patients with multiple high-risk  
31  
32 340 factors such as those who are more elderly, have respiratory and cardiac co-  
33  
34 341 morbidities, non-operative management may be considered following an appropriate  
35  
36 342 discussion with the patient and/or their family. Every year in the UK, 2.5% of hip  
37  
38 343 fractures are treated non-operatively [39]. A study performed before the pandemic  
39  
40 344 reported that the mortality within thirty days for conservatively treated patients was  
41  
42 345 31.3% [40]. We do not know the mortality from non-operative management during  
43  
44 346 the pandemic for patients with SARS-Cov-2, but the particularly high mortality  
45  
46 347 associated with surgery in high-risk groups may change the balance of benefit and  
47  
48 348 harm towards conservative treatment and this should be considered.  
49  
50  
51  
52  
53

54 349  
55  
56 350 The 30-day mortality of 29.4% identified within this study is comparable to published  
57  
58 351 literature, in the UK (range from 16.3%-35.6%) [15-17, 19, 34, 41], Italy (18.75%)  
59  
60

1  
2  
3 352 [14], Spain (30.4%) [13] and the USA (range from 35.3%-56%) [18, 20]. From a  
4  
5 353 study within the UK, the authors also found a correlation between male sex and  
6  
7 354 increased mortality (OR 2.69), which is similar to that demonstrated in this study (OR  
8  
9 355 2.29) [16]. Additionally, another UK study reported having more than three co-  
10  
11 356 morbidities as a risk factor for mortality [17]. This study has specifically delineated a  
12  
13 357 diagnosis of dementia, chronic kidney disease and congestive heart failure as being  
14  
15 358 independent risk factors for mortality. In a study from USA, the authors found those  
16  
17 359 patients who died were older with multiple co-morbidities and this was reflected in  
18  
19 360 statistically significant higher ASA scores in comparison to their negative  
20  
21 361 counterparts [20].  
22  
23  
24  
25  
26  
27

28 363 This study found that there was no significant increase in mortality with delay to  
29  
30 364 surgery. Current guidelines suggest early surgery should be undertaken [42] and this  
31  
32 365 is associated with lower mortality [43]. This would suggest that those patients at the  
33  
34 366 highest risk of mortality can have medical optimisation, if appropriate, and will not  
35  
36 367 result in a higher mortality from SARS-CoV-2 infection. This includes correction of  
37  
38 368 concurrent medical issues often found in this population, examples of which include  
39  
40 369 correction of acute renal failure, electrolyte disturbances and/or anticoagulation  
41  
42 370 related issues. With regards to recovery from SARS-CoV-2 infection, it is important  
43  
44 371 to consider that an increased risk of mortality for those undergoing surgery persists  
45  
46 372 until seven weeks after diagnosis [44]. This risk reduces gradually after two weeks  
47  
48 373 after diagnosis and should be considered.  
49  
50  
51  
52  
53

54 374  
55  
56 375 Similarly, previous studies have found a higher rate of mortality in patients  
57  
58 376 undergoing general versus regional anaesthesia for proximal femoral fractures [45,  
59  
60

1  
2  
3 377 46]. This study reports no difference between general and regional anaesthetic (29.9%  
4  
5 378 versus 29.0%,  $p=0.787$ ). Whilst this was not the primary outcome of this study, this  
6  
7 379 suggests that a positive test for SARS-CoV-2 should not have a large influence on  
8  
9 380 anaesthetic decisions. This should be interpreted with caution in the light of this being  
10  
11 381 an exploratory study. Out of all clinical features, respiratory rate at presentation was  
12  
13 382 associated with higher mortality. Clinicians should focus on this as an important  
14  
15 383 finding when counselling patients of their peri-operative mortality.  
16  
17  
18  
19  
20

21 384  
22 385 This study has also found an increased mortality during the month of March 2020.  
23  
24 386 This corresponds to the peak of caseload of infections internationally [47, 48].  
25  
26 387 Increased circulation of SARS-CoV-2 within countries has shown to increase  
27  
28 388 mortality through higher viral loads [47, 49]. This study validates that surgical  
29  
30 389 patients are particularly susceptible during surge of cases.  
31  
32  
33  
34

35 390  
36 391 This is a large, varied cohort of patients undergoing surgery for a proximal femoral  
37  
38 392 fractures with SARS-Cov-2 infection diagnosed peri-operatively. This study was  
39  
40 393 conducted in multiple centres, internationally, allowing it to be generalisable across  
41  
42 394 populations in other countries.  
43  
44  
45

46 395

#### 47 396 **Limitations**

48  
49 397 This study was conducted in hospitals in the early to mid-phase of the pandemic  
50  
51 398 where routine testing was not available in all participating centres. As such, to be  
52  
53 399 pragmatic, patients were included if a clinical diagnosis was made by the treating  
54  
55 400 physician. Protocols were not standardised for clinical diagnosis and were left the  
56  
57 401 senior treating physician. Laboratory diagnosis was made by qRT-PCR, from which  
58  
59  
60

1  
2  
3 402 false-negative results may have excluded patients from analysis. Indeed, the  
4  
5 403 sensitivity of qRT-PCR testing for has shown to be as low as 32% for throat swabs  
6  
7 404 [50]. However, in patients with negative results and high clinical suspicion of SARS-  
8  
9 405 CoV-2 infection, multiple samples are often taken, including broncho-alveolar lavage.  
10  
11 406 Thus, the number of patients excluded is expected to be low. Whilst this study reports  
12  
13 407 a higher mortality from post-operative diagnosis of SARS-CoV-2 infection, it is  
14  
15 408 unclear whether the infection was contracted pre-operatively or not, as has been  
16  
17 409 discussed above.  
18  
19  
20  
21  
22  
23

24 411 This study does not have a control arm, assessing contemporaneous patients with  
25  
26 412 undergoing an operation for proximal femoral fractures without SARS-CoV-2  
27  
28 413 infection during the height of the pandemic. However, comparison with high-quality  
29  
30 414 pre-pandemic data strongly suggests a substantial increase in mortality. Patients and  
31  
32 415 those who care for them should consider this carefully when making decisions in this  
33  
34 416 common and challenging clinical scenario.  
35  
36  
37  
38  
39

## 40 418 **Conclusion**

41  
42 419  
43  
44 420 Patients undergoing surgery for a proximal femoral fracture with a peri-operative  
45  
46 421 infection of SARS-CoV-2 have a high rate of mortality. The study would support the  
47  
48 422 approach of providing these patients with individualised medical and anaesthetic care,  
49  
50 423 including medical optimisation before theatre. It is imperative to prevent transmission  
51  
52 424 of coronavirus in the hospital setting. Careful pre-operative counselling is needed for  
53  
54 425 those with a proximal femoral fracture and SARS-CoV-2, especially those in the  
55  
56 426 highest risk groups.  
57  
58  
59  
60

1  
2  
3 427 **Tables & Figures**

4 428

5 429 **Fig. 1 Mixed-effects logistic regression model for 30 day mortality**

6 430

7 431

8 432

9 433

10 434

11 435

12 436

13 437

14 438

15 439

16 440

17 441

18 442

19 443

20 444

21 445

22 446

23 447

24 448

25 449

26 450

27 451

28 452

29 453

30 454

31 455

32 456

33 457

34 458

35 459

36 460

37 461

38 462

39 463

40 464

41 465

42 466

43 467

44 468

45 469

46 470

47 471

48 472

49 473

50

51

52

53

54

55

56

57

58

59

60

**Fig. 2. Mixed-effects logistic regression model for pulmonary complications**

**Competing interests**

The collaborative group report no conflicts of interest

**Contributor statement**

CK is the lead author for this manuscript and was responsible for inception, analysis and writing of this manuscript alongside the COVIDSurg Collaborative.

Full list of authors and roles within this research project are available in Supplementary files, titled Authorship (available to editors)

**Funding**

This work was supported by a National Institute for Health Research (NIHR) Global Health Research Unit Grant (NIHR 16.136.79), the Association of Coloproctology of Great Britain and Ireland, Association of Upper Gastrointestinal Surgeons, Bowel Disease Research Foundation, Yorkshire Cancer Research, Sarcoma UK, the British Association of Surgical Oncology, the Vascular Society for Great Britain and Ireland, and the European Society of Coloproctology. The funders had no role in study design, data collection, analysis and interpretation, or writing of this report. The views expressed are those of the authors and not necessarily those of the National Health Service, the NIHR, or the UK Department of Health and Social Care

**Data Sharing**

No additional data available. Requests for raw data can be requested via the corresponding author.

**Ethics Statement**

This observational study collected anonymised routine clinical data, using an established international trainee collaborative model [51]. Within the United Kingdom this was registered as a clinical audit or service evaluation at each participating trust following individual hospital policies and procedures, prior to initiating data collection at that site. In other countries, the principal investigator was responsible for obtaining local approval in line with local and/or national guidelines. In some participating countries, informed patient consent was taken, whilst in others the requirement was waived by local research committees. The lead centre for this manuscript was University Hospitals Coventry & Warwickshire (approval number SE0233). Country-specific guidelines for site set-up were published on a dedicated study website ([www.globalsurg.org/covidsurg](http://www.globalsurg.org/covidsurg)).



1  
2  
3 474 **References**

- 4 475  
5 476 1. Kistler, E.A., et al., *Frailty and short-term outcomes in patients with hip fracture.*  
6 477 *Geriatric orthopaedic surgery & rehabilitation*, 2015. **6**(3): p. 209-214.  
7 478 2. National Hip Fracture Database., *National Hip Fracture Database (NHFD) Annual*  
8 479 *Report 2019*. 2019.  
9 480 3. Dhanwal, D.K., et al., *Epidemiology of hip fracture: worldwide geographic*  
10 481 *variation*. *Indian journal of orthopaedics*, 2011. **45**: p. 15-22.  
11 482 4. Hampton, M., et al., *The effects of a UK lockdown on orthopaedic trauma*  
12 483 *admissions and surgical cases: A multicentre comparative study*. *Bone & Joint*  
13 484 *Open*, 2020. **1**(5): p. 137-143.  
14 485 5. Scott, C.E., et al., *Population mobility and adult orthopaedic trauma services*  
15 486 *during the COVID-19 pandemic: fragility fracture provision remains a priority*.  
16 487 *Bone & Joint Open*, 2020. **1**(6): p. 182-189.  
17 488 6. Lawrence, V.A., et al., *Medical complications and outcomes after hip fracture*  
18 489 *repair*. *Archives of internal medicine*, 2002. **162**(18): p. 2053-2057.  
19 490 7. Huang, C., et al., *Clinical features of patients infected with 2019 novel coronavirus*  
20 491 *in Wuhan, China*. *Lancet*, 2020. **395**(10223): p. 497-506.  
21 492 8. Besnier, E., J.J. Tuech, and L. Schwarz, *We Asked the Experts: Covid-19 Outbreak: Is*  
22 493 *There Still a Place for Scheduled Surgery? "Reflection from Pathophysiological*  
23 494 *Data"*. *World J Surg*, 2020. **44**(6): p. 1695-1698.  
24 495 9. Meftahi, G.H., et al., *The possible pathophysiology mechanism of cytokine storm in*  
25 496 *elderly adults with COVID-19 infection: the contribution of "inflammation-aging"*.  
26 497 *Inflammation Research*, 2020: p. 1-15.  
27 498 10. Chang Liang, Z., et al., *Novel Coronavirus and Orthopaedic Surgery: Early*  
28 499 *Experiences from Singapore*. *J Bone Joint Surg Am*, 2020.  
29 500 11. Thornton, J., *Clinicians are leading service reconfiguration to cope with covid-19*.  
30 501 *Bmj*, 2020. **369**: p. m1444.  
31 502 12. COVIDSurg Collaborative., *Mortality and pulmonary complications in patients*  
32 503 *undergoing surgery with perioperative SARS-CoV-2 infection: an international*  
33 504 *cohort study*. *The Lancet*, 2020.  
34 505 13. Munoz Vives, J.M., et al., *Mortality Rates of Patients with Proximal Femoral*  
35 506 *Fracture in a Worldwide Pandemic: Preliminary Results of the Spanish HIP-COVID*  
36 507 *Observational Study*. *J Bone Joint Surg Am*, 2020.  
37 508 14. Catellani, F., et al., *Treatment of Proximal Femoral Fragility Fractures in Patients*  
38 509 *with COVID-19 During the SARS-CoV-2 Outbreak in Northern Italy*. *J Bone Joint*  
39 510 *Surg Am*, 2020.  
40 511 15. Mamarelis, G., et al., *Mortality in Patients with Proximal Femoral Fracture During*  
41 512 *the COVID-19 Pandemic: A UK Hospital's Experience*. *JBJS Open Access*, 2020. **5**(4).  
42 513 16. Rasidovic, D., et al., *Impact of COVID-19 on clinical outcomes for patients with*  
43 514 *fractured hip: a multicentre observational cohort study*. *Bone & Joint Open*, 2020.  
44 515 **1**(11): p. 697-705.  
45 516 17. Kayani, B., et al., *The effects of COVID-19 on perioperative morbidity and mortality*  
46 517 *in patients with hip fractures*. *Bone Joint J*, 2020. **102-b**(9): p. 1136-1145.  
47 518 18. Egol, K.A., et al., *Increased Mortality and Major Complications in Hip Fracture Care*  
48 519 *During the COVID-19 Pandemic: A New York City Perspective*. *J Orthop Trauma*,  
49 520 2020. **34**(8): p. 395-402.  
50 521 19. Thakrar, A., et al., *Thirty-Day Mortality Rate of Patients With Hip Fractures During*  
51 522 *the COVID-19 Pandemic: A Single Centre Prospective Study in the United Kingdom*.  
52 523 *J Orthop Trauma*, 2020. **34**(9): p. e325-e329.  
53 524 20. LeBrun, D.G., et al., *Hip fracture outcomes during the COVID-19 pandemic: early*  
54 525 *results from New York*. *Journal of orthopaedic trauma*, 2020.

- 1  
2  
3 526 21. Bhangu, A., et al., *Surgical research collaboratives in the UK*. Lancet, 2013.  
4 527 **382**(9898): p. 1091-2.
- 5 528 22. Cevik, M., et al., *Virology, transmission, and pathogenesis of SARS-CoV-2*. BMJ,  
6 529 2020. **371**.
- 7 530 23. Zhou, F., et al., *Clinical course and risk factors for mortality of adult inpatients*  
8 531 *with COVID-19 in Wuhan, China: a retrospective cohort study*. Lancet, 2020.  
9 532 **395**(10229): p. 1054-1062.
- 10 533 24. Abbott, T.E.F., et al., *A systematic review and consensus definitions for*  
11 534 *standardised end-points in perioperative medicine: pulmonary complications*. Br J  
12 535 Anaesth, 2018. **120**(5): p. 1066-1079.
- 13 536 25. Pearse, R.M., et al., *The Prevention of Respiratory Insufficiency after Surgical*  
14 537 *Management (PRISM) Trial. Report of the protocol for a pragmatic randomized*  
15 538 *controlled trial of CPAP to prevent respiratory complications and improve survival*  
16 539 *following major abdominal surgery*. Minerva Anesthesiol, 2017. **83**(2): p. 175-182.
- 17 540 26. Harris, P.A., et al., *Research electronic data capture (REDCap)—a metadata-driven*  
18 541 *methodology and workflow process for providing translational research*  
19 542 *informatics support*. Journal of biomedical informatics, 2009. **42**(2): p. 377-381.
- 20 543 27. Gharaibeh, A., S. Koppikar, and F.J. Bonilla-Escobar, *Strengthening the Reporting*  
21 544 *of Observational Studies in Epidemiology (STROBE) in the International Journal of*  
22 545 *Medical Students*. International Journal of Medical Students, 2014. **2**(2): p. 36-37.
- 23 546 28. Blanco, J.F., et al., *30-day mortality after hip fracture surgery: Influence of*  
24 547 *postoperative factors*. PloS One, 2021. **16**(2): p. e0246963.
- 25 548 29. Carretta, E., et al., *Hip fracture: effectiveness of early surgery to prevent 30-day*  
26 549 *mortality*. International orthopaedics, 2011. **35**(3): p. 419-424.
- 27 550 30. Giannoulis, D., G.M. Calori, and P.V. Giannoudis, *Thirty-day mortality after hip*  
28 551 *fractures: has anything changed?* European Journal of Orthopaedic Surgery &  
29 552 Traumatology, 2016. **26**(4): p. 365-370.
- 30 553 31. Brauer, C.A., et al., *Incidence and mortality of hip fractures in the United States*.  
31 554 *Jama*, 2009. **302**(14): p. 1573-1579.
- 32 555 32. Miller, B.J., X. Cai, and P. Cram, *Mortality rates are similar after hip fractures for*  
33 556 *rural and urban patients*. Clinical Orthopaedics and Related Research, 2012.  
34 557 **470**(6): p. 1763-1770.
- 35 558 33. Mundi, S., et al., *Similar mortality rates in hip fracture patients over the past 31*  
36 559 *years: A systematic review of RCTs*. Acta orthopaedica, 2014. **85**(1): p. 54-59.
- 37 560 34. Hall, A.J., et al., *IMPACT-Scot 2 report on COVID-19 in hip fracture patients: a*  
38 561 *nationwide study of mortality, risk factors for community and hospital acquired*  
39 562 *COVID-19, and suggested care pathways*. The Bone & Joint Journal, 2021. **103**: p.  
40 563 1-10.
- 41 564 35. Phua, J., et al., *Intensive care management of coronavirus disease 2019 (COVID-*  
42 565 *19): challenges and recommendations*. Lancet Respir Med, 2020. **8**(5): p. 506-517.
- 43 566 36. COVIDSurg Collaborative., *Preoperative nasopharyngeal swab testing and*  
44 567 *postoperative pulmonary complications in patients undergoing elective surgery*  
45 568 *during the SARS-CoV-2 pandemic*. The British Journal of Surgery, 2020.
- 46 569 37. Chui, K., A. Thakrar, and S. Shankar, *Evaluating the efficacy of a two-site ('COVID-*  
47 570 *19'and 'COVID-19-free') trauma and orthopaedic service for the management of*  
48 571 *hip fractures during the COVID-19 pandemic in the UK*. Bone & Joint Open, 2020.  
49 572 **1**(6): p. 190-197.
- 50 573 38. COVIDSurg Collaborative., *Elective cancer surgery in COVID-19-free surgical*  
51 574 *pathways during the SARS-CoV-2 pandemic: an international, multicenter,*  
52 575 *comparative cohort study*. Journal of Clinical Oncology, 2020: p. JCO. 20.01933.
- 53 576 39. National Hip Fracture Database. *National Hip Fracture Report*. 2020; Available  
54 577 from:  
55 578 <https://www.nhfd.co.uk/20/NHFDcharts.nsf/vwcharts/Surgery?opendocument>  
56 579 .



- 1  
2  
3 580 40. Moulton, L., et al., *Outcome after conservatively managed intracapsular fractures*  
4 581 *of the femoral neck*. The Annals of The Royal College of Surgeons of England,  
5 582 2015. **97**(4): p. 279-282.  
6 583 41. Mahmood, A., et al., *Coronavirus infection in hip fractures (CHIP) study*. The Bone  
7 584 & Joint Journal, 2021: p. 1-5.  
8 585 42. Hoffenberg, R., et al., *Fractured neck of femur: Prevention and management.*  
9 586 *Summary and recommendations of a report of the Royal College of Physicians.*  
10 587 Journal of the Royal College of Physicians of London, 1989. **23**(1): p. 8-14.  
11 588 43. Rogers, F.B., S.R. Shackford, and M.S. Keller, *Early fixation reduces morbidity and*  
12 589 *mortality in elderly patients with hip fractures from low-impact falls*. Journal of  
13 590 Trauma and Acute Care Surgery, 1995. **39**(2): p. 261-265.  
14 591 44. COVIDSurg. and Globalsurg Collaborative, *Timing of surgery following*  
15 592 *SARS-CoV-2 infection: an international prospective cohort study*. Anaesthesia,  
16 593 2021. **76**(6): p. 748-758.  
17 594 45. Ahn, E.J., et al., *Comparison of general anaesthesia and regional anaesthesia in*  
18 595 *terms of mortality and complications in elderly patients with hip fracture: a*  
19 596 *nationwide population-based study*. BMJ open, 2019. **9**(9): p. e029245.  
20 597 46. Van Waesberghe, J., et al., *General vs. neuraxial anaesthesia in hip fracture*  
21 598 *patients: a systematic review and meta-analysis*. BMC anesthesiology, 2017.  
22 599 **17**(1): p. 87.  
23 600 47. Ferguson, N., et al., *Report 9: Impact of non-pharmaceutical interventions (NPIs)*  
24 601 *to reduce COVID19 mortality and healthcare demand*. 2020.  
25 602 48. University, J.H. *Coronavirus Resource Centre*. 2021; Available from:  
26 603 <https://coronavirus.jhu.edu/data>.  
27 604 49. Fajnzylber, J., et al., *SARS-CoV-2 viral load is associated with increased disease*  
28 605 *severity and mortality*. Nature communications, 2020. **11**(1): p. 1-9.  
29 606 50. Wang, W., et al., *Detection of SARS-CoV-2 in Different Types of Clinical Specimens*.  
30 607 *Jama*, 2020. **323**(18): p. 1843-1844.  
31 608 51. COVIDSurg Collaborative, *COVIDSurg Protocol*. 2020.  
32  
33  
34  
35  
36  
37  
38  
39  
40  
41  
42  
43  
44  
45  
46  
47  
48  
49  
50  
51  
52  
53  
54  
55  
56  
57  
58  
59  
60

## COVIDSurg authorship list

**Operations Committee:** Kwabena Siaw-Acheampong, Leah Argus, Daoud Chaudhry, Brett E Dawson, James C Glasbey, Rohan R Gujjuri, Conor S Jones, Sivesh K Kamarajah, Chetan Khatri, James M Keatley, Samuel Lawday, Elizabeth Li, Harvinder Mann, Ella J Marson, Kenneth A Mclean, Maria Picciochi, Elliott H Taylor, Abhinav Tiwari, Joana FF Simoes, Isobel M Trout, Mary L Venn, Richard JW Wilkin, Aneel Bhangu\*, Dmitri Nepogodiev\*

\*Co-chairs

**Dissemination Committee:** Irida Dajti (Albania), Arben Gjata (Albania), Luis Boccalatte (Argentina), Maria Marta Modolo (Argentina), Daniel Cox (Australia), Peter Pockney (Australia), Philip Townend (Australia), Felix Aigner (Austria), Irmgard Kronberger (Austria), Kamral Hossain (Bangladesh), Gabrielle VanRamshorst (Belgium), Ismail Lawani (Benin), Gustavo Ataide (Brazil), Glauco Baiocchi (Brazil), Igor Buarque (Brazil), Muhammad Gohar (Bulgaria), Mihail Slavchev (Bulgaria), Arnav Agarwal (Canada), Amanpreet Brar (Canada), Janet Martin (Canada), Maria Marta Modolo (Chile), Maricarmen Olivos (Chile), Jose Calvache (Colombia), Carlos Jose Perez Rivera (Colombia), Ana Danic Hadzibegovic (Croatia), Tomislav Kopjar (Croatia), Jakov Mihanovic (Croatia), Jaroslav Klat (Czech Republic), René Novysedlak (Czech Republic), Peter Christensen (Denmark), Alaa El-Hussuna (Denmark), Sylvia Batista (Dominican Republic), Eddy Lincango (Ecuador), Sameh H Emile (Egypt), Mengistu Gebreyohanes Mengesha (Ethiopia), Dr.Samuel Hailu (Ethiopia), Hailu Tamiru (Ethiopia), Joonas Kauppila (Finland), Alexis Arnaud (France), Markus Albertsmeiers (Germany), Hans Lederhuber (Germany), Markus Löffler (Germany), Stephen Tabiri (Ghana), Symeon Metallidis (Greece), Georgios Tsoulfas (Greece), Maria Aguilera Lorena (Guatemala), Gustavo Grecinos (Guatemala), Tamas Mersich (Hungary), Daniel Wettstein (Hungary), Dhruv Ghosh (India), Gabriele Kembuan (Indonesia), Peiman Brouk (Iran), Mohammad Khosravi (Iran), Masoud Mozafari (Iran), Ahmed Adil (Iraq), Helen M Mohan (Ireland), Oded Zmora (Israel), Marco Fiore (Italy), Gaetano Gallo (Italy), Francesco Pata (Italy), Gianluca Pellino (Italy), Sohei Sato (Japan), Faris Ayasra (Jordan), Mohammad Chaar (Jordan), Ildar R Fakhradiyev (Kazakhstan), Mohammad Jamal (Kuwait), Muhammed Elhadi (Libya), Aiste Gulla (Lithuania), April Roslani (Malaysia), Laura Martinez (Mexico), Antonio Ramos De La Medina (Mexico), Oumaima Outani (Morocco), Pascal Jonker (Netherlands), Schelto Kruijff (Netherlands), Milou Noltes (Netherlands), Pieter Steinkamp (Netherlands), Willemijn van der Plas (Netherlands), Adesoji Ademuyiwa (Nigeria), Babatunde Osinaike (Nigeria), Justina Seyi-olajide (Nigeria), Emmanuel Williams (Nigeria), Sofija Pejškova (North Macedonia), Knut Magne Augestad (Norway), Kjetil Soreide (Norway), Zainab Al Balushi (Oman), Ahmad Qureshi (Pakistan), Raza Sayyed (Pakistan), Mustafa Abu Mohsen Daraghme (Palestine), Sadi Abukhalaf (Palestine), Moises Cukier (Panama), Hugo Gomez (Paraguay), Sebastian Shu (Peru), Ximena Vasquez (Peru), Marie Dione Parreno-Sacdalan (Philippines), Piotr Major (Poland), José Azevedo (Portugal), Miguel Cunha (Portugal), Irene Santos (Portugal), Ahmad Zarour (Qatar), Eduard-Alexandru Bonci (Romania), Ionut Nego (Romania), Sergey Efetov (Russia), Andrey Litvin (Russia), Faustin Ntirenganya (Rwanda), Ehab AlAmeer (Saudi Arabia), Dejan Radenkovic (Serbia), Frederick Koh Hong Xiang (Singapore), Chew Min Hoe (Singapore), James Ngu Chi Yong (Singapore), Rachel Moore (South Africa), Ncamsile Nhlabathi (South Africa), Ruth Blanco Colino (Spain), Ana Minaya Bravo (Spain), Ana Minaya-Bravo (Spain), Umesh Jayarajah (Sri Lanka), Dakshitha Wickramasinghe (Sri Lanka), Mohammed Elmujtaba (Sudan), William Jebri (Sweden), Martin Rutegård (Sweden), Malin Sund (Sweden), Arda Isik (Turkey), Sezai Leventoğlu (Turkey), Tom EF Abbott (UK), Ruth Benson (UK), Ed Caruna (UK), Sohini Chakrabortee (UK), Andreas Demetriades (UK), Anant Desai (UK), Thomas D Drake (UK), John G Edwards (UK), Jonathan P Evans (UK), Samuel Ford (UK), Christina Fotopoulou (UK), Ewen Griffiths (UK), Peter Hutchinson (UK), Michael D Jenkinson (UK), Tabassum Khan (UK), Stephen Knight (UK), Angelos Koliass (UK), Elaine Leung (UK), Siobhan McKay (UK), Lisa Norman (UK), Riinu Ots (UK), Vidya Raghavan (UK), Keith Roberts (UK), Andrew Schache (UK), Richard Shaw (UK), Katie Shaw (UK), Neil Smart (UK), Grant Stewart (UK), Sudha Sundar (UK), Dale Vimalchandran (UK), Naomi Wright (UK), Sattar Alshryda (United Arab Emirates), Osaid Alser (United States), Kerry Breen (United States), Ian Ganly (United States), Haytham Kaafarani (United States), Brittany Kendall (United States), Hassan Mashbari (United States), Hamza Al Naggari (Yemen), Dennis Mazingi (Zimbabwe), EuroSurg, European Society of Coloproctology (ESCP), GlobalSurg, GlobalPaedSurg, ItsURG, PTSurg, SpainSurg, Italian Society of Colorectal Surgery (SICCR), Association of Surgeons in Training (ASiT), Irish Surgical Research Collaborative (ISRC), Joana FF Simoes (Chair).

**Collaborators (\*asterix indicates principle investigator):** Dajti I (University Hospital Center Nene Tereza, Albania); Valenzuela JI\* (Hospital Velez Sarsfield, Argentina); Boccalatte LA\*, Gemelli NA, Smith

1  
2  
3 DE (Hospital Italiano De Buenos Aires, Argentina); Dudi-Venkata NN, Kroon HM\*, Sammour T (Royal  
4 Adelaide Hospital, Australia); Roberts M\*, Mitchell D\*, Lah K\*, Pearce A, Morton A (Royal Brisbane and  
5 Women's Hospital, Australia); Dawson AC\*, Drane A (Gosford Hospital, Australia); Sharpin C\*, Nataraja  
6 RM\*, Pacilli M (Monash Childrens Hospital, Australia); Cox DRA, Muralidharan V\*, Riddiough GE, Clarke  
7 EM, Jamel W, Qin KR (Austin Hospital, Australia); Pockney P\*, Cope D, Egoroff N, Lott N (John Hunter  
8 Hospital, Australia); Putnis S, De Robles S, Ang Z (Wollongong Public Hospital, Wollongong, Australia);  
9 Mitteregger M, Uranitsch S, Stiegler M, Seitinger G, Aigner F\* (Krankenhaus der Barmherzigen Brüder  
10 Graz, Austria); Lumenta DB\*, Nischwitz SP, Richtig E, Pau M, Srekl-Filzmaier P, Eibinger N, Michelitsch  
11 B, Fediuk M, Papinutti A, Seidel G, Kahn J, Cohnert TU (Medical University of Graz, Austria); Messner F,  
12 Öfner D\* (Medical University of Innsbruck, Austria); Presl J\*, Varga M, Weitzendorfer M, Emmanuel K  
13 (Paracelsus Medical University, Salzburg, Austria); Binder AD (Universitätsklinikum Tulln, Tulln, Austria);  
14 Zimmermann M, Holawe S, Nkenke E, Grimm C, Kranawetter M (Medical University of Vienna, Vienna,  
15 Austria); Rahman Mitul A\*, Islam N, Karim S (Dhaka Shishu (Children) Hospital, Bangladesh); Komen  
16 N\*, Putnis S, De Robles S, Ang E (University Hospital Antwerp (UZA), Edegem, Belgium); De Praetere  
17 H\*, Tollens T, Schols G, Smets C, Haenen L (Imelda Hospital, Bonheiden, Belgium); Quintens J, Van  
18 Belle K\* (Europe Hospitals, Belgium); Van Ramshorst GH\*, Pattyn P, Desender L, Martens T, Van de  
19 putte D (Ghent University Hospital, Belgium); Lerut P\*, Grimmonprez A, Janssen M, De Smul G, Wallaert  
20 P (AZ Groeninge, Belgium); Van den Eynde J, Oosterlinck W\*, Van den Eynde R, Sermon A,  
21 Boeckxstaens A, Cordonnier A, De Coster J, Jaekers J, Politis C, Miserez M (UZ Leuven, Belgium);  
22 Duchateau N, De Gheldere C\* (Heilig Hart Ziekenhuis Lier, Belgium); Flamey N, Pattyn P\* (AZ Delta,  
23 Belgium); Christiano A\*, Guidi B, Minussi AL, Castro S, Okoba W, Maldonado FHR, Oliveira P, Baldasso  
24 T, Santos L (Fundação Centro Médico De Campinas, Brazil); Gomes GMA, Buarque IL, Pol-Fachin L,  
25 Bezerra TS, Barros AV\*, da Silva AMR, Leite ALS, Silvestre DWA, Ferro CC (Hospital Santa Casa De  
26 Misericórdia De Maceió, Brazil); Araujo MS\*, Lopes LM, Damasceno PD, Araujo DHS (Hospital  
27 Universitário Antonio Pedro, Brazil); Laporte G\*, Salem MC (Irmandade Da Santa Casa De Misericórdia  
28 De Porto Alegre, Brazil); Guimaraes-Filho, MAC (Pedro Ernesto University Hospital, Brazil); Nacif L\*  
29 (Hospital Nove De Julho, Brazil); Flumignan RLG\*, Nakano LCU, Kuramoto DAB, Aidar ALS, Pereda  
30 MR, Correia RM, Santos BC, Carvalho AA, Amorim JE, Guedes Neto HJ, Areias LL, Sousa AF,  
31 Flumignan CDQ, Lustre WG, Moreno DH, Barros-Jr N, Baptista-Silva JCC (Hospital São Paulo, Brazil);  
32 Matos LL\*, Kowaski LP, Kulcsar MAV, Nunes KS, Teixeira MF (Instituto do Câncer do Estado de São  
33 Paulo, São Paulo, Brazil); Nunes RL\*, Ijichi TR, Kim NJ, Marreiro A, Muller B, Barakat Awada J (Notre  
34 Dame Intermédica - Hospital Salvalus, Brazil); Baiocchi G\*, Kowalski LP\*, Vartanian JG, Makdissi FB,  
35 Aguiar Jr S\*, Marques N, Carvalho GB, Marques TMDM, Abdallah EA, Zurstrassen CE\*, Gross JL\*,  
36 Zequi SC\*, Gonçalves BT, Santos SS, Duprat JP, Coimbra FJF\* (A.C. Camargo Cancer Center, Brazil);  
37 Cicco R\* (Instituto de Câncer Dr Arnaldo Vieira de Carvalho, São Paulo, Brazil); Takeda F, Cecconello I,  
38 Ribeiro Junior U (Instituto Do Câncer De Estado De São Paulo, Brazil); Gatti A\*, Oliva R, Nardi C  
39 (Hospital Geral De Pirajussara, Brazil); Slavchev M\*, Atanasov B, Belev N (University Hospital  
40 Eurohospital, Plovdiv, Bulgaria); Dell A, Bigam D\*, Dajani K, Al Riyami S (University of Alberta Hospital,  
41 Canada); Martin J\*, Cheng D, Yang H, Fayad A (London Health Sciences Centre and St Josephs Health  
42 Care London, Canada); Carrier FM\*, Amzallag E, Desroches J, Ruel M (Centre hospitalier de l'Université  
43 de Montréal, Canada); Caminsky NG, Boutros M\*, Moon J, Wong EG, Vanounou T, Pelletier J, Wong S,  
44 Girsowicz E, Bayne J, Obrand D, Gill H, Steinmetz O, MacKenzie K, Lukaszewski M, Jamjoum G (Jewish  
45 General Hospital, Canada); Richebé P, Verdonck O, Discepola S, Godin N, Idrissi M (Hôpital  
46 Maisonneuve-Rosemont, Canada); Briatico D, Sharma S, Talwar G, Bailey K (McMaster Children's  
47 Hospital, Hamilton, Ontario, Canada); Lecluyse V\* (Hôpital du Sacré-Cœur-de-Montréal, Canada); Côté  
48 G (Centre hospitalier universitaire Sainte-Justine, Canada); Demyttenaere S\*, Garfinkle R, Boutros M\*  
49 (St. Mary's Hospital, Canada); Kouyoumdjian A, Boutros M\*, Dumitra S, Moon J, Wong EG, Khwaja K,  
50 Luo L, Lukaszewski M, Gill H, Berry G, Liberman AS, Girsowicz E, Bayne J, Obrand D, Steinmetz O,  
51 MacKenzie K, Schmid S, Spicer J, Al Farsi M\* (McGill University Health Center, Canada); Abou-Khalil J  
52 (The Ottawa Hospital, Canada); Couture E\*, Mohammadi S, Tremblay H, Gagné N, Bergeron A (Institut  
53 universitaire de cardiologie et de pneumologie de Québec, Canada); Turgeon Af\*, Costerousse O,  
54 Bellemare D, Babin C, Blier C (Centre hospitalier universitaire de Québec, Canada); Wood ML, Persad  
55 A, Groot G\*, Pham H (Saskatoon City Hospital/Royal University Hospital/St. Paul's Hospital, Canada);  
56 D'Aragon F\*, Carbonneau E, Bouchard M, Masse M, Pesant F, Héroux J (Centre hospitalier universitaire  
57 de Sherbrooke, Canada); Karanicolas P\*, Hallet J, Nadler A, Nathens A (Sunnybrook Hospital, Canada);  
58 Ko M\*, Brar A (St. Joseph's Health Centre, Canada); Mayson K\* (Vancouver General Hospital, Canada);  
59 Kidane B\*, Srinathan S (Health Sciences Centre, Canada); Escudero MI\*, Reyes JT (Hospital Clinico  
60 Universidad De Chile/ Hospital San Jose, Chile); Modolo MM\*, Ramirez Nieto P, Sepulveda R, Bolbarán  
A, Molero A, Ruiz I (Barros Luco Trudeau, Chile); Reyes GP\*, Salas R, Suazo C (Hospital del Salvador,  
Chile); Muñoz R\*, Grasset E\*, Inzunza M, Besser N, Irarrázaval MJ, Jarry C, Bellolio F, Romero Manqui



CA, Ruiz Esquide M (Hospital Clínico Universidad Católica, Chile); Fuentes T\*, Campos J (Hospital Sotero Del Rio, Chile); Perez Rivera CJ\*, Cabrera PA (Fundacion Cardioinfantil-Instituto de Cardiología, Colombia); Pinilla RE\*, Guevara O, Jimenez Ramirez LJ, Velasquez Cuasquen BG, Herrera Mora DR, Bonilla A, Diaz S\*, Manrique E, Facundo H, Velez Bernal JL, Ángel J, García M, Guzmán L, Lehmann C, Cervera S, Trujillo Sanchez LM (Instituto Nacional De Cancerología, Colombia); Guevara R\*, Valbuena D, Suarez L, Jimenez G, Velandia A, Vargas J, Espinosa J, Rey S (Clínica Universitaria Colombia, Bogotá., Colombia); Mendoza Quevedo Jairo (Subred Sur Occidente de Kennedy (Hospital de Kennedy), Bogota, Colombia); Calvache JA\*, Orozco-Chamorro CM, Sánchez-Gómez TA, Rojas-Tejada DA (Hospital Universitario San José, Popayán, Colombia); Mihanovic J\*, Bakmaz B, Rakvin I, Sulen N, Andabaka T (Zadar General Hospital, Croatia); Luksic I\*, Mamic M (University Hospital Dubrava, Zagreb, Croatia); Martinek L, Skrovina M\* (Hospital & Oncological Centre Novy Jicin, Czechia); Žatecký J\*, Peteja M (Slezská nemocnice v Opavě, p.o., Czechia); Kristensen HØ, Mekhael M, Christensen P\*, Westh L (Aarhus University Hospital, Denmark); Smith H\*, Haugstvedt AF, Jönsson ML (Bispebjerg Hospital, Denmark); Crespo A, Batista S\*, Rodriguez-Abreu J\*, Tactuk N, Diaz-Delgado PJ, Rivas R (Cedimat - Centro De Diagnóstico, Medicina Avanzada, Laboratorio Y Telemedicina, Dominican Republic); Sarmiento-Bobadilla JA (Hospital General Norte de Guayaquil, Guayaquil, Ecuador); Ashoush F, Samir Abdelaal A, Qatora MS, Elsayed Hewalla ME, Metwalli M, Atta R, Abdelmajeed A, Abosamak NE, Sabry A\*, Shehata S\* (Alexandria Main University Hospital, Egypt); Sallam I\*, Amira G, Sherief M, Sherif A (Misr Cancer Center, Egypt); Salem H\*, Hamdy R, Aboukassem H, Ghaly G\*, Sherif G, Morsi A, Abdelrahman A (National Cancer Institute, Egypt); Omnia Ahmed (Coptic Hospital, Cairo, Egypt); Tawheed A, El Kassas M\*, Omar W (Endemic Medicine Department, Faculty of Medicine, Helwan University, Egypt); Abdelsamed A, Seleim A, Salem H\*, Azzam AY\* (Al Azhar University Hospitals, Egypt); EIFiky M\*, Nabil A (Kasr Alainy Faculty of Medicine, Cairo University, Egypt); Ibraheem M\*, Ghaly G, ELDeeb M, Fawzy M (Baheya Center for Early detection and Treatment of Breast Cancer , Egypt); Hamed H\* (Elkheir Hospital, Egypt); Emile S\*, Elfalal A, Elfeki H, Shalaby M, Sakr A (Mansoura University Hospital, Egypt); Alrahawy M\*, Atif H, Sakr A, Soltan H (Menofiya University Hospital, Egypt); Sayed AK, Salah A, Atiya A\* (Minia University Hospital, Egypt); Wassim K\* (Quwaysna Central Hospital, Egypt); Abbas AM, Abd Elazeem HAS, Abd-Elkariem AY, Abd-Elkarem MM, Alaa S, Ali AK, Ashraf M, Ayman A, Azizeldine MG, Elkhayat H, Emad Mashhour A, Gaber M, Hamza HM, Hawal I, Hetta HF, Elghazaly SM, Mohammed MM, Monib FA, Nageh MA, Saad A, Saad MM, Shahine M, Yousof EA, Youssef A (Assiut University Hospital, Assiut, Egypt); Esmail E\*, Khalaf M (Kafr Elzyat Hospital, Egypt); Eldaly A\* (El-Menshawy Hospital, Egypt); Ghoneim A\*, Hawila A, Badr H, Elhalaby I, Abdel-bari M, Elbahnasawy M, Hamada MK, Morsy MS, Hammad M, Hammad M, Essa M, Fayed MT, Elzoghby M, Rady M, Hamad O, Salman S, Sarsik S, Abd-elsalam S, Gamal Badr S, El-Masry Y (Tanta University Hospital, Egypt); Moahmmed MMH (Zagazig University Hospitals, Zagazig, Egypt); Hailu S\*, Wolde A, Mengesha M, Nida S, Workneh M, Y Ahmed M, Fisseha T, Kassa D, Zeleke H, Admasu A, Laeke T, Tirsit A, Gessesse M, Addissie A (Tikur Anbessa (Black Lion) Hospital-Addis Ababa University, Ethiopia); Bekele K\* (Maddawalabu University Goba Referral Hospital, Ethiopia); Kauppila JH\*, Sarjanoja E (Länsi-Pohja Central Hospital, Finland); Testelin S\*, Dakpé S, Devauchelle B, Bettoni J, Lavagen N (CHU Amiens, France); Schmitt F\*, Lemée JM, Boucher S, Breheret R, Kün-Darbois JD, Kahn A, Gueutier A, Bigot P (CHU Angers, France); Borraccino B (Centre Hospitalier Auxerre, Auxerre, France); Lakkis Z\*, Doussot A, Heyd B, Manfredelli S, Mathieu P, Paquette B, Turco C, Barrabe A, Louvrier A (CHU Besançon, France); Moszkowicz D\*, Giovinazzo D, Bretagnol F (Hôpital Louis-Mourier - Ap-Hp, France); Police A\*, Charre L, Volpin E, Braham H, El Arbi N, Villefranque V, Bendjemar L (Hôpital Simone Veil, France); Girard E\*, Abba J, Trilling B (CHU Grenoble-Alpes, Hôpital Michallon, France); Chebaro A\*, Lecolle K, Truant S, El Amrani M, Zerbib P, Pruvot FR, Mathieu D, Surmei E, Mattei L, Marin H (CHU Lille, France); Christou N, Ballouhey Q\*, Ferrero P, Coste Mazeau P, Tricard J, Barrat B, Taibi A, Usseglio J, Laloze J, Salle H, Fourcade L (Chu Limoges, France); Duchalais E\*, Regenet N, Rigaud J, Waast D, Denis W, Malard O, Buffenoir K, Espitalier F, Ferron C, Varenne Y, Crenn V, De Vergie S, Cristini J, Samarut E (Nantes University Hospital, France); Tzedakis S\*, Bouche PA\*, Gaujoux S (Hôpital Cochin - Aphp, France); Kantor E (AP-HP Hopital Bichat Claude Bernard, Paris, France); Gossot D, Seguin-Givelet A\*, Fuks D, Grigoroïu M, Sanchez Salas R, Cathelineau X, Macek P, Barbé Y, Rozet F, Barret E, Mombet A, Cathala N, Brian E, Zadegan F, Conso C (Institut Mutualiste Montsouris, France); Blanc T\*, Broch A, Sarnacki S, (Necker Enfants Malades University Children Hospital - APHP, Paris ; Université de Paris, Paris, France); Ali L, Bonnard A, Peycelon M\* (Robert-Debré Children University Hospital - APHP, Paris ; Université de Paris, Paris, France); Hervieux E\*, Clermidi P, Maisonneuve E, Aubry E, Thomin A, Langlais T (Hôpital Trousseau - Aphp, France); Passot G\*, Glehen O, Cotte E, Lifante JC (Hopital Lyon Sud, Pierre Bénite, France); De Simone B\*, Chouillard E\* (Centre Hospitalier Intercommunal Poissy Saint Germain En Laye, France); Arnaud AP\*, Violas P (CHU Rennes - Hôpital Sud, France); Bergeat D, Merdrignac A, Arnaud AP (Chu Rennes - Hopital Pontchaillou, France);

1  
2  
3  
4  
5  
6  
7  
8  
9  
10  
11  
12  
13  
14  
15  
16  
17  
18  
19  
20  
21  
22  
23  
24  
25  
26  
27  
28  
29  
30  
31  
32  
33  
34  
35  
36  
37  
38  
39  
40  
41  
42  
43  
44  
45  
46  
47  
48  
49  
50  
51  
52  
53  
54  
55  
56  
57  
58  
59  
60

Scalabre A\*, Perotto LO, Le Roy B, Haddad E, Vermersch S (Chu Saint Etienne, France); Ezanno AC\*, Barbier O, Vigouroux F, Malgras B, Aime A (Hia Begin, France); Seeliger B\*, Mutter D, Philouze G, Pessaux P (IHU-Strasbourg / Strasbourg University Hospitals, France); Germain A\*, Chanty H, Ayav A (CHRU Nancy, France); Kassir R\*, Von theobald P, Sauvat F (CHU Reunion, France); O'Connor J\*, Mayombo Idiata M, O'Connor Z, Tchoba S (Bongolo Hospital, Gabon); Modabber A\*, Winnand P, Hölzle F (University Hospital Aachen, Germany); Sommer B, Shiban E, Wolf S, Anthuber M\*, Sommer F (University Hospital Augsburg, Germany); Kaemmerer D\*, Schreiber T (Zentralklinik Bad Berka, Germany); Kamphues C\*, Lauscher JC, Schineis C, Loch FN, Beyer K (Charité University Medicine, Campus Benjamin Franklin, Germany); Nasser S, Sehoul J\* (Charité Comprehensive Cancer Center, Germany); Höhn P, Braumann C\*, Reinkemeier F, Uhl W (St Josef-Hospital, Bochum, Germany); Weitz J, Bork U\*, Welsch T, Praetorius C, Korn S, Distler M (University Hospital Carl Gustav Carus, Technical University Dresden, Germany); Fluegen G, Knoefel WT, Vay C\* (University Hospital Duesseldorf, Germany); Golcher H, Grützmann R\*, Binder J (Universitätsklinikum Erlangen, Germany); Meister P\*, Gallinat A, Paul A (University Hospital Essen, Essen, Germany); Schnitzbauer AA\*, Thoenissen P, El Youzouri H, Schreckenbach T, Nguyen TA (Frankfurt University Hospital, Goethe University, Frankfurt, Germany); Eberbach H\*, Bayer J\*, Erdle B, Sandkamp R (Medical Center – Albert-Ludwigs-University of Freiburg, Faculty of Medicine, Germany); Nitschke C, Izbicki J, Uzunoglu FG\*, Koenig D, Gosau M, Böttcher A, Heuer A, Klatte TO, Priemel M, Betz CS, Burg S, Möckelmann N, Busch CJ, Bewarder J, Zeller N, Smeets R, Thole S, Vollkommer T, Speth U, Stangenberg M (University Medical Center Hamburg-Eppendorf, Germany); Hakami I\*, Boeker C, Mall J\* (KRH Nordstadt-Siloah Hospitals, Hannover, Germany); Schardey HM, von Ahnen T\*, von Ahnen M, Brunner U (Agatharied Hospital, Hausham, Germany); Taping C\*, Kneser U, Hirche C, Jung M, Kowalewski KF (BG Trauma Center Ludwigshafen, Germany); Kienle P\* (Theresienkrankenhaus, Mannheim, Germany); Reissfelder C, Seyfried S\*, Herrle F, Hardt J, Galata C, Birgin E, Rahbari N, Vassos N (Mannheim University Medical Center (Universitätsmedizin Mannheim), Germany); Stoleriu MG\*, Hatz R (Asklepios Pulmonary Hospital, Munich Gauting, Germany); Albertsmeier M\*, Börner N, Lampert C, Werner J (Department of General, Visceral and Transplantation Surgery, Ludwig-Maximilians-Universität Munich, Munich, Germany); Kuehlmann B, Prantl L (University Hospital Regensburg, Regensburg, Germany); Brunner SM\*, Schlitt HJ, Brennfleck F, Pfister K\*, Oikonomou K (University Medical Center Regensburg, Department of Surgery, Germany); Reinhard T, Nowak K\* (RoMed Klinikum Rosenheim, Germany); Ronellenfisch U\*, Kleeff J, Delank KS, Michalski CW, Szabo G (University Hospital Halle (Saale), Germany); Widyaningsih R, Stavrou GA (Klinikum Saarbrücken, Germany); Bschorer R\*, Mielke J, Peschel T (Helios Kliniken Schwerin, Germany); Königsrainer A\*, Quante M, Löffler MW, Yurttas C (University Hospital Tübingen, Department of General, Visceral and Transplant Surgery, Germany); Doerner J\*, Seiberth R (Helios Universitätsklinikum Wuppertal (Universität Witten/Herdecke), Germany); Bouchagier K\*, Klimopoulos S, Paspaliari D, Stylianidis G (Evangelismos General Hospital, Greece); Syllaios A, Baili E, Schizas D, Liakakos T, Charalabopoulos A\*, Zografos C, Spartalis E (Laiko University Hospital, Greece); Manatakis DK\*, Tasis N, Antonopoulou MI (Athens Naval and Veterans Hospital, Greece); Xenaki S\*, Xynos E\*, Chrysos E, Athanasakis E, Tsiaousis J (University Hospital of Heraklion Crete and Interclinic Hospital of Crete, Greece); Losteridis E\*, Tourountzi P (Kavala General Hospital, Greece); Tzovaras G\*, Tepetes K, Zacharoulis D, Baloyiannis I, Perivoliotis K, Hajioannou J\*, Korais C, Gkrinia E, Skoulakis CE, Saratziotis A, Koukoura O, Symeonidis D, Diamantis A (General University Hospital of Larissa, Greece); Tsoulfas G, Christou CD, Tooulas A, Papadopoulos V\*, Anthoulakis C, Grimbizis G, Zouzoulas D, Tsolakidis D (Papageorgiou General Hospital, Greece); Tatsis D, Christidis P, Loutzidou L, Ioannidis O\*, Astreidis I, Antoniou A, Antoniadis K\*, Vachtsevanos K, Paraskevopoulos K, Kalaitidou I, Alexoudi V, Stavroglou A, Mantevas A, Michailidou D, Grivas T, Deligiannidis D, Politis S, (George Papanikolaou General Hospital of Thessaloniki, Greece); Barrios Duarte A\*, Portilla AL, Lowey MJ, Recinos G, Lopez Muralles I (Hospital General De Enfermedades, Guatemala); Siguantay MA\* (Hospital Roosevelt, Guatemala City, Guatemala); Estrada EE\*, Aguilera-Arévalo ML\*, Cojulun JM, Echeverría-Dávila G (Hospital General San Juan De Dios, Guatemala City, Guatemala); Marín C\*, Icaza de Marín GC\* (Hospital Regional De Zacapa, Guatemala); Kok SY, Joeng HKM, Chan LL, Lim D (United Christian Hospital, Hong Kong); Novak Z\*, Echim T (National Institute of Oncology, Hungary); Suszták N, Banky B\* (Szent Borbála Kórház, Hungary); Kembuan G, Pajan H, Islam AA\* (Rsud Wahidin Sudirohusodo, Indonesia); Rahim F (Baghaei Hospital, Iran); Safari H (Golestan Hospital & Ahvaz Jundishapur University of Medical Sciences, Iran); Mozafari M, Brouki Milan P\*, Tizmaghz A, Rezaei Tavirani M (Firoozabadi Hospital, Iran); Ahmed A (Baghdad Medical City, Iraq); Hussein R\* (Zafaraniyah General Hospital, Iraq); Fleming C, O'Brien S, Kayyal MY, Daly A, Killeen S, Corrigan M\* (Cork University Hospital, Ireland); De Marchi J, Hill A\*, Farrell T, Davis NF, Kearney D, Nelson T (Beaumont Hospital, Ireland); Maguire PJ\*, Barry C\*, Farrell R, Smith LA, Mohan HM, Mehigan BJ, McCormick P, Larkin JO\*, Fahey BA, Rogers A, Donlon N, O'Sullivan H, Nugent T, Reynolds JV\*, Donohue C, Shokuhi P, Ravi N,

1  
2  
3 Fitzgerald C, Lennon P, Timon C, Kinsella J, Smith J, Boyle T, Alazawi D, Connolly E, Butt W, Croghan  
4 SM, Manecksha RP (St. James's Hospital, Ireland); Fearon N\*, Winter D\*, Heneghan H\*, Maguire D,  
5 Gallagher T, Conlon K, Kennedy N, Martin S, Kennelly R, Hanly A, Ng KC, Fagan J, Geary E, Cullinane  
6 C, Hanly A, Carrington E, Geraghty J, McDermott E, Pritchard R, McPartland D, Boland M, Stafford A,  
7 Maguire D, Geoghegan J (St Vincent's University Hospital, Ireland); Elliott JA\*, Ridgway PF, Gillis AE,  
8 Bass GA, Neary PC, O'Riordan JM, Kavanagh DO, Reynolds IS, Conlon K, Joyce DP, Boyle E, Egan B,  
9 Whelan M, Elkady R, Tierney S, Connelly TM, Earley H, Umair M, O'Connell C, Manecksha RP, Thomas  
10 AZ, Rice D, Madden A, Bashir Y, Creavin B (Tallaght Hospital, Ireland); Cullivan O, Owens P, Canas-  
11 Martinez A, Murphy C, Pickett L, Murphy B, Mastrosimone A, Beddy D, Arumugasamy M, Allen M,  
12 Aremu M\* (Connolly Hospital Blanchardstown, Ireland); McCarthy C, O'Connor C, O'Connor DB\*, Kent  
13 E, Malone F, Geary M (Rotunda Hospital, Ireland); McKeivitt KL\*, Lowery AJ\*, Ryan ÉJ, Aherne TM,  
14 Fowler A, Hassanin A, Hogan AM, Collins CG, Finnegan L, Carroll PA, Kerin MJ, Walsh SR (University  
15 Hospital Galway, Ireland); Nally D\*, Peirce C, Coffey JC, Cunningham RM, Tormey S (University Hospital  
16 Limerick, Ireland); Hardy NP\*, Neary PM (University Hospital Waterford/University College Cork, Ireland);  
17 Muallem-Kalmovich L, Kugler N, Lavy R, Zmora O\* (Shamir Medical Center, Israel); Horesh N\* (Sheba  
18 Medical Center, Israel); Vergari R\* (Ospedali Riuniti Di Ancona, Italy); Mochet S\*, Barmasse R, Usai A,  
19 Morelli L (Ospedale Regionale Umberto Parini, Italy); Picciariello A\*, Papagni V, Altomare DF (Azienda  
20 Ospedaliero Universitaria Consorziale Policlinico Di Bari, Italy); Colledan M\*, Zambelli MF, Tornese S,  
21 Camillo A, Rausa E\*, Bianco F, Lucianetti A (Asst-Papa Giovanni Xxiii- Bergamo, Italy); Prucher GM\*,  
22 Baietti AM, Ruggiero F, Maremonti P, Neri F, Ricci S, Biasini M, Zarabini AG (Ospedale  
23 Maggiore/Bellaria Carlo Alberto Pizzardi Ausl Bologna, Italy); Belvedere A, Bernante P, Bertoglio P,  
24 Bousedra S, Brunocilla E, Cipriani R, Cisternino G, De Crescenzo E, De Iaco P, Della Gatta AN, Dondi  
25 G, Frio F, Jovine E, Mineo Bianchi F, Neri J, Parlanti D, Perrone AM, Pezzuto AP, Pignatti M, Pilu G,  
26 Pinto V, Poggioli G, Ravaioli M, Rottoli M\*, Schiavina R, Serenari M, Serra M, Solli P\*, Taffurelli M,  
27 Tanzanu M, Tesei M, Violante T, Zanotti S (Sant'orsola Hospital, Alma Mater Studiorum University of  
28 Bologna, Italy, Italy); Tonini V\*, Sartarelli L, Cervellera M, Gori A (S.Orsola-Malpighi Hospital, Italy);  
29 Armatura G\*, Scotton G, Patauner S, Frena A (St. Moritz Hospital, Italy); Podda M\*, Pisanu A, Esposito  
30 G, Frongia F (Cagliari University Hospital, Italy); Abate E, Laface L, Casati M\*, Schiavo M, Casiraghi T  
31 (Ospedale Vittorio Emanuele III - Carate Brianza, Italy); Sammarco G, Gallo G\*, Vescio G, Fulginiti S,  
32 Scorcia V, Giannaccare G, Carnevali A (University 'Magna Graecia' of Catanzaro, Italy); Giuffrida MC\*,  
33 Marano A, Palagi S, Di Maria Grimaldi S, Testa V, Peluso C, Borghi F, Simonato A, Puppo A, D'Agruma  
34 M, Chiarpenello R, Pellegrino L, Maione F, Cianflocca D, Pruiti Ciarello V, Giraudo G, Gelarda E,  
35 Dalmasso E, Abrate A, Daniele A, Ciriello V, Rosato F, Garnerò A, Leotta L (Santa Croce E Carle  
36 Hospital, Cuneo, Italy); Giacometti M\*, Zonta S (San Biagio Hospital, Domodossola - ASL VCO, Italy);  
37 Lomiento D, Taglietti L, Dester S, Compagnoni B, Viotti F, Cazzaniga R, Del Giudice R (Asst  
38 Valcamonica Ospedale Di Esine, Italy); Mazzotti F\*, Pasini F, Ugolini G (Ospedale per gli Infermi di  
39 Faenza, Italy); Fabbri N, Feo CV\*, Righini E, Gennari S (Azienda Unità Sanitaria Locale di Ferrara,  
40 Università di Ferrara, Italy); Chiozza M, Anania G\*, Urbani A, Koleva Radica M, Carcoforo P\*, Portinari  
41 M, Sibilla M (Azienda Ospedaliero Universitaria Sant'Anna, Italy); Anastasi A, Bartalucci B, Bellacci A,  
42 Canonico G\*, Capezzuoli L, Di Martino C, Ipponi P, Linari C, Montelatici M, Nelli T, Spagni G, Tirloni L,  
43 Vitali A (Ospedale San Giovanni Di Dio, Italy); Agostini C, Alemanno G, Bartolini I, Bergamini C, Brusconi  
44 A, Checcucci C, De Vincenti R, Di Bella A, Fambrini M, Fortuna L, Maltinti G, Muiesan P, Petraglia F,  
45 Prosperi P\*, Ringressi MN, Risaliti M, Sorbi F\*, Taddei A\* (Azienda Ospedaliera Universitaria Careggi,  
46 Italy); Lizzi V\*, Vovola F, Arminio A, Cotoia A, Sarni AL (Ospedali Riuniti Azienda Ospedaliera  
47 Universitaria Foggia, Italy); Familiari P\*, D'Andrea G, Picotti V, Bàmbara F (Fabrizio Spaziani, Italy);  
48 Fontana T\* (Vittorio Emanuele, Italy); Barra F\*, Ferrero S, Gustavino C, Kratochwila C, Ferraiolo A,  
49 Costantini S, Batistotti P, Aprile A, Almondo C, Ball L, Robba C, Scabini S, Pertile D, Massobrio A,  
50 Soriero D (IRCCS Ospedale Policlinico San Martino, Italy); D'Ugo S\*, Depalma N, Spampinato MG ("Vito  
51 Fazzi" Hospital, Italy); Lippa L, Gambacciani C, Santonocito OS\*, Aquila F, Pieri F (Spedali Riuniti Di  
52 Livorno, Italy); Ballabio M\*, Bisagni P, Longhi M, Armao T, Madonini M, Gagliano A, Pizzini P (Ospedale  
53 Maggiore Di Lodi, Italy); Costanzi A\*, Confalonieri M, Monteleone M, Colletti G, Frattaruolo C, Mari G  
54 (San Leopoldo Mandic, Italy); Spinelli A\*, Mercante G, Spriano G, Gaino F, Ferrelli F, De Virgilio A, Rossi  
55 V, Carvello MM, Di Candido F, Kurihara H, Marrano E, Torzilli G, Castoro C, Carrano FM (Humanitas  
56 Clinical and Research Center - IRCCS, Rozzano (MI), Italy); Martinelli F, Macchi A, Fiore M\*, Pasquali S,  
57 Cioffi SPB, Baia M, Abatini C, Sarre C, Mosca A, Biononi D, Gronchi A, Citterio D, Mazzaferro V,  
58 Cadenelli P, Gennaro M, Capizzi V, Guaglio M, Sorrentino L, Bogani G, Sarpietro G, Giannini L, Comini  
59 LV, Rolli L, Folli S, Raspagliesi F, Piazza C, Cosimelli M, Salvioni R (Fondazione IRCCS Istituto  
60 Nazionale dei Tumori, Milano, Italy); Antonelli B, Baldari L, Boni L, Cassinotti E\*, Pignataro L, Rossi G,  
Torretta S, Beltramini GA, Gianni' A (Fondazione IRCCS Ca' Granda - Ospedale Maggiore Policlinico,  
Italy); Tagliabue M, De Berardinis R, Pietrobon G, Chu F, Cenciarelli S, Adamoli L, Ansarin M\*,



1  
2  
3  
4  
5  
6  
7  
8  
9  
10  
11  
12  
13  
14  
15  
16  
17  
18  
19  
20  
21  
22  
23  
24  
25  
26  
27  
28  
29  
30  
31  
32  
33  
34  
35  
36  
37  
38  
39  
40  
41  
42  
43  
44  
45  
46  
47  
48  
49  
50  
51  
52  
53  
54  
55  
56  
57  
58  
59  
60

Fumagalli Romario U\*, Mastrilli F (Istituto Europeo Di Oncologia - IRCCS, Milano, Italy); Mariani NM\*, Nicastro V (Asst Santi Paolo E Carlo, Italy); Cellerino P\* (Ospedale Fatebenefratelli E Oftalmico, Italy); Colombo F\*, Frontali A, Bondurri A, Guerci C, Maffioli A, Ferrario L (Ospedale Luigi Sacco Milano, Italy); Candiani M\*, Bonavina G, Ottolina J, Valsecchi L, Mortini P, Gagliardi F, Piloni M, Medone M, Negri G, Bandiera A, De Nardi P, Sileri P, Carlucci M, Pelaggi D, Rosati R, Vignali A, Parise P, Elmore U (San Raffaele Scientific Institute, Milan, Italy); Tamini N\*, Nespola LC, Rennis M, Pitoni L, Chiappetta MF, Vico E, Fruscio R, Grassi T (Ospedale San Gerardo, Università degli Studi di Milano Bicocca, Italy); Sasia D\*, Migliore M, Gattolin A, Rimonda R, Travaglio E, Olearo E (Regina Montis Regalis Hospital, Mondovì, Italy); Tufo A\*, Marra E, Maida P, Marte G, Tammaro P (Ospedale Del Mare, Italy); Bianco F\*, Incollingo P (Ospedale S. Leonardo - Asl Napoli 3 Sud, Castellammare Di Stabia, Italy); Izzo F, Belli A, Patrone R, Albino V, Leongito M, Granata V, Piccirillo M, Palaia R (Istituto Nazionale Tumori Fondazione, G. Pascale-IRCCS, Naples, Italy); Francone E\*, Gentili S, Nikaj H (Azienda Ospedaliero Universitaria Maggiore Della Carità, Novara, Italy); Fiorini A, Norcini C, Chessa A\* (San Giovanni Di Dio, Italy); Marino MV\*, Mirabella A, Vaccarella G (Azienda Ospedaliera, Ospedali Riuniti Villa Sofia-Cervello, Palermo, Italy); Musini L, Ampollini L\*, Bergonzani M, Varazzani A\*, Bellanti L, Domenichini M, Rossi G, Cabrini E, Fornasari A, Freyrie A\*, Dejana DO, D'Angelo G\*, Bertoli G, Di Lella F, Bocchialini G, Falcioni M, Lanfranco D, Poli T (Azienda Ospedaliero-Universitaria di Parma, Italy); Giuffrida M, Annicchiarico A, Perrone G, Catena F\* (Parma University Hospital, Italy); Raffaele A\* (Policlinico San Matteo, Italy); De Manzoni Garberini A\* (Ospedale Civile Spirito Santo, Italy); Baldini E\*, Conti L, Ribolla M, Capelli P, Isolani SM, Maniscalco P, Cauteruccio M, Ciatti C, Puma Pagliarello C, Gattoni S (Ospedale "Guglielmo Da Saliceto" - Dipartimento di Chirurgia - Piacenza, Italy); Galleano R\*, Malerba M, Ciciliot M (Ospedale Santa Corona, Pietra Ligure (SV), Pietra Ligure, Italy); Farnesi F, Calabrò M\*, Pipitone Federico NS, Lunghi EG, Muratore A (Edoardo Agnelli, Italy); Morelli L\*, Di Franco G, Palmeri M, Tartaglia D\*, Cocolini F, Chiarugi M, Simoncini T\*, Gadducci A, Caretto M, Giannini A, Perutelli A, Domenici L\*, Garibaldi S, Capanna R, Andreani L, Furbetta N, Guadagni S, Bianchini M, Gianardi D (Azienda Ospedaliero Universitaria Pisana, Italy); Pinotti E\*, Montuori M, Carissimi F, Baronio G (Policlinico San Pietro, Italy); Zizzo M\*, Castro Ruiz C, Annessi V, Montella MT, Falco G\*, Mele S, Ferrari G, Mastrofilippo V, Mandato VD\*, Aguzzoli L (Azienda Unità Sanitaria Locale - IRCCS Di Reggio Emilia, Italy); Corbellini C, Baldi C\*, Sampietro GM (Ospedale Di Rho - Asst Rhodense, Italy); Palini GM, Zanini N\*, Garulli G (Ospedale Infermi di Rimini, Rimini, Italy); Barone R\*, Murgese A, Mungo S, Grasso M, Marafante C, Birolo SL, Moggia E, Caccetta M, Masciandaro A, Deirino A, Garino M (Ospedale Degli Infermi Di Rivoli, Italy); Perinotti R, Maiello F (Ospedale degli Infermi, Biella, Italy); Gordini L, Lombardi CP, Marzi F, Marra AA, Ratto C, Di Muro M, Litta F, De Simone V, Cozza V\*, Rosa F, Agnes A, Parello A, Alfieri S, Sganga G (Fondazione Policlinico Universitario Agostino Gemelli IRCCS, Italy); Lapolla P\*, Mingoli A, De Toma G, Fiori E, La Torre F, Sapienza P, Brachini G, Cirillo B, Iannone I, Zambon M, Chiappini A, Meneghini S, Fonsi GB, Cicerchia PM, Bruzzaniti P, Santoro A, Frati A, Marruzzo G, Ribuffo D (Policlinico Umberto I Sapienza University of Rome, Italy); Sagnotta A\*, Marino Cosentino L, Mancini S (Ospedale San Filippo Neri, Italy); Lisi G\*, Spoletini D (Sant'Eugenio Hospital, Italy); Bellato V Campanelli M, Sica G\*, Siragusa L, (Policlinico Tor Vergata Hospital, Rome, Italy); Bonavina L\*, Asti E, Bernardi D, Lovece A (IRCSS Policlinico San Donato, University of Milan, Italy); Perra T, Porcu A\*, Fancellu A, Feo CF, Scanu AM (Cliniche San Pietro, A.O.U. Sassari, Italy); Tuminello F, Galleano R\*, Franceschi A, Langone A (San Paolo, Italy); Fleres F\*, Spolini A, Bordoni P, Franzini M, Clarizia G, Grechi A, Longhini A (Ospedale Di Sondrio (Asst Valtellina E Alto Lario), Italy); Guaitoli E, Manca G (Perrino Hospital Brindisi, Italy); Grossi U, Novello S, Zanus G\*, Romano M, Rossi S (Ca' Foncello Treviso - DISCOG, Università di Padova, Italy); Ferrara F (San Carlo Borromeo Hospital, ASST Santi Paolo e Carlo, Italy); La Torre M (Fabia Mater Hospital, Rome, Italy); Pirozzolo G\*, Recordare A (Dell'Angelo Hospital, ULSS3 Serenissima, Venezia, Italy); Paiella S, Turri G, Rattizzato S, Campagnaro T\*, Guglielmi A, Pedrazzani C, Ruzzenente A, Poletto E, Conci S, Casetti L, Fontana M, Salvia R\*, Malleo G, Esposito A, Landoni L, De Pastena M, Bassi C, Tuveri M, Nobile S, Marchegiani G, Bortolasi L\* (Azienda Ospedaliera Universitaria Integrata Di Verona, Italy); Sambugaro E\*, Malavolta M\*, Moretto G, Impellizzeri H, Inama M\* (Ospedale Pederzoli, Italy); Barugola G, Ascari F, Ruffo G (IRCCS Ospedale Sacro Cuore Don Calabria, Negrar di Valpolicella (Verona), Italy); Granieri S\*, Cotsoglou C (Asst Vimercate, Italy); Berselli M\*, Desio M, Marchionini V, Cocozza E (ASST Settelaghi, Varese, Italy); Di Saverio S\*, Ietto G, Iovino D, Carcano G (University of Insubria, Ospedale di Circolo e Fondazione Macchi (Varese), Varese Lombardy, Italy); Ayasra F\*, Qasem A, Ayasra Y (Al-Basheer Hospital, Jordan); Al-Masri M\*, Abou Chaar MK, Al-Najjar H, Ghandour K, Alawneh F, Abdel Jalil R, Abdel Al S, Elayyan M, Ghanem R, Lataifeh I, Alsaraireh O (King Hussein Cancer Center, Jordan); Abu Za'nouneh FJ, Fahmawee T, Ibrahim A, Obeidat K\* (King Abdullah University Hospital, Jordan); Lee KJ (Keimyung University School of Medicine, Daegu, Korea); Shin SJ, Chung H (Keimyung University, Daegu, Korea); Albader I, Alabbad J, Albader MAS (Mubarak Al-Kabeer Hospital, Jabriya, Kuwait); Bouhuwaish A\*,

1  
2  
3  
4  
5  
6  
7  
8  
9  
10  
11  
12  
13  
14  
15  
16  
17  
18  
19  
20  
21  
22  
23  
24  
25  
26  
27  
28  
29  
30  
31  
32  
33  
34  
35  
36  
37  
38  
39  
40  
41  
42  
43  
44  
45  
46  
47  
48  
49  
50  
51  
52  
53  
54  
55  
56  
57  
58  
59  
60

Taher AS, Omar MSM (Tobruk Medical Center, Libya); Abdulwahed E\*, Biala M, Morgom M (Tripoli Central Hospital, Libya); Elhadi A, Alarabi A, Msherghi A\*, Elhajdawe F, Alsoufi A (Tripoli University Hospital, Libya); Salamah A\*, Salama H, Bulugma M\*, Almabrouk H (Zawia Teaching Hospital, Libya); Venskutonis D\*, Dainius E, Kubiliute E, Bradulskis S, Parseliunas A, Kutkevicius J, Subocius A (Lithuanian University of Health Sciences Kaunas Clinical Hospital, Lithuania); Cheong YJ\*, Masood MS\* (Hospital Raja Permaisuri Bainun, Ipoh, Malaysia); Ngo CW\*, Saravanan R, Abdul Maei N (Hospital Enche' Besar Hajjah Khalsom, Malaysia); Hayati F, Amin Sahid N (Queen Elizabeth Hospital & Universiti Malaysia Sabah, Kota Kinabalu, Sabah, Malaysia); Yanowsky Reyes G, Orozco Perez J, Damian R, Santana Ortiz R, Colunga Tinajero CA (Antiguo Hospital Civil De Guadalajara, Mexico); Cordera F\*, Gómez-Pedraza A, Maffuz-Aziz A, Posada JA, De la Rosa Abaroa MA, Alvarez MR, Arrangoiz R, Hernández R (ABC Medical Center, Mexico); Bozada Gutierrez K, Trejo-Avila M\*, Valenzuela-Salazar C, Herrera-Esquivel J, Moreno-Portillo M (Hospital General Dr. Manuel Gea González, Mexico); Pinto-Angulo VM\*, Sosa-Duran EE, Ziad-Aboharp H, Jimenez Villanueva X (Hospital Juárez de México, Ciudad de México, Mexico); Soulé Martínez CE\*, Lupián-Angulo AI (Hospital Central Norte Pemex, Mexico); Martínez Zarate J Jacobo\*, Reyes Rodriguez E, Montalvo Dominguez G (Hospital Médica Sur, Ciudad de México, Mexico); Becerra García FC\* (Hospital San Ángel Inn Chapultepec, Mexico); Melchor-Ruan J, Vilar-Compte D\*, Romero-Bañuelos E, Herrera-Gomez A, Meneses-Garcia A, Isla-Ortiz D, Salcedo-Hernández RA, Hernández-Nava JM, Morales-Castelan JE (Instituto Nacional De Cancerologia, Mexico); Sarre C, Posadas-Trujillo OE, Buerba GA, Alfaro-Goldaracena A, Pena Gomez-Portugal E, Lopez-Pena G; Hinojosa CA\*, Mercado MA\* (Universidad Nacional Autonoma de Mexico, Instituto Nacional de Ciencias Medicas y Nutricion Salvador Zubiran, Mexico City, Mexico); Ramos-De la Medina A\*, Martinez L, Duran I, Gonzalez DS, Martinez MJ, Nayen Sainz de la Fuente A (Hospital Español Veracruz, Mexico); Miguelena L, Hernández Miguelena L (Hospital Regional Veracruz, Mexico); Louraoui SM\*, El Azhari A, Rghioui M (Cheikh Khalifa International University Hospital, Morocco); Khya E (Moulay Youssef, Morocco); Ghannam A\*, Souadka A\*, El Ahmadi B, Belkhadir ZH, Majbar MA, Benkabbou A, Mohsine R (Institut National D'oncologie, Morocco); Oudrhiri MY\*, Bechri H, Arkha Y, El Ouahabi A (Centre Hospitalier Universitaire Ibn Sina Rabat, Morocco); Frima H\*, Bachiri S, Groen LC (Noordwest Ziekenhuisgroep, Alkmaar, Netherlands); Verhagen T\*, ter Brugge FM (Ziekenhuisgroep Twente, Almelo, Netherlands); Scheijmans JCG, Boormeester MA\*, Hompes R\*, Meima-van Praag EM, Sharabiany S (Amsterdam UMC, University of Amsterdam, Netherlands); Borgstein ABJ, Gisbertz SS\*, van Berge Henegouwen MI\* (Amsterdam UMC VUMV, Netherlands); Gans S\*, Van Duijvendijk P, Herklots T, De Hoop T, De Graaff MR, Sloothaak D, Bolster-van Eenennaam M, Baaij J, Klinkenbijn JHG (Gelre ziekenhuis, Apeldoorn, Netherlands); Van Eekeren R, Spillenaar Bilgen EJ (Rijnstate, Arnhem, Netherlands); Van der Burg SW, Harlaar NJ\*, Jonker FHW (Rode Kruis Ziekenhuis, Beverwijk, Netherlands); Vermaas M, Voigt KR (Ijsselland Ziekenhuis, Capelle aan den IJssel, Netherlands); Nellensteijn D\*, Bensi EAB, (Curacao Medical Center, Willemstad, Curaçao, Curaçao, Netherlands); Posma-Bouman L\* (Slingeland Ziekenhuis, Netherlands); Van Sambeek M\*, Holscher M (Catharina Ziekenhuis, Eindhoven, Netherlands); Van den den Broek WT (St. Anna Ziekenhuis, Geldrop, Netherlands); HKruijff S\*, De Vries JPPM, Steinkamp PJ, Jonker PKC, Van der Plas WY, Bierman W, Janssen Y (University Medical Center Groningen, Netherlands); Franken J, Oosterling S\* (Sparne Gasthuis, Netherlands); Boerma EG\*, Schweitzer D, Keulen MHF, Ketting S (Zuyderland MC, Sittard/Heerlen, Netherlands); Wegdam JA, Vries Reilingh TS de, Schipper E, Teeuwen PHE (Elkerliek Ziekenhuis, Helmond, Netherlands); Hendriks ER, Van Geloven AAW (Tergooi Hospital, Hilversum, Netherlands); Emous M\*, Poelstra R, Teunissen M (Medisch Centrum Leeuwarden, Leeuwarden, Netherlands); Gerritsen SL, Boerma D, (st. Antonius Ziekenhuis, Nieuwegein, Netherlands); De Reuver PR\*, Thunnissen F, Vermeulen BAM, Groen A, (Radboud Universitair Medisch Centrum, Nijmegen, Netherlands); Van Ginhoven TM\*, Viëtor CL, van der Oest MJW (Erasmus Medisch Centrum, Rotterdam, Netherlands); Vriens PWHE\*, Houwen T, J Heisterkamp (Elisabeth TweeSteden Ziekenhuis, Tilburg, Netherlands); van Petersen AS, van der Meij W, Stevens CT (Bernhoven, Uden, Netherlands); Pronk A, Bakker WJ (Diaconessenhuis, Utrecht, Netherlands); Richir MC\*, Vriens MR, Filipe MD, (University Medical Center Utrecht, Utrecht, Netherlands); Uittenbogaart M, Leclercq WKG\*, Sijmons JML, Vancoillie PJ (Maxima Medical Center, Netherlands); Konsten J\*, Van Heinsbergen M (VieCuri Medisch Centrum, Netherlands); Dekker NAM, den Boer FC (Zaans Medisch Centrum, Zaandam, Netherlands); Akinmade A\*, Adeyeye A, Enoch E, Fayose S (Afe Babalola University Multi-System Hospital, Nigeria); Okunlola AI\*, Adeniyi AA, Adeyemo OT, Adebara IO, Bakare A, Babalola OF, Abiyere OH, Banjo OO (Federal Teaching Hospital, Ido Ekiti, Nigeria); Olori S\*, Akaba OG, Agida ET, Abdullahi IH (University of Abuja Teaching Hospital, Nigeria); Egbuchulem IK, Olulana D, Lawal TA\*, Ogundoyin O, Oyelakin OA\*, Nwaorgu OG, Sule SO (University College Hospital, Nigeria); Makwe CC, Afolabi BB, Seyi-Olajide JO\*, Ademuyiwa AO, Bode CO, Atoyebi O, Elebute OA, Okunowo AA (Lagos University Teaching Hospital, Nigeria); Williams OM\*, Eke NG, Oshodi OA, Faboya OM, Adeniran AS, Omisanjo OA, Oshodi YA,



1  
2  
3 Ogunyemi AA, Atobatele KM (Lagos State University Teaching Hospital, Nigeria); Adeyeye A, Aremu I,  
4 Olasehinde O, Abdur-Rahman L\*, Bello J, Popoola A, Sayomi TO, Raji HO, Adeleke N, Lawal B, Habeeb  
5 O, Agodirin O (University of Ilorin Teaching Hospital, Nigeria); Tolani MA\*, Sholadoye TT\*, Nwabuoku  
6 SE, Abubakar M (Ahmadu Bello University Teaching Hospital, Nigeria); Risteski T\*, Cvetanovska  
7 Naunova V, Jovcheski L, Lazova E (University Clinic for Pediatric Surgery, North Macedonia); Agledahl I\*  
8 (Hammerfest Hospital, Norway); Breuer RG\* (Soerlandet Hospital Kristiansand, Kristiansand, Norway);  
9 Massoud J\* (Khoula Hospital, Oman); Waqar SH\*, Rashid I, Ayubi A (Pakistan Institute of Medical  
10 Sciences, Pakistan); Bhatti ABH\* (Shifa International Hospital, Pakistan); Younis MU (Jinnah post  
11 graduate medical center, Karachi, Pakistan); Ghouri A, Ayub B, Sayyed RH\* (Patel Hospital, Pakistan);  
12 Saleem A, Turk K\*, Alvi A, Abassy J\*, Khan S, Arshad M, Ahmed K, Siddiqui T, Pirzada A (Aga Khan  
13 University, Pakistan); Kerawala AA\*, Jamal A (Cancer Foundation Hospital, Pakistan); Rai L\*, Nafees  
14 Ahmed R, Memon AS\* (Dr Ruth K.m. Pfau Civil Hospital, Pakistan); Qureshi AU\*, Ayyaz M\*, Umar M,  
15 Butt U\*, Kashif M, Khan WH\*, Waris Farooka M\*, Wasim T\* (Services Hospital Lahore, Pakistan); Talat  
16 N, Tahir W, Naseem J (The Children's Hospital & The Institute of Child Health Lahore, Lahore, Pakistan);  
17 Akbar A\*, Afroze S, Ali L, Sultan A, Ali HB (Doctors Hospital, Pakistan); Janjua MH\*, Janjua A, Asghar S,  
18 Farooq MS, Sarwar MZ, Naqī SA, Gondal KM (King Edward Medical University, Mayo Hospital, Lahore,  
19 Pakistan); Bukhari SI\* (Lady Reading Hospital, Pakistan); Tariq M (North West General Hospital and  
20 Research Centre, Pakistan); Javed S\*, Yaqoob E, Ashraf M, Mahmood U, Raja Shabbir K (Holy Family  
21 Hospital, Pakistan); Abukhalaf SA, Amro A (Palestine Medical Complex, Palestine); Cabada Lee JM  
22 (Complejo Hospitalario Caja Seguro Social, Panama); Aguilar A (Hospital De Especialidades Pediatricas  
23 Css, Panama); Rodriguez E (Hospital Santo Tomas, Panama); Castillo K (Hospital Irma De Lourdes  
24 Tzanetatos CSS, Panama); Cukier M\*, Rodriguez-Zentner H, Arrue E (Pacifica Salud Hospital, Panama);  
25 Isaacs Beron R (Hospital Regional Rafael Hernandez Cms, Panama); Rodríguez Gonzalez A (Hospital de  
26 Clínicas, II Cátedra de Clínica Quirúrgica, Universidad Nacional de Asunción, Asuncion, Paraguay);  
27 Panduro-Correa V\*, Cornelio DK (Hospital Hermilio Valdizan Medrano, Peru); Otiniano Alvarado CE\*,  
28 Caballero Sarabia VD (Arzobispo Loayza National Hospital, Peru); Vasquez-Ojeda XP, Lizzetti-Mendoza  
29 G, Niquen-Jimenez M, Shu-Yip SB, León Palacios JL, Borda-Luque G\* (Cayetano Heredia National  
30 Hospital, Peru); Zegarra SA\*, Huamán Egoávil E, Suazo Carmelo C (Guillermo Almenara National  
31 Hospital, Peru); Castro de la Mata R\*, Rivas D, Targarona J (Clínica Delgado Auna, Peru); Trujillo Y\*,  
32 Olivera Villanueva M (Hospital Nacional Daniel Alcides Carrión, Peru); Lahoud-Velaochaga A\*, Cabillas  
33 K, Castañeda W, Colina Casas J (Hospital Nacional Sergio E. Bernales, Lima, Peru); Betalleluz Pallardel  
34 J\*, Camacho Zacarías F, Vélez Segura E, Cruz Condori DL (Hospital De Emergencias Jose Casimiro  
35 Ulloa, Peru); Huamán E\* (Hospital Guillermo Kaelin de la Fuente, Lima, Peru); Ugarte Oscco R, Vergel  
36 Cabrera C, Huamán Egoávil E (Hospital Emergencia Ate Vitarte, Lima, Peru); Carpio Colmenares YT\*,  
37 García Barrionuevo LA, Cárdenas Ruiz de Castilla D, Mansilla Doria P, Li Valencia MR (Clínica El Golf -  
38 Sanna, Peru); Salazar A, Sarmiento A, Díaz C, Morales E, Ore E, Zegarra H, Siccha J, Guardia M,  
39 Sandoval M, Mendiola GC\*, Mimbela M (Hospital Santa Rosa De Lima, Peru); Diaz-Ruiz R\*, Zeta LA,  
40 Cordova-Calle E, (Hospital Regional de Piura, Jose Cayetano Heredia , Peru); Nuñez HM (Hospital II-2  
41 Tarapoto, Tarapoto, Peru); Ortiz-Argomedo MR\* (Hospital Belén de Trujillo, Trujillo, La Libertad, Peru);  
42 Caballero-Alvarado J, Salazar-Tantaleán A, Espinoza-Llerena R (Hospital Regional Docente de Trujillo,  
43 Trujillo, Peru); Aliaga-Ramos M\* (Hospital Alberto Hurtado Abadia, La Oroya - Yauli, Peru); Asodisen O\*,  
44 Jabagat E, Tedoy CM (Cebu City Medical Center, Cebu City, Philippines); Ramos RA, Lopez MPJ\*,  
45 Violago KLE, Aram R (Ospital Ng Makati, Philippines); Carlos Santos P, Filarca RF\* Carlos A\*, Santos P,  
46 Filarca RL\* (Medical Center Manila-ManilaMed, Manila, Philippines); Domingo EJ, Khu KJO, Lapitan MC,  
47 Sacdalan MDP\*, Kho MJN, Baticulon RE, Bravo SLR (Philippine General Hospital, University of The  
48 Philippines Manila, Philippines); Cueto, MAC\*, Ramos, CL\*, Fuentes, JR (José R. Reyes Memorial  
49 Medical Center, Manila, Philippines); Sadian H, Gumarao A, Barraquio A, Cruz EM, Gonzales AD (Pasig  
50 City General Hospital, Philippines); Reyes JAS\*, Salud JA, Tancinco EG, Rivera RD, Lim JA (The  
51 Medical City, Philippines); Barcelon JC\*, Chiu JA, Carballo MI (Cardinal Santos Medical Center,  
52 Philippines); Major P\*, Gawron I\*, Jach R\* (Jagiellonian University Medical College, Poland); Borges F\*,  
53 Matos Costa P, Henriques S, Rodrigues SC (Hospital Garcia de Orta, Portugal); Gonçalves N\* (Hospital  
54 De Braga, Portugal); Curvas JM (Hospital de Bragança, Bragança, Portugal); Cabeleira A, Branco C,  
55 Serralheiro P\*, Alves R, Teles T (Hospital De Cascais - Dr. José De Almeida, Portugal); Lázaro A\*,  
56 Canhoto C, Simões J, Costa M, Almeida AC, Nogueira O, Oliveira A, Athayde Nemésio R, Silva M,  
57 Lopes C, Amaral MJ, Valente da Costa A, Andrade R, Martins R, Guimaraes A, Guerreiro P, Ruivo A,  
58 Camacho C, Duque M, Santos E, Breda D, Oliveira JM, De Oliveira Lopez AL, Garrido S, Colino M, De  
59 Barros J, Correia S, Rodrigues M (Centro Hospitalar E Universitário De Coimbra, Portugal); Cardoso P\*,  
60 Martins R, Teixeira J, Soares AP, Morais H\*, Pereira R, Revez T, Manso MI, Domingues JC, Henriques  
P, Ribeiro R, Ribeiro VI, Cardoso N, Sousa S, Martins dos Santos G (Centro Hospitalar Universitário do  
Algarve - Unidade De Faro, Portugal); Carvalho L, Osório C, Antunes J, Lourenço S, Balau P, Godinho

1  
2  
3 M, Pereira A (Centro Hospitalar Entre o Douro e Vouga, Santa Maria da Feira, Portugal); Silva N\*, Kam  
4 da Silva Andrade A, Pereira Rodrigues A, Borges N\*, Correia J, Vieira I, Ribeiro T, Catarino J, Correia R,  
5 Pais F, Carreira Garcia R, Bento R, Cardoso J, Luis M, Santos E, Henriques J, Patena Forte J, Maciel J,  
6 Pinheiro Santos J, Silva M, Silva TP, Branquinho A (Centro Hospitalar Universitário Lisboa Central,  
7 Portugal); Caiado A\* (Instituto Português De Oncologia De Lisboa Francisco Gentil, Portugal); Miranda  
8 P, Garrido R\*, Peralta Ferreira M, Ascensão J, Costeira B, Cunha C, Rio Rodrigues L, Sousa Fernandes  
9 M, Azevedo P, Ribeiro J, Lourenço I, Gomes H, Mendinhos G\*, Nobre Pinto A (Hospital Beatriz Angelo,  
10 Portugal); Ribeiro A, Gil CG, Lima-da-Silva C, Pereira C, Tavares F, Ferraz I, Almeida JI, Marialva J,  
11 Lopes L, Costa MJMA, Nunes-Coelho M, Teixeira MJ, Machado N, Alfonso JP, Saraiva P, Silva RL,  
12 Santos R, Almeida-Reis R\*, Correia-de-Sá T, Fernandes V, Almeida-Pinto J, Gonçalves JP (Centro  
13 Hospitalar do Tâmega e Sousa, Portugal); Santos-Sousa H\*, Cavaleiro S, Leite-Moreira AM, Pereira A,  
14 Pereira-Neves A, Faria CS, Monteiro JM, Nogueiro J, Sampaio-Alves M, Magalhães Maia M, Vieira P,  
15 Pina-Vaz T, Jácome F, Devezas V, Almeida A, Silveira H, Vaz S, Castanheira Rodrigues S (Centro  
16 Hospitalar E Universitário De São João, Portugal); Costa Santos D, Grilo JV, Abreu da Silva A\*, Claro M,  
17 Deus AC (Hospital Do Litoral Alentejano, Portugal); Branquinho R\* (Centro Hospitalar Medio Tejo,  
18 Portugal); Santos PMDD\*, Patrício B, Vieira Paiva Lopes AC (Hospital De Torres Vedras - Centro  
19 Hospitalar Do Oeste, Portugal); Mendes JM, Carvalho MF, Oliveira CM\* (Centro Hospitalar do Médio  
20 Ave, Portugal); Tojal A\*, Pinto J (Centro Hospitalar Tondela-Viseu, Portugal); Abutaka A, Zarour A\*,  
21 Abdelkareem M, Ali SM, Al Tarakji M, Alfkey R, Mukhtar K, Wani IR, Singh R, Ahmed K, Bouchiba N,  
22 Mahdi H, Abdelaziem Mustafa S, Al Ansari A (Hamad General Hospital, Qatar); Drasovean R, Caziuc A  
23 (Clinica Chirurgie I, Spitalul Clinic Judetean de Urgenta, Cluj-Napoca, Romania); Galliamov E, Agapov  
24 M\*, Kakotkin V, Semina E, Kubyshkin V, Kamalov A (Moscow Research and Educational Center,  
25 Lomonosov Moscow State University, Russian Federation); Efetov SK, Kochetkov VS, Garmanova T,  
26 Tsarkov P\*, Tulina I, Rodimov S, Markaryan D, Kazachenko E (Clinic of Coloproctology and Minimally  
27 Invasive Surgery, Sechenov Medical State University, Moscow, Russian Federation); Yanishev A\*,  
28 Abelevich A, Bazaev A, Kokobelyan A, Zarubenko P (Privolzhsky Research Medical University, Nizhny  
29 Novgorod Regional Clinical Hospital, Russian Federation); Zakharenko A\*, Novikova A (Pavlov First  
30 State Medical University of St. Petersburg, Russian Federation); Kim G\*, Shmatov D, Stoliarov M,  
31 Kamenskikh M (Saint Petersburg State University Hospital, Saint Petersburg, Russian Federation);  
32 Nambi G (University Hospital, Saudi Arabia); Almulhim AS, Madkhali T, Alzouhir A, Alissa A (King Fahad  
33 Hospital Hofuf, Saudi Arabia); Alameer E\*, Badedi M, Alnami AQ, Darraj H (Jazan University - King Fahd  
34 Central Hospital - Sabia General Hospital - Baish General Hospital, Saudi Arabia); Alkhuzai A\*,  
35 Khadwardi F, Abualjadayel M, Tashkandi W (King Abdulaziz Hospital and Oncology Center, Saudi  
36 Arabia); Farsi A, Malibary N\*, Trabulsi N, Farsi S (King Abdulaziz University Hospital, Saudi Arabia); Said  
37 bayazeed A\*, Nasser M\*, Siddiqui MS\*, Al Awwad S\* (King Fahad General Hospital, Saudi Arabia);  
38 Alshahrani M, Alsharif F, Fahmi MW (Aseer Central Hospital, Saudi Arabia); Gudal A\*, Alasmari A,  
39 Alqahtani S (King Abdullah Medical Complex - Jeddah, Saudi Arabia); Majrashi S\*, Mashat A, Al  
40 Raddadi R (East Jeddah General Hospital, Saudi Arabia); Alharbi A\*, Nasser Y, Hamayel H, Alhojaili A,  
41 Aljohani R (King Fahad General Hospital, Saudi Arabia); Sogair O\* (Ohud Hospital, Saudi Arabia);  
42 Alfadhan O, Alzahrani A, Alzomaili B\*, Tashkandi W (Hera General Hospital, Saudi Arabia); A Azab M\*  
43 (King Abdullah Medical City Makkah, Saudi Arabia); Alotaibi M\*, Maashi A, Zowgar A, Alsakkaf M (King  
44 Faisal Hospital, Saudi Arabia); Alnema M\*, Khayat S, Felmban S, Almhmadi A (Alnoor Specialist  
45 Hospital, Saudi Arabia); Alqannas M, Cortés Guiral D, Alyami M\*, Elawad A (King Khalid Hospital,  
46 Najran, Saudi Arabia); Alhefdhi A\*, Alresaini F, Kurdi W, Tulbah M, Aldakheel M, Alsahan N, Koussayer  
47 S, Elsheikh H, Al-qattan M, Alshanafe S, Rafique A, Mahabbat N, Saeed B (King Faisal Specialist  
48 Hospital, Saudi Arabia); Al-Kharashi E\*, Alsowaina K, Arab N, Aljaber F, Al Hasan I, Alghamdi A,  
49 Badahdah F, Alghuliga A, Abdulfattah F, Alanazi F, Albaqami F, Alsuhaybani A (Prince Sultan Military  
50 Medical City, Saudi Arabia); AlFakhri A\*, Alqasem S, Alajaji N (King Fahad Medical City, Saudi Arabia);  
51 Noh T\*, Bin Nasser A, Alowais J, Alburakan A, Alamri O, Albdah A, Alawi K, Alshalhoub M (King Saud  
52 University, Saudi Arabia); ElSanhoury K\*, Almoferreh A, Ibrahim S, Elshafie H, Osman I, Guzman T,  
53 Mutair H, Siddiqui A, Chowdhury S\*, Alghamdi R, Almutrafi S, Alfaifi J, D'Souza J, Alshitiw A, Alkreedees  
54 N, Alramadhan M, Alshehri M (King Saud Medical City, Saudi Arabia); Alzahrani A\*, Alobaysi S, Badr H,  
55 Alshahrani A (Security Forces Hospital, Saudi Arabia); Alshehri A\*, Alrashed M, Altahan T, Alsabahi T,  
56 Alhossaini R, Sbaih M (Prince Mohammed Bin Abdulaziz Hospital, Saudi Arabia); Alalawi Y, Alnwiij K, Al  
57 Ayed A (King Salman Armed Forces Hospital, Tabouk, Saudi Arabia); Ghedan S, Alharthi R, Awad S\*, I  
58 Sharara M, Abdelrhman S, Althobaiti W (King Faisal Medical Complex, Saudi Arabia); Srbinovic L,  
59 Perovic M, Mikovic Z, Nikolic B, Vasiljevic M, Pazin V, Mandic Markovic V, Dimitrijevic D, Zecevic N  
(Clinic for Gynecology and Obstetrics Narodni Front, Serbia); Gregoric P\*, Micic D, Loncar Z, Doklestic  
60 K, Ivancevic N (Clinic for Emergency Surgery, Emergency Center, Clinical Center of Serbia, Serbia);  
Djukic V\*, Stojakov D, Ilic R, Savic P, Pijanovic N, Milanovic M, Radosavljevic M, Dejanovic T, Kostic M,

1  
2  
3 Paskas J, Bojic S, Stevanovic P, Djuric M (KBC Dr Dragisa Misovic-Dedinje, Serbia); Kadija M\*, Tulic G,  
4 Glisovic Jovanovic I (Clinic for Orthopaedic Surgery and Traumatology, Clinical Center of Serbia,  
5 Belgrade, Serbia); Lieske B\* (National University Hospital, Singapore, Singapore); Kayombo E, Kruger I,  
6 De Kock M, Malan A, Ferreira C, Du Preez H, Mulder W, Noel C\*, Le Grange S, Lusawana O  
7 (Universitas Academic Hospital Complex, South Africa); Kies C, Steyn E, Janson J, Buitendag JJP, Chu  
8 K\*, Mihalik M, Nel R, Naidoo S (Tygerberg Hospital, South Africa); Kloppers C\*, Nel D, Jonas E, Pickard  
9 H, Bernon M, Almglá N\*, Rayamajhi S, Mugla W\* (Groote Schuur Hospital, South Africa); Carapinha C  
10 (Netcare Clinton Hospital, Johannesburg, South Africa); Hyman GY, Fourtounas M, Moore R\* (Chris  
11 Hani Baragwanath Academic Hospital, South Africa); Sánchez Mozo A (Complejo Hospitalario  
12 Universitario De Albacete, Spain); Aguado Lopez H\* (Hellin Hospital, Spain); Zárata Pinedo A (Hospital  
13 Germans Trias i Pujol, Badalona, Spain); Jimenez Toscano M\*, Alonso de la Fuente N, Mancebo G,  
14 Cecchini L, Munarriz M, Cazador Labat M, López Campillo A, Martorell P, Espinosa CA (Hospital Del  
15 Mar, Spain); Caja Vivancos P\*, Villalabeitia Ateca I\*, Prieto Calvo M, Marín H, Martín Playa P\*, Gainza A,  
16 Aragon Achig EJ, Rodríguez Fraga A, Melchor Corcóstequi I, Mallabiabarrena Ormaechea G\*, García  
17 Gutierrez JJ, Barbier L, Pesántez Peralta MA\*, Jiménez Jiménez M, Municio Martín JA, Gómez Suárez  
18 J, García Operé G, Pascua Gómez LA, Oñate Aguirre M (Hospital Universitario Cruces, Spain);  
19 Fernandez-Colorado A, De la Rosa-Estadella M\*, Gasulla-Rodríguez A, Serrano-Martín M, Peig-Font A,  
20 Junca-Martí S, Juárez-Pomes M, Garrido-Ondono S, Blasco-Torres L, Molina-Corbacho M, Maldonado-  
21 Sotoca Y, Gasset-Teixidor A, Blasco-Moreu J (Corporació Sanitària Parc Taulí, Spain); Gomez  
22 Fernandez L\*, Cayetano Paniagua L (Consorti Sanitari De Terrassa, Spain); Izquierdo O, Ventura D,  
23 Castellanos J (Parc Sanitari Sant Joan de Déu, Sant Boi de Llobregat, Barcelona, Spain); Ballester  
24 Vazquez E, Sanchez Lopez A\*, Balague Ponz C, Targarona Soler EM, Sanchez Cabús S, Molina Santos  
25 V, Gonzalez Lopez JA, Medrano Caviedes R, Moral Duarte A (Hospital De La Santa Creu I Sant Pau,  
26 Spain); Espin-Basany E\*, Pellino G, Blanco-Colino R (Vall D'hebron University Hospital, Spain); Turrado-  
27 Rodriguez V\*, Lacy AM, de Lacy FB, Morales X, Carreras-Castañer A\*, Torner P, Jornet-Gibert M,  
28 Balaguer-Castro M, Renau-Cerrillo M, Camacho-Carrasco P, Vives-Barquiel M, Campuzano-Bitterling B,  
29 Gracia I, Pujol-Muncunill R (Hospital Clínic de Barcelona, Spain); Martín-Sole O\*, Rubio-Palau J, Tarrado  
30 X, Garcia-Aparicio L, De Haro Jorge I, Martín A, Rojas-Ticona J, Perez-Bertolez S, Cuesta Argos M,  
31 Capdevila Vilario B, Coronas Soucheiron M, Riba Martínez M, Saura Garcia L, Prat Ortells J, Bejarano  
32 Serrano M, Parri P, Massaguer C, Vicario F, Palazon Bellver P, Moraleta Gudayol I (Hospital Sant Joan  
33 de Deu de Barcelona, Spain); Lara A, Escobar D, Arrieta M, Garcia de cortazar U\*, Villamor Garcia I  
34 (Hospital Universitario De Basurto, Spain); Landaluze-olavarria A\*, Gonzalez De miguel M, Fernández  
35 Gómez Cruzado L, Begoña E, Lecumberri D (Hospital Urduliz, Spain); Acosta Mérida MA\*, Yepes Cano  
36 AF\* (Hospital Universitario De Gran Canaria Doctor Negrín, Spain); Estaire Gómez M\*, Padilla-Valverde  
37 D\*, Sánchez-García S, Sanchez-Pelaez D, Jimenez Higuera E, Picón Rodríguez R, Fernández  
38 Camuñas À, Martínez-Pinedo C, Garcia Santos EP, Muñoz-Atienza V, Moreno Pérez A, López de la  
39 Manzanara Cano CA (Hospital General Universitario De Ciudad Real, Spain); Ugarte-Sierra B\*, Ibáñez-  
40 Aguirre FJ, De Andres Olabarria U, Fernández Pablos FJ, Durán Ballesteros M, Sanz Larrainzar A  
41 (Hospital Universitario De Galdakao, Spain); Jiménez Carneros V\*, Valle Rubio A, Alonso-Lamberti L,  
42 Salazar A, García-Quijada J, Leon R, Rodríguez JL, Jimenez Miramón J, Jover JM, Martín Salamanca  
43 MB\*, Assaf M, Pérez Simón V, Landeo Agüero SA, Baeza Pintado N, Huertas Fernandez MA, Carabias  
44 A (Getafe University Hospital, Spain); Sosa MV\*, Lora-Cumplido P, Lanuza L (Hospital de Cabueñes,  
45 Spain); Galipienso Eri M, Garcia Montesino JD, Dellonder Frigolé J, Noriego Muñoz D\* (Hospital  
46 Universitari De Girona Dr. Josep Trueta, Spain); Navarro-Sánchez A\* (Complejo Hospitalario  
47 Universitario Insular-Materno Infantil de Gran Canaria, Spain); Enjuto D\*, Perez Gonzalez M, Díaz Peña  
48 P, Gonzalez J, Marqueta De Salas M, Martinez Pascual P, Rodríguez Gómez L, Garcés García R,  
49 Ramos Bonilla A, Herrera-Merino N, Fernández Bernabé P, Cagigal Ortega EP, Hernández I, García de  
50 Castro Rubio E, Cervera I (Severo Ochoa University Hospital, Spain); Sánchez-Guillén L, Fernández-  
51 Candela A, Curtis-Martínez C, Soler-Silva Á, Oller Á, Triguero-Cánovas D, Bosch-Ramírez M, Lillo C,  
52 Lario S, Arroyo A (Universidad Miguel Hernández, Elche, Alicante, Spain); Espino Segura-Illa M,  
53 Sánchez Aniceto G\*, Castaño-Leon AM\*, Jimenez-Roldan L, Delgado Fernandez J, Pérez Núñez A,  
54 Lagares A, Garcia Perez D, Santas M, Paredes I, Esteban Sinovas O, Moreno-Gomez L, Rubio E\*, Vega  
55 V, Vivas Lopez A, Labalde Martinez M, García Villar O, Pelaéz Torres PM, Garcia - Borda J, Ferrero  
56 Herrero E, Gomez P, Eiriz Fernandez C, Ojeda-Thies C\*, Pardo Garcia JM (12 De Octubre University  
57 Hospital, Spain); Di Martino M\*, De la Hoz Rodriguez A, García Septiem J, Maqueda González R,  
58 Delgado Búrdalo L, Correa Bonito A, Martín-Perez E (Hospital Universitario De La Princesa, Spain);  
59 García Villayzán JE\*, Albi Martín B (Fundación Jimenez Díaz University Hospital, Spain); Lozano  
60 Lominchar P, Martín L, Fernández M, Rey-Valcarcel C\*, Tousidonis M, Martín-Albo Caballero L, Lowy A,  
Alonso Ortuño P, Ayuso Herrera E, Caño Velasco J, Aragon-Chamizo J, Perez Diaz MD, Mateo-Sierra  
O, Quintana-Villamandos B, Barrio JM, Fanjul M, Sanchez- Perez C, Fernandez ML, Hernandez-



1  
2  
3 Kakauridze S, Rio J (Hospital General Universitario Gregorio Marañón, Spain); Díaz Pérez D, Serrano  
4 González J\*, Colao García L, Gutierrez Samaniego M, Hernandez Bartolome MA, Galindo Jara P,  
5 Esteban Agustí E (Hospital Universitario De Torrejón De Ardoz, Spain); Ripollés-Melchor J\*, Abad-Motos  
6 A, Abad-Gurumeta A, Martínez-Hurtado E, Ruiz-Escobar A (Infanta Leonor University Hospital, Spain);  
7 Brogly N, Guasch E, Hernandez Gutierrez A, Bartha Rasero JL, Perez Y, Garcia-Pineda V, Gracia M,  
8 Siegrist Ridruejo J, Diestro MD, Sanchez-Mendez JI, Marti C, Melendez M, Moreno-Palacios E, Loayza  
9 A, Frias L, Zapardiel I\*, Rubio-Perez I\*, Prieto Nieto MI, Guevara J, Gegundez Simon A, GortazarS,  
10 Chavarrias N, Alvarez E, Saavedra J, Ramos-Martin P, Urbietta A, Gomez Rivas J, Toribio-Vázquez C,  
11 Yebes A (Hospital Universitario La Paz, Spain); Hernández-García M, Losada M\*, Diéguez B, García-  
12 Conde M, Alonso Poza A (Hospital Universitario Del Sureste, Spain); Marquez L\*, Becerra R, Martin M,  
13 Jorgensen T (Hospital Central De La Cruz Roja San Jose Y Santa Adela, Spain); Mugerza JM\*,  
14 Dziakova J, Sánchez del Pueblo C, Saez Carlin P, Camarero E, Picazo S, Pizarro MJ, Avellana R,  
15 Catalán V, Lopez Antoñanzas L, Cano O, Anula R, Sanz Lopez R, Sanz Ortega G, Garcia Alonso M,  
16 Torres AJ, Martin Antona E, Garcia Botella S (Hospital Clínico San Carlos De Madrid, Spain); Ramos D\*,  
17 Barranquero AG, Ocaña J, Núñez J, Cerro Zaballos C (Hospital Universitario Ramón Y Cajal, Spain);  
18 Crego-Vita D\*, Huecas-Martínez M (Hospital Central De La Defensa Gomez Ulla, Madrid, Spain); Diez  
19 Alonso M\*, Mendoza-Moreno F, Vera Mansilla C, Ovejero Merino E, Hernandez P, Blazquez Martin A,  
20 Ruiz Grande F, Morales Palacios N\*, Garcia-Loarte Gomez E, Garca Rico E (Hospital Universitario  
21 Principe De Asturias, Spain); Minaya-Bravo AM\*, San Miguel Méndez C, Galvan Pérez A, Gonzalez-  
22 Gonzalez E, Robin Valle de Lersundi A, Calcerrada Alises E, García-Ureña MA, Cruz Cidoncha A  
23 (Hospital Del Henares. Universidad Francisco de Vitoria. , Spain); Troncoso Pereira P\*, Alcaide Matas F,  
24 García Pérez JM (Hospital Mateu Orfila, Spain); Muñoz Vives JM, Osorio A, Gómez Díaz CJ, Guariglia  
25 CA, Soto Montesinos C\*, Sanchon L, Xicola Martínez M, Guàrdia N, Collera P, Diaz Del Gobbo R,  
26 Sanchez Jimenez R, Farre Font R, Flores Clotet R (Fundació Althaia - Xarxa Assistencial Universitària  
27 de Manresa, Spain); Calvo Espino P\*, Guillamot Ruano P (Hospital Universitario De Móstoles, Spain);  
28 Rey-Biel J\*, Pingarrón-Martin L, Ruiz Martin I and Moliner Sanchez C (Rey Juan Carlos University  
29 Hospital, Spain); Carrasco-Prats M\*, Giménez-Francés C, Ruiz-Marín M, Fernández-López AJ, García-  
30 Escudero D, García-Porcel V, Lax-Pérez R, Sánchez-Robles M, Valero-Soriano M, Medina-Manuel E,  
31 García-Soria V, Gurrea-Almela E, Marco-Garrido A, Martínez-Alonso JA, González-Valverde FM,  
32 Fernández-Fernández PV, Sánchez- Rodríguez C (Hospital General Reina Sofía, Spain); Aguilar-  
33 Jimenez J\*, Baeza-Murcia M, Aguayo-Albasini JL (Morales Meseguer University Hospital, Murcia,  
34 Spain); Nicolás-López T, Alconchel F\* (Hospital Clínico Universitario Virgen de la Arrixaca (IMIB-  
35 Arrixaca), Spain); Fernández Martínez D, Solar-Garcia L, García Flórez LJ\* (Hospital Universitario  
36 Central De Asturias (Huca), Spain); Llaquet Bayo H\* (Hospital de Palamós-SSIBE, Spain); Pujol-Cano N,  
37 Segura-Sampedro JJ\*, Soldevila-Verdeguer C, Jeri-McFarlane S, Gil-Catalan A, Craus-Miguel A, Cruz L,  
38 Valente P, Afonso-Garcia M, Ferrer-Inaebnit E, Oseira-Reigosa A, Fernandez-Vega L, Villalonga-  
39 Ramirez B, Gonzalez Argente FX (Son Espases University Hospital, Spain); Mora-Guzmán I\* (Hospital  
40 Santa Bárbara, Spain); Landete Molina FJ\*, Morera Ocón FJ, Canelles Corell E (Hospital General  
41 Asociado Universitario de Requena, Spain); Gavaldà Pellicé MT\*, Salinas Peña JR, Cavallé Busquets P  
42 (Hospital Universitari Sant Joan, Reus, Spain); Trebol J\*, Sánchez-Casado AB, Munoz-Bellvis L  
43 (Complejo Asistencial Universitario De Salamanca, Spain); Pérez-Sánchez LE\*, Concepción Martín V,  
44 Díaz García A, Vallve-Bernal M (Hospital Universitario Nuestra Señora De Candelaria, Spain); Calvo  
45 Rey A, Prada hervella GM\*, Dos Santos Carregal L, Rodriguez Fernandez MI, Freijeiro M, El Drubi Vega  
46 S (Hospital Clinico Universitario De Santiago De Compostela (Chus), Spain); Picardo AL, Cuadrado-  
47 Garcia A, Serralta de Colsa D, Rojo Lopez JA, Sanchez Cabezudo Noguera F, Ortega Vazquez I\*,  
48 Garcia-Sancho Tellez L, Mato P, Heras Aznar J (Infanta Sofia University Hospital, Spain); Jimeno Fraile  
49 J\*, Morales-Garcia D, Carrillo-Rivas M, Toledo Martínez E, Pascual À (Marqués De Valdecilla University  
50 Hospital, Spain); Senent-Boza A\*, Sánchez-Arteaga A, Benítez-Linero I, Manresa-Manresa F, Tallón-  
51 Aguilar L, Meleró-Cortés L, Fernández-Marín MR, Durán-Muñoz-Cruzado VM, Ramallo-Solís I, Beltrán-  
52 Miranda P, Pareja-Ciuró F, Antón-Eguía BT (Hospital Universitario Virgen Del Rocío, Spain); Oliva  
53 Mompean F, Gomez-Rosado J\*, Reguera-Rosal J, Valdes-Hernandez J, Capitan-Morales L, del Toro  
54 Lopez MD (Hospital Universitario Virgen Macarena, Spain); Achalandabaso Boira M\*, Memba Ikuga R,  
55 Abellán M, Sales R, Olona C, Jorba R (Hospital Universitari De Tarragona Joan XXIII, Spain);  
56 Hernandez Gutierrez J, Tébar Zamora A\* (Complejo Hospitalario De Toledo, Spain); Sancho-Muriel J\*,  
57 Cholewa H, Frasson M (Hospital Universitario Y Politécnico La Fe, Spain); Domenech J, Roselló Añón  
58 A\*, Sangüesa MJ (Hospital Arnau De Vilanova, Spain); Moro-Valdezate D\*, Garcés-Albir M\*, Lopez F\*  
59 (Hospital Clínico Universitario de Valencia, Spain); Bernal-Sprekelsen JC\*, Catalá Bauset JC, Renovell  
60 Ferrer P, Martínez Pérez C, Gil-Albarova O, Gilabert Estellés J, Aghababyan K (Consortio Hospital  
General Universitario, Spain); De Andrés-Asenjo B\*, Beltrán de Heredia J, Vázquez- Fernández A, Ortiz  
de Solorzano-Aurusa FJ, Trujillo-Díaz J, Ruiz-Soriano M, Jezieniecki C, Gómez-Sanz T, Núñez-Del

1  
2  
3 Barrio H, Romero-De Diego A, García-Virto V, Aguado HJ (Hospital Clínico Universitario De Valladolid, Spain); Fernández Martín MT\* (Hospital Medina Del Campo, Spain); Tejero-Pintor FJ\*, Pérez-Saborido  
4 B, Choolani Bhojwani E, Acebes García F, Marcos-Santos P, Bueno Cañones AD, Sanchez Gonzalez J,  
5 Toledano M, Bailón M, Pacheco Sánchez D (Hospital Universitario Río Hortega, Spain); Paniagua  
6 Garcia Senorans M\*, Sanchez-Santos R (Álvaro Cunqueiro Hospital, Spain); Vazquez Melero A\*, Garcia  
7 D, Díez E, Herrero I, Soeda IM, Camuera M, Balluerca M, Sánchez-Rubio M, Paunero Vazquez P  
8 (Hospital Universitario Araba, Spain); Martinez-German A, Gracia-Roche C, Gascon-Ferrer I, Duque-  
9 Mallen V\*, De Miguel-Ardevines MDC, Sanchez-Fuentes N, Santero-Ramirez MS, Matute-Najarro M,  
10 Herrero-Lopez M, Sanchez-Rubio M, Cantalejo-Diaz M, Gonzalez-Nicolas-Trebol MT, Saudi-Moro S,  
11 Jarrod-Ferrer UM (Hospital Universitario Miguel Servet, Spain); Rivas R, Rivas F (Hospital Clinico  
12 Universitario Zaragoza, Zaragoza, Spain); Escartin J\*, Blas Laina JL, Nogués A, Cros B, Talal El-Abur I,  
13 Garcia Egea J, Yanez C (Hospital Royo Villanova, Spain); Jayarajah U\*, Ravindrakumar S, Rodrigo  
14 VSD, Arulanantham A, Bandara GBKD (District General Hospital Chilaw, Sri Lanka); Hamid HKS, Ali EE,  
15 Widatalla ABH, Bakheit I\*, Awadelkarim M (Ibrahim Malik Teaching Hospital, Sudan); Ali karar AA (Al-  
16 Rajhi, Sudan); Saleh M (University of Gezira Hospital, Sudan); Taflin H\* (Sahlgrenska University  
17 Hospital, Sweden); Myrelid P\*, Amorim Braz L (Linköping University Hospital, Sweden); Hagander L\*,  
18 Hambraeus M, Omling E, Saló M (Lund University, Skåne University Hospital,, Sweden); Arkani S\*,  
19 Freedman J\* (Danderyds Hospital, Sweden); Montan C, Lindqvist EK\*, Elbe P, Hultgren R (Karolinska  
20 University Hospital, Sweden); Älgå A\*, Nordberg M, Sandblom G (South General Hospital, Sweden);  
21 Rutegård M\*, Holmner F, Sund M\*, Löfgren N (Umeå University Hospital, Sweden); Tampakis A, Kollmar  
22 O, von Fluee M (Clarunis, University Hospital Basel, Basel, Switzerland); Balaphas A\*, Toso C, Colucci  
23 N, Popeskou SG (Geneva University Hospitals, Switzerland); Gass M\*, Scheiwiller A, Metzger J  
24 (Luzerner Kantonsspital, Switzerland); Gialamas E, Chevallay M, Sauvain M\*, Dwidar O (Pourtales  
25 Neuchatel Hospital, Switzerland); Kiessling SY, Stoeckli SJ\* (Kantonsspital St. Gallen, Switzerland);  
26 Mongelli F, Bernasconi M, Di Giuseppe M, Christoforidis D\*, La Regina D, Arigoni M (Ente Ospedaliero  
27 Cantonale, Switzerland); Adamina M\*, Peros G, Guglielmetti L, Solimene F, Giardini M, Bächler T,  
28 Crugnale AS (Kantonsspital Winterthur, Switzerland); Gutschow CA\*, Turina M (Universitätsspital Zürich,  
29 Switzerland); Ersen O (Ankara University Medical School, Ankara, Turkey); Onan MA\*, Kozan R (Gazi  
30 University Medical Faculty Hospital, Turkey); Erol T\*, Dincer HA (Hacettepe University Hospital, Turkey);  
31 Yildiz A\* (Yildirim Beyazit University Yenimahalle Training and Research Hospital, Turkey); Iflazoglu N,  
32 Yalkın O (Bursa City Hospital, Bursa, Turkey); Isik A\* (Erzincan University Hospital, Turkey); Ozben V\*,  
33 Aytac E, Aliyeva Z, Akaydin E, Ozmen BB, Baca B (Acibadem Atakent Hospital, Turkey); Altinel Y\*,  
34 Calikoglu F, Tokocin M, Hacim NA, Akbas A, Meric S, Vartanoglu T, Yigitbas H, Ercetin C, Ercan G  
35 (Bagcilar Research and Training Hospital, Turkey); Ozgur I\*, Keskin M (Istanbul University Faculty of  
36 Medicine, Istanbul, Turkey); Saracoglu KT\*, Cimenoglu B, Demirhan R, Kale A, Simsek T, Gundogdu EC  
37 (Kartal Dr. Lutfi Kirdar Training and Research Hospital, Turkey); Abbasov A\* (Liv Hospital Ulus, Turkey);  
38 Tanal M\*, Citgez B, Bozkurt E, Yetkin SG, Mihmanli M (University of Health Sciences Sisli Hamidiye Etfal  
39 Training and Research Hospital, Turkey); Alhamed A, Ergun S\*, Sanli AN, Velidedeoglu M, OZcelik k  
40 MF, Uludag SS\*, Zengin AK, Cebi S, Demirkiran F, Bese T, Acikgoz AS, Kayan B, Aykanat Y, Mutlu D  
41 (Istanbul University - Cerrahpasa, Cerrahpasa Medical Faculty, Turkey); Göksoy B\* (Sehit Prof.Dr. İlhan  
42 Varank Training and Research Hospital, Turkey); Kara Y\*, Bozkurt MA, Kocatas A (Kanuni Sultan  
43 Suleyman Training and Research Hospital, Turkey); Öğücü H, Uslu G, Arican C, Tugmen C, Aydin C,  
44 Yesilyurt D, Avci EK, Kebapçı E, Kilinc G, Sert İ, Tuncer K, Akalin M, Emiroglu M, Demirli Atici S\*,  
45 Salimoğlu S, Kaya T\*, Kirmizi Y (University of Health Sciences Tepecik Training and Research Hospital,  
46 Turkey); Tatar OC\*, Yüksel E, Güler SA, Yildirim A, Utkan NZ, Gözal K, Köken H, Yabas A (Kocaeli  
47 University Teaching Hospital, Turkey); Gonullu E, Altintoprak F, Akin E, Kamburoglu B, Capoglu R,  
48 Kucuk F, Demir H, Cakmak G, Firat N, Celebi F, Kocer B, Mantoglu B, Bayhan Z, Dikicier E (Sakarya  
49 University Faculty of Medicine, Turkey); Colak E\*, Kucuk GO (Samsun Training and Research Hospital,  
50 Turkey); Karaman E\*, KolusabA, Karaaslan O (Van Yuzuncu Yil University, Medical Faculty, Turkey);  
51 Majid I, Alshryda S\* (Al Jalila Children's Speciality Hospital, United Arab Emirates); Abbas F\*, Abbas  
52 FMA (Dubai Hospital, United Arab Emirates); Mohammed D\*, Tahlak MA\* (Latifa Women and Children  
53 Hospital, Dubai, United Arab Emirates); Yammahi A, Albaroudi AA, Elyafawi B, Saber A, Khansaheb H,  
54 Alsaadi H\*, Alzarooni N\* (Rashid Hospital, United Arab Emirates); Bekheit M\*, Kamera BS, Elhusseini M,  
55 Sharma P, Ahmeidat A, Gradinariu G, Cymes W, Hannah A, Mignot G, Shaikh S\*, Agilinko J (Aberdeen  
56 Royal Infirmary, United Kingdom); Angelou D, Neely D\*, McCanny A, McAree B (Antrim Area Hospital,  
57 Northern Health and Social Care Trust, United Kingdom); Baldwin AJ, West R\*, Gammeri E, Catton A,  
58 Marinos Kouris S (Stoke Mandeville, Wycombe General, United Kingdom); Pereca J\*, Singh J (University  
59 Hospital Ayr, United Kingdom); Seymour Z\*, Jones R\*, Leeson S, Peavor R, Lala AK, Houlden C (Ysbyty  
60 Gwynedd, United Kingdom); Kahiu J\*, Hossain N, Hosny S (Barnet General Hospital, United Kingdom);  
Patel P\*, Handa S, Kaushal M, Kler A, Reghuram V, Texas S (Furness General Hospital, United

1  
2  
3 Kingdom); Fairhurst K\*, Yates C, Mitchell S, Bunni J, Richards S, George R, Lee SM, Phull J, Frost J\*,  
4 Burnard S, Crowley R, Airey A (Royal United Hospitals Bath, United Kingdom); Bevan K\*, Makin-Taylor  
5 R, Ong CS, Callan R, Bloom O (Bedford Hospital, United Kingdom); Aljanadi F, Moawad N, Jones M\*,  
6 Gregg A, Jeganathan R\* (Royal Victoria Hospital, Belfast, United Kingdom); Pachi M\*, Martin B  
7 (Birmingham Children's Hospital, United Kingdom); Archer JE\*, Odeh A, Siddaiah N (Royal Orthopaedic  
8 Hospital, United Kingdom); Singhal R\*, Naumann DN, Karandikar S\*, Syed A\*, Tucker ON, Alam R,  
9 Kalkat M\* (Heartlands Hospital, United Kingdom); Mak JKC, Kulkarni R, Sharma N, Nankivell P, Tirotta  
10 F, Parente A, Breik O, Kisiel A, Cato LD, Saeed S, Bhangu A\*, Griffiths E\*, Pathanki AM, Ford S\*, Desai  
11 A\*, Almond M\*, Kamal M (Queen Elizabeth Hospital Birmingham, United Kingdom); Sundar S\*, Leung  
12 EYL\*, Kaur R, Brett-Miller C, Buruiana FE (Pan-Birmingham Gynaecological Cancer Centre, United  
13 Kingdom); Markose G, De Gea Rico A, Taib A\*, Myatt D, Sulaiman Khaled A, Younis F\* (East  
14 Lancashire Hospitals NHS Trust, United Kingdom); Sultana A\*, Taggarsari M, Vitone L\*, Lambert J, Vaz  
15 OP, Sarantitis I, Shrestha D, Timbrell S, Shugaba A (Royal Blackburn Hospital, United Kingdom);  
16 Quddus B, Law J, Bittar MN\*, Creanga M, Elniel M, Youssef M\*, Ali S, Qadri ST (Blackpool Victoria  
17 Hospital, United Kingdom); Brixton G, Findlay L, Klatter T, Majkowska A, Manson J\*, Potter R (Royal  
18 Bournemouth Hospital, United Kingdom); Okseloglou V\*, Mosley F\*, De La Cruz Monroy MFI, Bobak P,  
19 Omar I, Ahad S, Langlands F, Brown V, Hashem M (Bradford Royal Infirmary, United Kingdom);  
20 Kennedy L\*, Jaunoo S, Coomber E, Williams O (Royal Sussex County Hospital, United Kingdom);  
21 Shalaby M\*, Rhodes HL (Bristol Royal Hospital for Children, United Kingdom); Williams A, Ridgway A,  
22 Pournaras D, Britton E, Lostis E, Ambler GK, Chu H, Hopkins J\*, Manara J, Chan M, Doe M, Moon RDC,  
23 Lawday S, Jichi T, Singleton W (Southmead Hospital, United Kingdom); Main B, Maccabe T, Newton C\*,  
24 Blencowe NS, Fudulu DP, Bhojwani D, Baquedano M, Caputo M\*, Rapetto F, Flannery, O, Hassan A  
25 (University Hospitals Bristol and Weston NHS Foundation Trust, United Kingdom); Coonar A\*, Aresu G,  
26 Smith C, Gearon D, Hogan J, Pradeep IS, Durio Yates H, Peryt A, Barrett-Brown ZM, King M, Ahmadi N,  
27 Jenkins D\*, Moorjani N, Taghavi F, Wells F (Royal Papworth Hospital, United Kingdom); Hardie J, Page  
28 S, Anazor F, King SD, Luck J, Kazzaz S\* (Frimley Park, Frimley Health NHS FT, United Kingdom);  
29 Mannion R, Stewart GD\*, Ramzi J, Mohan M, Singh AA, Ashcroft J, Baker OJ, Coughlin P\*, Davies RJ\*,  
30 Durst AZED, Abood A, Habeeb A, Hudson VE, Koliass A, Lamb B, Luke L, Mitrasinovic S, Murphy S, Ngu  
31 AWT, O'Neill JR\*, Waseem S, Wong K, Georgiades F, Hutchinson PJ\*, Tan XS, Pushpa-rajah J,  
32 Colquhoun A, Masterson L, Abu-Nayla I, Walker C, Balakrishnan A\*, Rooney S, Irune E, Byrne MHV,  
33 Durrani A (Addenbrooke's Hospital, Cambridge University Hospitals NHS Foundation Trust, United  
34 Kingdom); Simoes A, Eddy B, Streeter E, Ahmed I, Yao M\*, Wang W, Djouani A, Tait-Bailey J, Thomas  
35 M, Hassan F, Kommu S (Kent and Canterbury Hospital, United Kingdom); Chopra S (University Hospital  
36 Llandough, United Kingdom); Richards T\*, Sethuraman Venkatesan A, Combella T\*, Williams J,  
37 Tahhan G, Mohammed M, Kornaszewska M, Valtzoglou V, Deglurkar I\*, Rahman M, Von Oppell U,  
38 Mehta D, Koutentakis M, Syed Nong Chek SAH, Hill G, Morris C\*, Shinkwin M, Torkington J, Cornish J  
39 (University Hospital of Wales, United Kingdom); Houston R, Mannan S\*, Ayeni F, Tustin H, Bordenave  
40 M, Robson A (Cumberland Infirmary, United Kingdom); Dovell G, Preece R, Rolland P\* (Cheltenham  
41 General Hospital, United Kingdom); Miranda BH\* (St Andrew's Centre for Plastic Surgery and Burns,  
42 Chelmsford, United Kingdom); Sobti A, Khaleel A\*, Unnithan A, Memon K, Pala Bhaskar RR, Maqboul F,  
43 Kamel F, Al-Samarrae A, Madani R\*, Kumar L, Nisar P, Agrawal S\* (Ashford and St Peter's Hospital,  
44 United Kingdom); Vimalachandran D\*, Manu N, Eardley N, Krishnan E, Serevina OL, Martin E, Smith C,  
45 Jones A, Roy Mahapatra S, Clifford R (Countess of Chester Hospital, United Kingdom); Jones GP,  
46 Gardner A, Tripathi SS\*, Greenhalgh MS (Lancashire Teaching Hospitals NHS Foundation Trust, United  
47 Kingdom); Matthews W, Mohankumar K, Khawaja I, Palepa A, Doulias T (Colchester University Hospital,  
48 United Kingdom); Gill C, Dunne N, Sarma DR, Godbole C, Carlos W, Tewari N\*, Jeevan D, Naredla P,  
49 Khajuria A, Connolly H, Robertson S, Sweeney C, Di Taranto G, Shanbhag S, Dickson K, McEvoy K,  
50 Skillman J, Sait M, Al-omishy H, Baig M, Heer B (University Hospitals Coventry and Warwickshire NHS  
51 Trusts, United Kingdom); Brown A\* (Darlington Memorial Hospital, United Kingdom); Ebrahim A,  
52 Alwadiya A, Goyal A\*, Phillips A, Bhalla A\*, Demetriou C, Grimley E, Theophilidou E, Ogden E, Malcolm  
53 FL, Davies-Jones G, Ng JCK, Mirza M, Hassan M, Elmaleh N, Daliya P, Williams S, Bateman A\*, Chia Z  
54 (Royal Derby Hospital, United Kingdom); Premakumar Y, Jauhari Y, Koshnow Z, Bowen D, Uberai A,  
55 Hirri F, Stubbs BM\* (Dorset County Hospital, United Kingdom); Crichton R\*, Sonksen J, Aldridge K  
56 (Russell's Hall Hospital, Dudley, United Kingdom); McDonald C\*, Manickavasagam J\*, Ragupathy K\*,  
57 Davison S, Dalgleish S\*, McGrath N, Kanitkar R, Payne CJ, Ramsay L (Ninewells Hospital, United  
58 Kingdom); Ng CE\*, Collier T, Khan K\*, Evans R (University Hospital North Durham, United Kingdom);  
59 Brennan C, Henshall DE, Drake T\*, Harrison EM\*, Zamvar V, Tambyraja A, Skipworth RJE\*, Linder G,  
60 McGregor R, Brennan P, Mayes J, Ross L, Smith S, White T, Jamjoom AAB, Pasricha R (Royal Infirmary  
of Edinburgh, United Kingdom); Gallagher K, Swan R, Paterson H\*, Maeda Y, Kwok AMF, Tsiaousidou  
A, Vaughan-Shaw PG, Boyle C, Fernando D, Tham D, Leung S, Laird A\* (Western General Hospital,



1  
2  
3 United Kingdom); Holme T, Abbott S, Razik A, Thrumurthy S, Steinke J, Baker M\*, Howden D, Baxter Z,  
4 Osagie L, Bence M (Epsom & St Helier University Hospitals NHS Trust, United Kingdom); Fowler GE,  
5 Massey L, Rajaretnam N, Evans J, John J, Goubran A, Campaign N, McDermott FD\*, McGrath JS\*, Ng M,  
6 Pascoe J, Phillips JRA, Daniels IR (Royal Devon and Exeter Hospital, United Kingdom); A'Court J,  
7 Konarski A, Faulkner G\* (Royal Bolton Hospital, United Kingdom); Emerson H, Vejsbjerg K, Pearce L,  
8 McCormick W, Fisher A\*, Singiseti K, Aawsaj Y, Barry C (Gateshead Health NHS Foundation Trust,  
9 United Kingdom); Bajomo O, Rizvi S, Grimes C\*, Dusu K, Tint PY (Medway Hospital, United Kingdom);  
10 Kirk A\*, Irvine V (Golden Jubilee National Hospital, United Kingdom); Lammy S\*, O'Kane R (Royal  
11 Hospital for Sick Children, United Kingdom); Elliott L, McCabe G, Holroyd D\*, Jamieson NB (Glasgow  
12 Royal Infirmary, United Kingdom); Geddes A, McMahon J, McCaul J\*, Al-Azzawi M, Aitken E\*, Glen P\*,  
13 Sinan LOH, Lammy S\*, Grivas A, Tilling EJ (Queen Elizabeth University Hospital, United Kingdom);  
14 Brown O, Boal M, Dean H, Higgs S\*, Stanger S, Abdalaziz H, Constable J, Ishii H, Preece R, Dovell G,  
15 Gopi reddy R (Gloucestershire Royal Hospital, United Kingdom); Madhuri TK\*, Tailor A, Flavin M, Walker  
16 D\*, Humphries S, Assalaarachchi H (Royal Surrey NHS Foundation Trust, United Kingdom); Curl-Roper  
17 T, Westwood E, Delimpalpa C, Liao CCL, Velchuru V\* (James Paget University NHS Foundation Trust  
18 Hospital, United Kingdom); Raptis DA, Pollok JM\*, Machairas N, Davidson B, Fusai G, Soggiu F, Xyda S,  
19 Hidalgo Salinas C, Tzerbinis H, Pissanou T, Gilliland J, Chowdhury S, Varcada M\*, Hart C, Mirnezami R,  
20 Knowles J, Angamuthu N (Royal Free Hospital, United Kingdom); Vijay V\*, Shakir T, Hasan R, Tansey R  
21 (Princess Alexandra Hospital, Harlow, United Kingdom); Hardie C, Powell-Smith E\* (Harrogate District  
22 Hospital, United Kingdom); Kashora F\*, Siddique MH, Singh A, Barmpagianni C, Basgaran A, Basha A,  
23 Okechukwu V, Bartsch A, Gallagher P, Maqsood A, Sahnun K, Leo CA, Lewis SE, Ubhi HK, Exley R,  
24 Khan U, Shah P, Saxena S, Zafar N, Abdul-Jabar H (Northwick Park Hospital, United Kingdom); Patel M,  
25 Shabana A, Alanbuki A\*, Usman O (Brighton and Sussex NHS Trust, Princess Royal Hospital, United  
26 Kingdom); Ong CT, Butterworth W\*, Budha Magar O, El Hadi M, Abas S, Annett J (Hereford County  
27 Hospital, United Kingdom); Ross E, Loubani M\*, Wilkins A, Cao H, Capitelli-McMahon H, Hitchman L,  
28 Ikram H, Andronic A, Aboelkassem Ibrahim A, Totty J (Hull University Teaching Hospitals NHS Trust,  
29 United Kingdom); Blanco J\*, Vanker R, Ghobrial M, Jones G, Kanthasamy S, Fawi H, Awadallah M,  
30 Chen F, Cheung J\* (Hinchingsbrooke Hospital, United Kingdom); Moscalu A\*, Bhuvanakrishna T, Bibby L,  
31 Sinclair M (Ipswich Hospital, United Kingdom); Nahid MAK\*, Williams L, Basnyat PS, Shrestha AK\*  
32 (William Harvey Hospital, United Kingdom); Kumaran NK, Sambhwani S, Sheikh NA, Taylor OM\*  
33 (Kettering General Hospital, United Kingdom); Liew I\*, Al-Sukaini A, Mediratta S, Saxena D (Queen  
34 Elizabeth Hospital King's Lynn, United Kingdom); Sgrò A, Rashid MM, Milne K, McIntyre J, Akhtar MA\*,  
35 Turnbull A, Brunt A, Stewart KE (Victoria Hospital Kirkcaldy, United Kingdom); Wilson MSJ\*, Rutherford  
36 D, McGivern K, Massie E (Forth Valley Royal Hospital, United Kingdom); Ho M\*, Wade RG\*, Johnstone  
37 J, Bourke G, Brunelli A, Elkadi H, Otify M\*, Pompili C, Burke JR, Bagouri E, Chowdhury M, Abual-Rub Z,  
38 Kaufmann A, Munot S, Lo T\*, Young A, Kowal M, Wall J, Peckham-Cooper A (The Leeds Teaching  
39 Hospitals NHS Trust, United Kingdom); Layton GR\*, Karki B, Jeong H, Pankhania S, Asher S, Folorunso  
40 A, Mistry S, Singh B, Winyard J, Mangwani J (Leicester General Hospital, United Kingdom); Caruana  
41 EJ\*, Mohammad A, Acharya M, Chandarana K, Ang K, Chowdhry MF, Rathinam S, Nakas A (Glenfield  
42 Hospital, United Kingdom); Boddy A\*, Hossain T, Ashmore C, Annamalai S, Kourdouli A, Irvine E, Al-  
43 Harbawi A, Kassam K\*, Al-Harbawee A, Miller A, Mair M (Leicester Royal Infirmary, United Kingdom);  
44 Lunevicius R\*, Sheel ARG, Sundhu M, Santini AJA, Fathelbab MSAT, Hussein KMA, Nunes QM, Jones  
45 RP, Shahzad K, Haq I, Baig MMAS, Hughes JL, Kattakayam A, Rajput K, Misra N, Shah SB, Clynch AL,  
46 Georgopoulou N, Sharples HM, Apampa AA, Nzenwa IC, Sud A (Aintree Hospital, Liverpool University  
47 Hospitals NHS Foundation Trust, United Kingdom); Harky A, Kirmani BH\*, Shackcloth M (Liverpool Heart  
48 and Chest Hospital, United Kingdom); Jenkinson MD\*, Zakaria R, Elmoslemany T, Millward CP (The  
49 Walton Centre NHS Foundation Trust, United Kingdom); Baron R\*, Dunne D, Szatmary P, Thomas A,  
50 McNicol F, Gahunia S, Sochorova D, Nita GE, McKinney R, Russ J, Tan JR (Royal Liverpool University  
51 Hospital, United Kingdom); Harwood R, Corbett H J (Alder Hey In The Park, United Kingdom);  
52 Rossborough C, Skelly BL (Altnagelvin Area Hospital, United Kingdom); Che Bakri NA, Nazarian S,  
53 Vashisht R\*, Jiao L, Jawad Z (BUPA Cromwell Hospital, United Kingdom); Allan AY, Kontovounisios C,  
54 Grove T, Warren O\*, Fadel MG (Chelsea and Westminster Hospital, United Kingdom);  
55 Chatzikonstantinou M, Sorelli P\*, Rahman S, Hadjipavlou M (Queen Elizabeth Hospital, Woolwich,  
56 United Kingdom); Holbrook C, Chong C, Kufeji D (Evelina London Children's Hospital, London, United  
57 Kingdom); Rufai SR, Lloyd IC, James G\*, Chari A, Silva AHD (Great Ormond Street Hospital for  
58 Children, United Kingdom); Stroman L, Challacombe B\*, Sayasneh A\*, Najdy M, Billè A, Fraser S,  
59 Agoston P, Rizzo V, King J, Nath R, McCrindle Sarah, Mehra G, Harrison-Phipps K, Pilling J, Okiror L,  
60 Routledge T, Mills L, Wali A, El-Boghdadly K\* (Guy's Hospital, United Kingdom); Fotopoulou C\*, Saso S,  
Fehervari M\*, Ploski J, Ghaem-Maghani S, Spalding D, Rajagopal P, Pai M, Habib N, Jawad Z,  
Hamrang-Yousefi S, Jiao L (Hammersmith Hospital, United Kingdom); Tayeh S\*, Chase T, Humphreys L,

1  
2  
3 Ayorinde J, Ghanbari A, Cuming T (Homerton University Hospital, United Kingdom); Anscomb N\*,  
4 Baldwin-Smith R, Rizk M, Grainger C, Davies M, A Surendran, Nunoo-Mensah JW (King's College  
5 Hospital, United Kingdom); Dunstan M\*, Beak P, Gerogiannis I\* (Kingston Hospital NHS Foundation  
6 Trust, United Kingdom); Jain A, Menon A, Pramodana B, Choi D\*, Marcus HJ, Webber L, May R,  
7 Hutchison R, Luoma V (The National Hospital for Neurology and Neurosurgery, United Kingdom); Ranjit  
8 S, Parakh J, Sarodaya V, Daadipour A, Khalifa M (Newham University Hospital, United Kingdom); Bosch  
9 KD\*, Bashkirova V, Dvorkin LS, Kalidindi VK (North Middlesex University Hospital, London, United  
10 Kingdom); Dudek J, Singhal T\*, El-Hasani S (Princess Royal University Hospital, United Kingdom); De  
11 Souza A, Cannoletta M, Rochon M, Bhudia S (Royal Bromtpon Hospital, London, United Kingdom);  
12 Bennett S, Navaratne L, Venn M, Yip V\*, Kayani B, Sohrabi C, Kocher HM, Minicozzi A, Banerjee A,  
13 Sullivan T, Sivaprakasam R\*, Anzak A, Ghufloor K\*, Thaha MA\*, Knowles C, Ledesma FS, Patki P\*,  
14 Popova D, Sadigh P\*, Ramamoorthy R, Uff C\*, Attwell L, Tanabalan C, Goh MA, Jayasinghe JD, Leal  
15 Silva I, Thakur B, Lebe M, Thet MS, Hughes F\*, Rahman R, Fuwa O (Royal London Hospital, United  
16 Kingdom); Sanders J\*, Oo A, Bueser T, Curtis M, Stamenkovic SA (Cardiac Unit, St Bartholomew's  
17 Hospital, United Kingdom); Abbott T\*, Anwar S, Sohrabi C (St Bartholomew's Hospital, United Kingdom);  
18 Williams K\*, Chung E, Hagger R, Karim A, Hainsworth A, Flatman M, Trompeter A, Hing C, Brown O,  
19 Tsinaslanidis P, Benjamin MW, Leyte A, Tan C, Smelt J, Vaughan P, Santhirakumaran G, Hunt I, Raza  
20 M, A Labib (St George's Hospital, United Kingdom); Luo X, Sudarsanam A, Rolls A, Lyons O, Onida S,  
21 Shalhoub J, Sugand K, Park C, Sarraf KM\*, Erridge S, Kinross J\*, Denning M, Yalamanchili S, Abuown  
22 A, Ibrahim M, Martin G (St Mary's Hospital, United Kingdom); Davenport D, Wheatstone S\* (St Thomas'  
23 Hospital, United Kingdom); Kasivisvanathan V\*, Kapriniotis K, Elhamshary A, Imam SMB (University  
24 College London Hospital At Westmoreland Street, United Kingdom); Kalavrezos N\*, Sinha D, Chand M  
25 Green L, Beech N, McEwen R, Kiconco H (University College London Hospital, United Kingdom);  
26 Andreani SM\*, Bath MF, Sahni A, Judkins N, Rigueros Springford L, Sohrabi C, Bacarese-Hamilton J,  
27 Taylor FG, Patki P\*, Tanabalan C (Whipps Cross University Hospital, United Kingdom); Parmar C\*,  
28 McCluney S, Shah S (The Whittington Hospital, United Kingdom); Talwar R\*, Patel K, Askari A,  
29 Jambulingam P S, Shaw S, Maity A, Hatzantonis C, Sagar J, Kudchadkar S, Cirocchi N, Chan CH (Luton  
30 and Dunstable University Hospital, United Kingdom); Reynolds J, Alexander ME, Smart CJ\*  
31 (Macclesfield District General Hospital, United Kingdom); Jayasankar B, Balasubramaniam D\*, Abdelsaid  
32 K, Mundkur N, Gallagher B\* (Tunbridge Wells Hospital, United Kingdom); Shah J\*, Anthoney J,  
33 Emmerson O (North Manchester General Hospital, United Kingdom); Stylianides N\*, Abdalla M, Newton  
34 K, Bhatia K\*, Edmondson R, Abdeh L, Jones D, Zeiton M, Ismail O, Naseem H, Advani R (Manchester  
35 Royal Infirmary, United Kingdom); Duff S\*, Moura F, Brown BC, Khan A, Asaad P, Wadham B, Aneke IA,  
36 Collis J, Warburton H (Wythenshawe Hospital, Manchester University NHS Foundation Trust, United  
37 Kingdom); Fell A\*, Smith A, Halkias C, Evans J, Nikolaou S, English C\*, Kristinsson S, Oni T, Ilahi N,  
38 Ballantyne K, Woodward Z, Merh R (Queen Elizabeth The Queen Mother Hospital Margate, United  
39 Kingdom); Dunning J, Viswanath Y, Freystaetter K, Dixon J\*, Hadfield JN, Hilley A, Egglestone A, Smith  
40 B (James Cook University Hospital, United Kingdom); Hine T, Keeler B\*, Soulsby RE, Taylor A\* (Milton  
41 Keynes University Hospital, United Kingdom); Davies E\*, Ryska O, Raymond T, Rogers S\*, Tong A,  
42 Hawkin P (Royal Lancaster Infirmary, United Kingdom); Tingle S, Abbadessa F, Sachdeva A, Rai B\*,  
43 Chan CD, McPherson I, Booth K, Mahmoud Ali F, Pandanaboyana S, Grainger T, Nandhra S, Patience  
44 A, Rogers A\*, Roy C, Williams T, Dawe N, McCaffer C, Riches J, Bhattacharya S, Moir J, Kalson NS,  
45 Elamin Ahmed H, Mellor C, Saleh C, Koshy RM, Hammond J\*, Sanderson L, Wahed S, Phillips AW,  
46 Ghosh K\* (Newcastle Upon Tyne Hospitals NHS Foundation Trust, United Kingdom); Tang A, Beamish  
47 AJ, Price C, Bosanquet D\*, Magowan D, Solari F, Williams G, Nassa H, Smith L (Royal Gwent Hospital,  
48 United Kingdom); Robertson-Smith B, Mahmoud A, Ameerally P, Finch JG\*, Gnanachandran C, Pop I,  
49 Rogers M, Yousef Y, Mohamed I, Woods R, Zahid H, Mundy G\* (Northampton General Hospital, United  
50 Kingdom); Youssef M\*, Sreedharan L, Baskaran D, Shaikh I, Seebah K, Reid J, Watts D, Kouritas V,  
51 Chrastek D, Maryan G, Gill DF, Khatun F (Norfolk and Norwich University Hospital, United Kingdom);  
52 Gajjar K, Williamson K, Bratt D, Konstantinidi K, Walton T\*, Burnside N\*, Weaver H, Hawari M, Addae-  
53 Boateng E, Rollett RA\*, Collins ML, Tamimy MS, Riyat H, Wen J, Neil-Dwyer J (Nottingham City  
54 Hospital, United Kingdom); Brewer H, Humes D\*, Worku D, Chowdhury A\*, Oyende O, Lewis-Lloyd C,  
55 Adiamah A, Koh A, Jackman J, Vohra R\*, Navarro A\*, Reilly J (Queens Medical Centre, United  
56 Kingdom); Aujayeb A, Townshend D\*, McLarty N, Shenfine A, Jackson K, Johnson C (Northumbria NHS  
57 Hospital Trust, United Kingdom); Dass D, Ford D (Robert Jones and Agnes Hunt Orthopaedic Hospital,  
58 United Kingdom); Winter SC\*, Belcher E\*, Stavroulias D, Di Chiara F, Wallwork K, Qureishi A, Lami M,  
59 Sravanam S, Mastoridis S, Shah K, Chidambaram S, Smillie R, Shaw AV, Bandyopadhyay S, Cernei C,  
60 Bretherton C, Jeyaretna D\*, Ganau M\*, Piper RJ\*, Duck E, Brown S, Jelley C, Tucker SC\*, Bond-Smith  
G\*, Griffin XL\*, Tebala GD, Neal N\*, Vatish M\*, Noton TM, Ghattaura H, Maher M, Fu H, Risk OBF,  
Soleymani majd H, Sinha S\*, Shankar S, Aggarwal A, Kharkar H, Lakhoo K\*, Verberne C, Mastoridis S



(Oxford University NHS Foundation Trust, United Kingdom); Dean B\*, Luney C, Myatt R, Williams MA, McVeigh J (Nuffield Orthopaedic Centre, United Kingdom); Rogers LJ\*, Labib PL, Miller D, Minto G, Hope N, Marchbank A, Emslie K, Panahi P, Ho B, Perkins C, Clough E, Roy H, Enemosah I, Campbell R, Natale J, Gohil K, Rela M, Raza N, (Derriford Hospital, United Kingdom); Biliatis I\* (Poole Hospital, United Kingdom); Khan J\*, Thiruchandran G, Toh SKC\*, Ahmad Y\*, Allana A, Bellis C, Babawale O, Phan YC, Lokman U, Ismail M, Koc T, Witek A, Duggleby L, Shamoon S, Stefan S, Clancy H (Queen Alexandra Hospital, United Kingdom); Chadha R\*, Middleton SB, Wilmott K, Hayden C, McLaren C, Sutton J, Whyte A (Royal Berkshire Hospital, United Kingdom); Belgaumkar A\*, Day A, Gilbert C, Oyewole B, Narayan P, Dent H, Sandhya A, De Silva T, Waheed S (Surrey and Sussex Healthcare NHS Trust, United Kingdom); Day A, Kapoor K, Belgaumkar AP\*, Narayan P, Fahim M, (East Surrey Hospital, United Kingdom); Gala T, Mithany R, Morgan R\*, Abdelkarim M, Ibrahim S, Maw A\*, Asqalan A, Sundaram Venkatesan G (Glan Clwyd Hospital, United Kingdom); Singh S, Mukherjee S\*, Ferguson D, Smith C, Mansuri A, Thakrar A, Wickramarachchi L, Cuthbert R, Sivayoganathan S, Chui K, Karam E, Dott C, Shankar S (Queen's Hospital Romford, United Kingdom); Madhvani K, Hampton M, Hormis AP\* (Rotherham District General Hospital, United Kingdom); Thomas M, Pearce L\*, Fountain DM, Laurente R, Sigamoney KV, Dasa M, George K\*, Naqui Z\*, Galhoum M, Lipede C, Gabr A, Radhakrishnan A, Hasan MT, Kalenderov R, Pathmanaban O, Colombo F, Chelva R (Salford Royal NHS Foundation Trust, United Kingdom); Branagan G\*, Longstaff L, Ding D, Barlow C, Foster J (Salisbury NHS Foundation Trust, United Kingdom); Edwards J\*, Ward A, Tadross D, Majkowski L, Blundell C, Forlani S, Nair R, Guha S, Brown SR, Steele C, Kely CJ\*, Newman T, Lee M, Chetty G\*, Lye G, Balasubramanian SP, Sureshkumar Shah N, Sherif M, Al-mukhtar A, Whitehall E, Giblin A, Wells F, Sharkey A, Adamec A, Madan S (Sheffield Teaching Hospital NHS Foundation Trust, United Kingdom); Narice B, Sterrenburg M, Thompson A, Varley I, Stavrakas M, Rominiyi O, Ray J, Adamec A, Crank M, Bacon A, Al-Tamimi Y, Catto J, Saad S, Abd Kahar NN, Sinha S (Royal Hallamshire Hospital, United Kingdom); Sou A, Simpson D, Hamilton E\*, Blair J (Shrewsbury and Telford Hospitals, United Kingdom); Jallad S, Lord J, Anderson C, El Kafsi J\*, Logishetty K\*, Saadya A, Midha R, Ip M, Subbiah Ponniah H, Stockdale T, Bacarese-Hamilton T, Foster L, James A, Anjarwalla N, Marujo Henriques D, Hettige R, Baban C, Tenovici A, Salerno G (Wexham Park, Frimley Health NHS FT, United Kingdom); Singh R\*, Lane J, Colvin HV, Badran A\*, Cadarsa A, Williams S, Cumpstey A, Hamady Z, Aftab R, Wensley F, Byrne J, Morrison-Jones V, Sekhon GK, Shields H, Shakoor Z, Yener A, Talbot T, Khan A, Alzetani A\*, Cresner R (Southampton General Hospital, United Kingdom); Babu BHB\*, Liyanage ASD, Newman S, Blake I, Weerasinghe C (Southport and Formby District General Hospital, United Kingdom); Baumber R, Parry J\* (Royal National Orthopaedic Hospital, United Kingdom); Menakaya C\*, Webb JI, Antar M, Modi N, Sofat R, Noel J, Nunn R, Adegbola S, Eriberto F, Sharma V, Tanna R, Lodhia S (East and North Hertfordshire NHS Trust, Lister Hospital, United Kingdom); Johnson D\*, Hughes I, Hall J, Rooney J, Chatterji S, Zhang Y, Owen R, Rudic M, Hunt J (Stepping Hill Hospital, United Kingdom); Zakai D, Thomas M\*, Aladeojebi A, Ali M, Gaunt A\*, Barmayehvar B, Kitchen M, Gowda M, Mansour F, Jarvis M, Halliday E, Lefroy R, Nanjiah P, Ali S, Kitchen M\* (Royal Stoke University Hospital, United Kingdom); Lin DJ, Rajgor AD, Scurrah RJ, Kang C, Watson LJ, Harris G, Royle T\*, Cunningham Y, James G, Steel B, Luk ACO (Sunderland Royal Hospital, United Kingdom); Boulton AJ, Khan T, Bakolas G, Ahmed I\* (Good Hope Hospital, United Kingdom); Herrod P, Gemmill E\*, Boyd-Carson H, Jibreel M, Lenzi E, Saafan T, Sapre D (King's Mill Hospital, United Kingdom); Li Z\*, Parkins K, Spencer N, Harries R, Egan RJ, Motter D, Jenvey C, Mahoney R, Fine N, Minto T, Henry A (Morrison Hospital Swansea, United Kingdom); Hollyman M\*, Grieco C, Gemmill C (Musgrove Park Hospital, United Kingdom); Whitmore H, Babar MS, Goodrum S, Scott R, Collard B, Lau K, Thomas E, Patel A, Allison J, Bowen J (Torbay and South Devon NHS Trust, United Kingdom); Dias A, Mahendran B, Gopalswamy S\* (Royal Cornwall Hospital, Truro, United Kingdom); Patil S, Scott L, Sarveswaran J\*, Michel M, Ravindran S (Pinderfields Hospital, United Kingdom); Subba K, Abou-Foul AK, Khalefa M, Hossain F\*, Moores T, Pickering L (Walsall Manor Hospital NHS Trust, United Kingdom); Stables G\*, Doorgakant A\*, Thiruvassagam VG, Carter J, Reid S, Mohammed R, Marlow W (Warrington & Halton Teaching Hospitals NHS Trust, United Kingdom); Ferguson H\*, Wilkin R, Konstantinou C, Yershov D, Vatish J, Denning A (South Warwickshire NHS Foundation Trust, United Kingdom); Shah HB, Cross GWV, Seyed-Safi P\*, Smart YW, Kuc A, Al-Yaseen M (Watford General Hospital, United Kingdom); Olivier J\*, Hanna M, Eskander P, Duncan R, Halaseh S (Weston General Hospital, United Kingdom); Das R\* (Hampshire Hospitals NHS Trust, United Kingdom); Wynn Jones H, Divecha H\*, Whelton C, Board T (Wrightington, Wigan & Leigh NHS Foundation Trust, United Kingdom); Powell S\*, Magee C\*, Agarwal K\*, Mangos E, Nambirajan T (Wirral University Teaching Hospital, United Kingdom); Vidya R\*, Chauhan G, Kaur J, Burahee A, Bleibleh S, Pigadas N\*, Snee D, Bhasin S\*, Crichton A, Habeebullah A, Bodla AS, Yassin N\*, Mondragon M, Dewan V (Royal Wolverhampton NHS Trust, United Kingdom); Flindall I, Mahendran V, Hanson A (Worcestershire Royal Hospital, United Kingdom); Jenner E, Richards J, Thomas-Fernandez K, Wall R (Worcestershire Acute

Hospitals NHS Trust, United Kingdom); Alqallaf A, Ben-Sassi A\*, Mohamed I, Mellor K, Joshi P, Joshi Y (Wrexham Maelor Hospital, United Kingdom); Young R\*, Miu V, Sheridan K, MacDonald L, Green S, Onos L (York Teaching Hospitals NHS Trust, United Kingdom); Wong JJ, Napolitano L\*, Hemmila M (Michigan Medicine, United States); Amin D\*, Abramowicz S, Roser SM (Emory University, United States); Olson KA, Riley C, Heron C, Cardenas T\*, Leede E, Thornhill M, Haynes AB\*, McElhinney K, Roward S, Trust MD\*, Hill CE, Teixeira PG\* (Dell Seton Medical Center at the University of Texas at Austin, United States); Etchill E, Stevens K\*, Ladd MR, Long C, Rose J, Kent A, Yesantharao P, Vervoort D, Jenny H, Gabre-Kidan A, Margalit A, Tsai L, Malapati H, Yesantharao L (Johns Hopkins Hospital, United States); Abdou H, Diaz J\*, Richmond M, Clark J, O'Meara L, Hanna N (University of Maryland Medical Center, United States); Ying Y\*, Fleming J, Ovaitt A, Gigliotti J, Fuson A (University of Alabama Birmingham, United States); Cooper Z\*, Salim A\*, Hirji SA, Brown A, Chung C, Hansen L, Okafor BU, Roxo V, Raut CP, Jolissaint JS, Mahvi DA (Brigham and Women's Hospital, United States); Kaafarani H\*, Breen K, Bankhead-Kendall B, Alser O, Mashbari H, Velmahos G, Maurer LR, El Moheb M, Gaitanidis A, Naar L, Christensen MA, Kapoen C, Langeveld K, El Hechi M, Mokhtari A (Massachusetts General Hospital, United States); Haqqani MH, Drake FT\* (Boston Medical Center, United States); Goldenberg-Sandau A\*, Galbreath B (Cooper University Hospital, United States); Reinke C\*, Ross S, Thompson K, Manning D, Perkins, R (Atrium Health Carolinas Medical Center, United States); Eriksson E\*, Evans H (Medical University of South Carolina, United States); Masrur M, Giulianotti P, Benedetti E (University of Illinois at Chicago, Chicago, IL, United States); Chang G\*, Ourieff J, Dehart D (Mount Sinai Hospital, United States); Dorafshar A, Price T, Bhama AR, Torquati A\*, Cherullo E, Kennedy R, Myers J (Rush University Medical Centre, United States); Rubin K\* (University Hospitals of Cleveland, United States); Ban VS\*, Aoun SG, Batjer HH, Caruso J (University of Texas Southwestern, United States); Carmichael H, Velopoulos CG\*, Wright FL, Urban S, McIntyre Jr RC, Schroepfel TJ\*, Hennessy EA, Dunn J\*, Zier L (University of Colorado Hospital/Memorial Hospital/Medical Center of the Rockies, United States); Burlew C\*, Coleman J\* (Denver Health, United States); Colling KP\* (Saint Mary's Medical Center-Essentia Health, United States); Hall B, Rice HE\*, Hwang ES, Olson SA, Moris D (Duke University Medical Center, United States); Verma R\*, Hassan R (Nassau University Medical Center, United States); Volpe A, Merola, S (NewYork Presbyterian Queens, Flushing, United States); O'Banion LA\*, Lilienstein J, Dirks R (University of California San Francisco-Fresno, United States); Marwan H\*, Almasri M\*, Kulkarni G, Mehdi M, Abouassi A, Abdallah M, San Andrés M, Eid J, Aigbivbalu E, Sundaresan J, George B (University of Texas Medical Branch, United States); Ssentongo A, Ssentongo P, Oh JS, Hazelton J\*, Maines J, Gusani N, Garner M, Horvath S (Pennsylvania State University, United States); Zheng F\* (Houston Methodist Hospital, United States); Ujiki M (Northshore University Healthsystem, United States); Kinnaman G, Meagher A\*, Sharma I, Holler E (Iu Health Methodist Hospital, United States); McKenzie K\*, Chan J, Fretwell K, Nugent III W, Khalil A, Chen D, Post N, Rostkowski T, Brahmhatt D (Jamaica Hospital, United States); Huynh K, Hibbard ML (Kaiser Permanente West Los Angeles, United States); Schellenberg M\* (Lac+Usc Medical Center, United States); Martin RCG\*, Bhutiani N (University of Louisville Hospital and Norton Hospital, Louisville, United States); Giorgakis E\*, Laryea J, Bhavaraju A, Sexton K, Roberts M, Kost M, Kimbrough M, Burdine L, Kalkwarf K, Robertson R (University of Arkansas for Medical Sciences, United States); Gosain A\*, Camp L, Lewit R (Le Bonheur Children's Hospital, United States); Kronenfeld JP, Urrechaga E, Goel N, Rattan R, Hart V\*, Allen M, Gilna G (Jackson Memorial Hospital, United States); Cioci A, Ruiz G\*, Allen M, Rakoczy K, Pavlis W, Saberi R (University of Miami Hospital, United States); Morris R\*, Karam BS (Froedtert Hospital, United States); Brathwaite CEM\*, Liu H, Petrone P, Hakmi H, Sohail AH, Baltazar G, Heckburn R (NYU Langone Health-NYU Winthrop Hospital, United States); Nygaard RM\*, Colonna ET, Endorf FW, Hill MJ (Hennepin Healthcare, Minneapolis, United States); Maiga A, Dennis B\*, Levin JH, Lallemand M (Vanderbilt University Medical Center, United States); Choron R, Peck G\*, Soliman F, Rehman S (Robert Wood Johnson University Hospital, United States); Glass N\*, Juthani B, Deisher D (The University Hospital, United States); Ruzgar NM, Ullrich SJ\*, Sion M\* (Yale New Haven Hospital, United States); Paranjape C\*, El Moheb M, Kar AR (Newton Wellesley Hospital, United States); Gillezeau C, Rapp J, Taioli E, Miles BA\*, Alpert N (Mount Sinai Hospital, United States); Podolsky D\*, Coleman NL, Callahan MP (NewYork-Presbyterian / Columbia University Medical Center, United States); Ganly I\*, Brown L (Memorial Sloan Kettering Cancer Center, United States); Monson JRT (AdventHealth Orlando, Orlando, United States); Dehal A\* (Kaiser Permanente Panorama City Medical Center, United States); Abbas A, Soliman A, Kim B, Jones C, Dauer, MD E, Renza-Stingone E, Hernandez E, Gokcen E, Kropf E, Sufirin H, Hirsch H, Ross H, Engel J, Sowards J, Diaz J, Poggio J, Sanserino K, Rae L, Philp M\*, Metro M, McNelis P, Petrov R, Rehman S, Pazonis T (Temple University Hospital, United States); Till B, Lamm R, Rios-Diaz AJ, Palazzo F\* (Thomas Jefferson University Hospital, United States); Rosengart M\*, Nicholson K (University of Pittsburgh Medical Center, United States); Carrick MM\*, Rodkey K (Medical City Plano, United States); Suri A, Callcut R\* (UC Davis Medical Center, United

1  
2  
3 States); Nicholson S\*, Talathoti N (UT Health San Antonio (UTHSA), University Hospital (UHS), San  
4 Antonio, United States); Klaristenfeld D\* (Kaiser Permanente San Diego Medical Center, United States);  
5 Biffi W\*, Marsh C, Schaffer K (Scripps Memorial Hospital, United States); Berndtson AE\*, Averbach S,  
6 Curry T (University of California San Diego, United States); Kwan-Feinberg R\*, Consorti E, Gonzalez R,  
7 Grolman R, Liu T, Merzlikin O (Alta Bates Summit Medical Center (Sutter Health), United States); Abel  
8 MK, Ozgediz D, Boeck M, Kornblith LZ\*, Nunez-Garcia B, Robinson B, Park P (University of California  
9 San Francisco (UCSF), United States); Utria AF, Rice-Townsend SE\*, Javid P, Hauptman J, Kieran K  
10 (Seattle Children's Hospital, United States); Nehra D\*, Walters A, Cuschieri J, Davidson GH (Harborview  
11 Medical Center, United States); Nunez J\*, Cosker R (University of Utah Healthcare, Salt Lake City,  
12 United States); Eckhouse S\* (Washington University School of Medicine, United States); Choudhry A,  
13 Marx W\* (Sunny Upstate University Hospital, United States); Jamil T\*, Seegert S, Al-Embideen S  
14 (ProMedica Toledo Hospital, United States); Quintana M\*, Jackson H (The George Washington  
15 University Hospital, United States); Wexner SD, Kent I (Cleveland Clinic Florida, Weston, United States);  
16 Martins PN\* (University of Massachusetts, UMass Memorial Hospital, United States); Alshehari M\*, Al-  
17 Naggari H\*, Alsayadi M, Alyazidi M, Shream S, Alhaddad W, Maqus A, Abu Hamra'a M, Alsayadi R,  
18 Ghannam R, Al-Maqtari S, Masdoos S, Al-Harazi Y, Bajjah H (Al-Thawra Modern General Hospital,  
19 Yemen); Al-ameri S, Aldawbali M (Royal Hospital, Yemen); Gwini GP\* (Mpilo Central Hospital,  
20 Bulawayo, Zimbabwe); Mazingi D\* (Parirenyatwa hospital, Harare, Zimbabwe)

21  
22 **Acknowledgements:** Xiao Liu, Alistair Denniston, Royal College of Surgeons of England COVID-19  
23 Research Group  
24  
25  
26  
27  
28  
29  
30  
31  
32  
33  
34  
35  
36  
37  
38  
39  
40  
41  
42  
43  
44  
45  
46  
47  
48  
49  
50  
51  
52  
53  
54  
55  
56  
57  
58  
59  
60

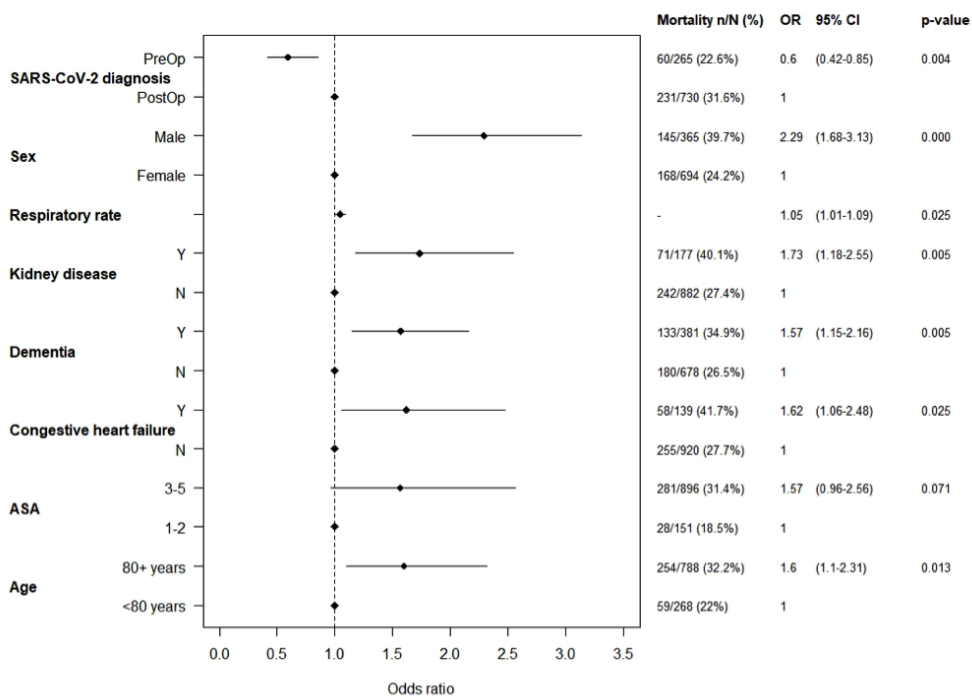

Fig. 1 Mixed-effects logistic regression model for 30 day mortality

1  
2  
3  
4  
5  
6  
7  
8  
9  
10  
11  
12  
13  
14  
15  
16  
17  
18  
19  
20  
21  
22  
23  
24  
25  
26  
27  
28  
29  
30  
31  
32  
33  
34  
35  
36  
37  
38  
39  
40  
41  
42  
43  
44  
45  
46  
47  
48  
49  
50  
51  
52  
53  
54  
55  
56  
57  
58  
59  
60

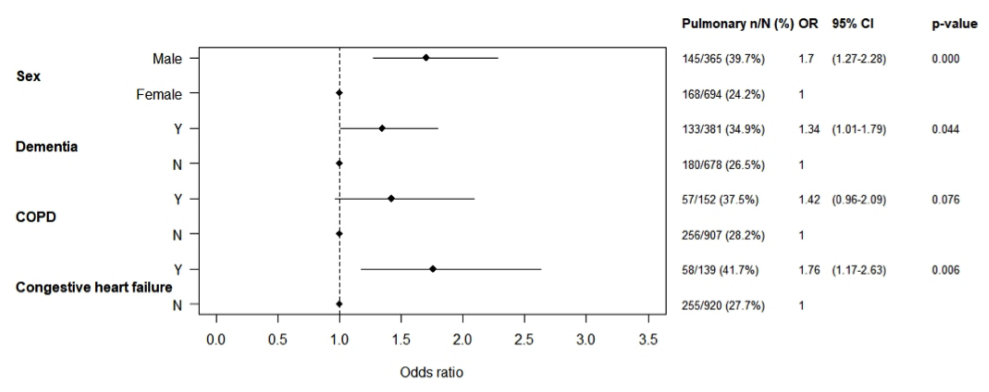

Fig. 2. Mixed-effects logistic regression model for pulmonary complications

1  
2  
3  
4  
5 **Supplementary Material**  
6  
7  
8  
9

10 **Table S1. Baseline characteristics (sex, age, ASA grade, cardiac risk, time of diagnosis, method of diagnosis and month study participant**  
11 **recruited) of the full study population (n = 1063), and died (n = 313) and alive (n =746) groups; p-values are for Fisher's exact tests**  
12 **comparing groups for each characteristic.**  
13  
14

| Characteristic                       | Full<br>(n = 1063) | Alive<br>(n = 746) | Died<br>(n = 313) | Died (%) |
|--------------------------------------|--------------------|--------------------|-------------------|----------|
| <i>Sex (p-value = &lt;0.001 ***)</i> |                    |                    |                   |          |
| Female                               | 696 (65.5%)        | 526                | 168               | 24.2     |
| Male                                 | 367 (34.5%)        | 220                | 145               | 39.7     |
| Missing                              | 0 (0.0%)           | 0                  | 0                 | 0.0      |
| <i>Age (p-value = 0.001 **)</i>      |                    |                    |                   |          |
| 20-29 years                          | 3 (0.3%)           | 3                  | 0                 | 0.0      |
| 30-39 years                          | 2 (0.2%)           | 1                  | 1                 | 50.0     |
| 40-49 years                          | 4 (0.4%)           | 3                  | 1                 | 25.0     |
| 50-59 years                          | 24 (2.3%)          | 21                 | 3                 | 12.5     |
| 60-69 years                          | 50 (4.7%)          | 39                 | 11                | 22.0     |
| 70-79 years                          | 189 (17.8%)        | 145                | 43                | 22.9     |
| 80-89 years                          | 507 (47.7%)        | 360                | 144               | 28.6     |
| 90+ years                            | 284 (26.7%)        | 174                | 110               | 38.7     |
| Missing                              | 0(0.0%)            | 0                  | 0                 | 0.0      |
| <i>ASA (p-value = 0.001 **)</i>      |                    |                    |                   |          |
| 1-2                                  | 151 (14.2%)        | 123                | 28                | 18.5     |
| 3-5                                  | 899 (84.6%)        | 615                | 281               | 31.4     |
| Missing                              | 13(1.2%)           | 8                  | 4                 | 30.8     |

1  
2  
3  
4  
5  
6  
7  
8  
9  
10  
11  
12  
13  
14  
15  
16  
17  
18  
19  
20  
21  
22  
23  
24  
25  
26  
27  
28  
29  
30  
31  
32

|                                               |             |     |     |       |
|-----------------------------------------------|-------------|-----|-----|-------|
| <i>Cardiac risk (p-value = &lt;0.001 ***)</i> |             |     |     |       |
| 0                                             | 487 (45.8%) | 372 | 114 | 23.5  |
| 1                                             | 349 (32.8%) | 238 | 110 | 31.6  |
| 2                                             | 169 (15.9%) | 106 | 61  | 36.5  |
| 3                                             | 44 (4.1%)   | 23  | 21  | 47.7  |
| 4                                             | 8 (0.8%)    | 5   | 3   | 37.5  |
| 5                                             | 1 (0.1%)    | 0   | 1   | 100.0 |
| Missing                                       | 5 (0.47%)   | 2   | 3   | 60.0  |
| <i>Time of diagnosis (p-value = 0.006 **)</i> |             |     |     |       |
| Post-op                                       | 733 (69%)   | 499 | 231 | 31.6  |
| Pre-op                                        | 266 (25%)   | 205 | 60  | 22.6  |
| Missing                                       | 64 (6.0%)   | 42  | 22  | 34.4  |
| <i>Diagnosis (p-value = 0.668)</i>            |             |     |     |       |
| Clinical                                      | 62 (5.8%)   | 42  | 20  | 32.3  |
| Swab                                          | 992 (93.3%) | 696 | 292 | 29.6  |
| Missing                                       |             |     |     |       |
| <i>Month (p-value = 0.007 **)</i>             |             |     |     |       |
| February                                      | 26 (2.4%)   | 23  | 3   | 11.5  |
| March                                         | 474 (44.6%) | 313 | 159 | 33.7  |
| April                                         | 558 (52.5%) | 406 | 150 | 27.0  |
| Missing                                       | 1(0.09%)    | 0   | 1   | 100.0 |

For peer review only

33  
34  
35  
36  
37  
38  
39  
40  
41  
42  
43  
44  
45  
46

**Table S2. Comorbidity data summaries by died (n = 313) and alive (n =746) groups. Data tabulated are counts, with estimated odds ratios (OR), with 95% confidence intervals, and p-values from Fisher’s exact tests for each comorbidity.**

| Comorbidity | Alive | Died | OR | p-value |
|-------------|-------|------|----|---------|
|-------------|-------|------|----|---------|



|                                                 | (n = 746)       | (n = 313)       | (95% CI)          |            |
|-------------------------------------------------|-----------------|-----------------|-------------------|------------|
|                                                 | Y:N (%Y)        | Y:N (%Y)        |                   |            |
| Current smoker                                  | 34:712 (4.6%)   | 9:304 (2.9%)    | 0.62 (0.26, 1.34) | 0.235 -    |
| Asthma                                          | 53:693 (7.1%)   | 21:292 (6.7%)   | 0.94 (0.53, 1.62) | 0.895 -    |
| Current cancer diagnosis                        | 57:689 (7.6%)   | 24:289 (7.7%)   | 1.00 (0.58, 1.68) | 0.999 -    |
| Chronic kidney disease (moderate/severe)        | 106:640 (14.2%) | 71:242 (22.7%)  | 1.77 (1.25, 2.51) | 0.001 **   |
| Chronic obstructive pulmonary disease (COPD)    | 95:651 (12.7%)  | 57:256 (18.2%)  | 1.53 (1.05, 2.21) | 0.027 *    |
| Congenital abnormality - cardiac                | 4:742 (0.5%)    | 1:312 (0.3%)    | 0.60 (0.01, 6.04) | 0.999 -    |
| Congenital abnormality - non-cardiac            | 0:746 (0.0%)    | 4:309 (1.3%)    | -                 | - -        |
| Congestive heart failure                        | 81:665 (10.9%)  | 58:255 (18.5%)  | 1.87 (1.27, 2.73) | <0.001 *** |
| Dementia                                        | 248:498 (33.2%) | 133:180 (42.5%) | 1.48 (1.12, 1.96) | 0.005 **   |
| Diabetes mellitus                               | 142:604 (19.0%) | 63:250 (20.1%)  | 1.07 (0.76, 1.51) | 0.671 -    |
| Hypertension                                    | 387:359 (51.9%) | 186:127 (59.4%) | 1.36 (1.03, 1.79) | 0.026 *    |
| Myocardial infarction or ischemic heart disease | 103:643 (13.8%) | 63:250 (20.1%)  | 1.57 (1.09, 2.25) | 0.012 *    |
| Peripheral vascular disease                     | 34:712 (4.6%)   | 21:292 (6.7%)   | 1.51 (0.82, 2.72) | 0.172 -    |
| Stroke/ TIA                                     | 107:639 (14.3%) | 57:256 (18.2%)  | 1.33 (0.92, 1.92) | 0.114 -    |
| Other (including other lung disease)            | 377:369 (50.5%) | 158:155 (50.5%) | 1.00 (0.76, 1.31) | 0.999 -    |

**Table S3. Diagnosis data summaries by died (n = 313) and alive (n =746) groups. Data tabulated are counts, with estimated odds ratios (OR), with 95% confidence intervals, and p-values from Fisher's exact tests for each diagnosis method.**

| Diagnosis                                | Alive<br>(n = 746) | Died<br>(n = 313) | OR<br>(95% CI)    | p-value |
|------------------------------------------|--------------------|-------------------|-------------------|---------|
|                                          | Y:N (%Y)           | Y:N (%Y)          |                   |         |
| <i>Pre-op 4-7days</i>                    |                    |                   |                   |         |
| CT thorax scan (negative for SARS-CoV-2) | 10:736 (1.3%)      | 2:311 (0.6%)      | 0.47 (0.05, 2.24) | 0.526 - |



|                                           |                 |                 |                   |        |   |
|-------------------------------------------|-----------------|-----------------|-------------------|--------|---|
| CT thorax scan (positive for SARS-CoV-2)  | 12:734 (1.6%)   | 0:313 (0%)      | 0.00 (0.00, 0.85) | 0.023  | * |
| Swab (negative for SARS-CoV-2)            | 17:729 (2.3%)   | 3:310 (1%)      | 0.42 (0.08, 1.45) | 0.215  | - |
| Swab (positive for SARS-CoV-2)            | 31:715 (4.2%)   | 8:305 (2.6%)    | 0.61 (0.24, 1.37) | 0.283  | - |
| <i>Pre-op 1-3days</i>                     |                 |                 |                   |        |   |
| CT thorax scan (negative for SARS-CoV-2)  | 8:738 (1.1%)    | 3:310 (1%)      | 0.89 (0.15, 3.75) | 0.999  | - |
| CT thorax scan (positive for SARS-CoV-2)  | 10:736 (1.3%)   | 3:310 (1%)      | 0.71 (0.13, 2.79) | 0.765  | - |
| Swab (negative for SARS-CoV-2)            | 41:705 (5.5%)   | 9:304 (2.9%)    | 0.51 (0.22, 1.08) | 0.080  | - |
| Swab (positive for SARS-CoV-2)            | 86:660 (11.5%)  | 15:298 (4.8%)   | 0.39 (0.20, 0.69) | <0.001 | * |
| <i>Pre-op surgery</i>                     |                 |                 |                   |        |   |
| CT thorax scan (negative for SARS-CoV-2)  | 0:746 (0%)      | 0:313 (0%)      | -                 | 0.999  | - |
| CT thorax scan (positive for SARS-CoV-2)  | 4:742 (0.5%)    | 0:313 (0%)      | 0.00 (0.00, 3.61) | 0.326  | - |
| Swab (negative for SARS-CoV-2)            | 13:733 (1.7%)   | 2:311 (0.6%)    | 0.36 (0.04, 1.62) | 0.254  | - |
| Swab (positive for SARS-CoV-2)            | 18:728 (2.4%)   | 7:306 (2.2%)    | 0.93 (0.32, 2.35) | 1      | - |
| <i>Post-op Admission</i>                  |                 |                 |                   |        |   |
| CT thorax scan (negative for SARS-CoV-2)  | 4:742 (0.5%)    | 1:312 (0.3%)    | 0.60 (0.01, 6.04) | 0.999  | - |
| CT thorax scan (positive for SARS-CoV-2)  | 8:738 (1.1%)    | 4:309 (1.3%)    | 1.19 (0.26, 4.50) | 0.756  | - |
| Swab (negative for SARS-CoV-2)            | 51:695 (6.8%)   | 12:301 (3.8%)   | 0.54 (0.26, 1.05) | 0.064  | - |
| Swab (positive for SARS-CoV-2)            | 317:429 (42.5%) | 143:170 (45.7%) | 1.14 (0.87, 1.50) | 0.342  | - |
| <i>Discharge 30days</i>                   |                 |                 |                   |        |   |
| CT thorax scan (negative for SARS-CoV-2)  | 4:742 (0.5%)    | 0:313 (0%)      | 0.00 (0.00, 3.61) | 0.326  | - |
| CT thorax scan (positive for SARS-CoV-2)  | 0:746 (0%)      | 1:312 (0.3%)    | -                 | -      | - |
| Swab (negative for SARS-CoV-2)            | 8:738 (1.1%)    | 0:313 (0%)      | 0.00 (0.00, 1.39) | 0.114  | - |
| Swab (positive for SARS-CoV-2)            | 75:671 (10.1%)  | 27:286 (8.6%)   | 0.85 (0.51, 1.36) | 0.496  | - |
| <i>Diagnosis</i>                          |                 |                 |                   |        |   |
| Positive SARS-CoV-2 swab - before surgery | 122:624 (16.4%) | 31:282 (9.9%)   | 0.56 (0.36, 0.86) | 0.007  | * |
| Positive SARS-CoV-2 swab - after surgery  | 409:337 (54.8%) | 177:136 (56.5%) | 1.07 (0.82, 1.41) | 0.636  | - |

|                                                                      |               |               |                   |       |   |
|----------------------------------------------------------------------|---------------|---------------|-------------------|-------|---|
| CT scan of the chest confirming SARS-CoV-2 - before surgery          | 20:726 (2.7%) | 2:311 (0.6%)  | 0.23 (0.03, 0.97) | 0.033 | * |
| CT scan of the chest confirming SARS-CoV-2 - after surgery           | 9:737 (1.2%)  | 5:308 (1.6%)  | 1.33 (0.35, 4.46) | 0.569 | - |
| Clinical diagnosis or chest x-ray - suspected before time of surgery | 39:707 (5.2%) | 12:301 (3.8%) | 0.72 (0.34, 1.43) | 0.432 | - |
| Clinical diagnosis or chest x-ray - suspected after time of surgery  | 67:679 (9%)   | 31:282 (9.9%) | 1.11 (0.69, 1.77) | 0.643 | - |

**Table S4. SARS-CoV-2 symptoms data summaries by died (n = 313) and alive (n =746) groups. Data tabulated are counts, with estimated odds ratios (OR), with 95% confidence intervals, and p-values from Fisher's exact tests for each symptom.**

| Symptom                   | Alive<br>(n = 746)<br>Y:N (%Y) | Died<br>(n = 313)<br>Y:N (%Y) | OR<br>(95% CI)    | p-value |
|---------------------------|--------------------------------|-------------------------------|-------------------|---------|
| Abdominal pain            | 11:735 (1.5%)                  | 1:312 (0.3%)                  | 0.21 (0.01, 1.49) | 0.124 - |
| Breathlessness (dyspnoea) | 54:692 (7.2%)                  | 31:282 (9.9%)                 | 1.41 (0.86, 2.28) | 0.172 - |
| Cough                     | 73:673 (9.8%)                  | 35:278 (11.2%)                | 1.16 (0.73, 1.81) | 0.505 - |
| Diarrhoea                 | 8:738 (1.1%)                   | 1:312 (0.3%)                  | 0.30 (0.01, 2.22) | 0.295 - |
| Fatigue                   | 21:725 (2.8%)                  | 10:303 (3.2%)                 | 1.14 (0.47, 2.56) | 0.695 - |
| Fever (>38 celsius)       | 61:685 (8.2%)                  | 25:288 (8%)                   | 0.98 (0.57, 1.61) | 0.999 - |
| Haemoptysis               | 0:746 (0.0%)                   | 0:313 (0.0%)                  | -                 | - -     |
| Myalgia                   | 10:736 (1.3%)                  | 3:310 (1%)                    | 0.71 (0.13, 2.79) | 0.765 - |
| Nausea/vomiting           | 13:733 (1.7%)                  | 7:306 (2.2%)                  | 1.29 (0.43, 3.52) | 0.623 - |
| Sputum                    | 8:738 (1.1%)                   | 4:309 (1.3%)                  | 1.19 (0.26, 4.50) | 0.756 - |
| Other                     | 311:435 (41.7%)                | 136:177 (43.5%)               | 1.08 (0.82, 1.42) | 0.633 - |

**Table S5. Pre-surgery measures data (n, mean and sd) for the full study population (n = 1063), and died (n = 313) and alive (n =746) groups, and the difference in means between groups, with 95% confidence interval, and p-values from unpaired t-tests.**

28

| Measure                               | Full<br>(n = 1063) |                | Alive<br>(n = 746) |                | Died<br>(n = 313) |                | Difference (95%CI)   | p-value |
|---------------------------------------|--------------------|----------------|--------------------|----------------|-------------------|----------------|----------------------|---------|
|                                       | n                  | Mean (SD)      | n                  | Mean (SD)      | n                 | Mean (SD)      |                      |         |
| Respiratory rate (breaths/minute)     | 996                | 17.75 (3.52)   | 706                | 17.65 (3.68)   | 289               | 18.02 (3.09)   | -0.37 (-0.85, 0.11)  | 0.132   |
| Heart rate (bpm)                      | 1022               | 81.10 (14.63)  | 723                | 81.16 (14.59)  | 298               | 80.95 (14.77)  | 0.22 (-1.76, 2.20)   | 0.830   |
| Systolic blood pressure (mmHg)        | 1023               | 138.15 (26.04) | 724                | 138.33 (25.85) | 298               | 137.61 (26.53) | 0.72 (-2.80, 4.24)   | 0.687   |
| Diastolic blood pressure (mmHg)       | 1021               | 72.97 (13.89)  | 723                | 73.07 (13.86)  | 297               | 72.70 (14.00)  | 0.37 (-1.52, 2.25)   | 0.703   |
| Haemoglobin (g/L)                     | 1062               | 117.94 (19.22) | 745                | 118.35 (19.21) | 313               | 116.93 (19.26) | 1.41 (-1.13, 3.95)   | 0.276   |
| White cell count (10 <sup>9</sup> /L) | 1060               | 10.33 (4.26)   | 744                | 10.33 (4.36)   | 313               | 10.34 (4.04)   | -0.01 (-0.57, 0.56)  | 0.976   |
| C-reactive protein (mg/L)             | 738                | 54.70 (66.26)  | 514                | 54.84 (67.68)  | 221               | 54.63 (63.34)  | 0.21 (-10.28, 10.70) | 0.969   |

29

30

31

32

33

**Table S6. Operation details for the full study population (n = 1063), and died (n = 313) and alive (n = 746) groups; p-values are for Fisher's exact tests comparing groups for each characteristic.**

| Characteristic                                | Full<br>(n = 1063) | Alive<br>(n = 746) | Died<br>(n = 313) | Died (%) |
|-----------------------------------------------|--------------------|--------------------|-------------------|----------|
| <i>Anaesthesia (p-value = 0.787)</i>          |                    |                    |                   |          |
| General                                       | 527 (49.6%)        | 368                | 157               | 29.9     |
| Regional                                      | 524 (49.3%)        | 372                | 152               | 29.0     |
| Missing                                       | 12 (27.8%)         | 6                  | 4                 | 33.3     |
| <i>Pre-op respiration (p-value = 0.031 *)</i> |                    |                    |                   |          |
| None                                          | 714 (67.2%)        | 520                | 194               | 27.2     |
| Oxygen                                        | 336 (31.6%)        | 220                | 115               | 34.3     |
| Ventilated                                    | 2 (0.2%)           | 2                  | 0                 | 0.0      |
| Missing                                       | 11(1.03%)          | 4                  | 4                 | 36.4     |
| <i>Pre-op delay (p-value = 0.220)</i>         |                    |                    |                   |          |

|                                                                         |             |     |     |      |
|-------------------------------------------------------------------------|-------------|-----|-----|------|
| < 6 hours                                                               | 16 (1.5%)   | 11  | 5   | 31.2 |
| 6-23 hours                                                              | 322 (30.3%) | 232 | 88  | 27.5 |
| 24-47 hours                                                             | 224 (21.1%) | 147 | 77  | 34.4 |
| 48-71 hours                                                             | 82 (7.7%)   | 61  | 21  | 25.6 |
| 72+ hours                                                               | 123 (11.6%) | 94  | 29  | 23.6 |
| Missing                                                                 | 296 (27.8%) | 201 | 93  | 31.4 |
| <i>Procedure (p-value = 0.015 *)</i>                                    |             |     |     |      |
| LIMB - lower limb - total hip replacement                               | 45 (4.2%)   | 41  | 4   | 8.9  |
| LIMB - lower limb fracture - Cannulated Screws                          | 5 (0.5%)    | 5   | 0   | 0.0  |
| LIMB - lower limb fracture - Reduction and Internal Fixation            | 15 (1.4%)   | 10  | 5   | 33.3 |
| LIMB - lower limb fracture - Dynamic Hip Screw                          | 276 (26%)   | 195 | 81  | 29.3 |
| LIMB - lower limb fracture - Reduction and Intramedullary Fixation      | 243 (22.9%) | 169 | 73  | 30.2 |
| LIMB - lower limb fracture - Partial Hip Replacement (Hemiarthroplasty) | 479 (45.1%) | 326 | 150 | 31.5 |
| Missing                                                                 | 0 (0.0%)    | 0   | 0   | 0.0  |

**Figure S1. Boxplots showing distributions of pre-surgery measures by outcome status (died or alive). Boxes show interquartile range (IQR), bars medians and whiskers are 1.5 times IQR.**

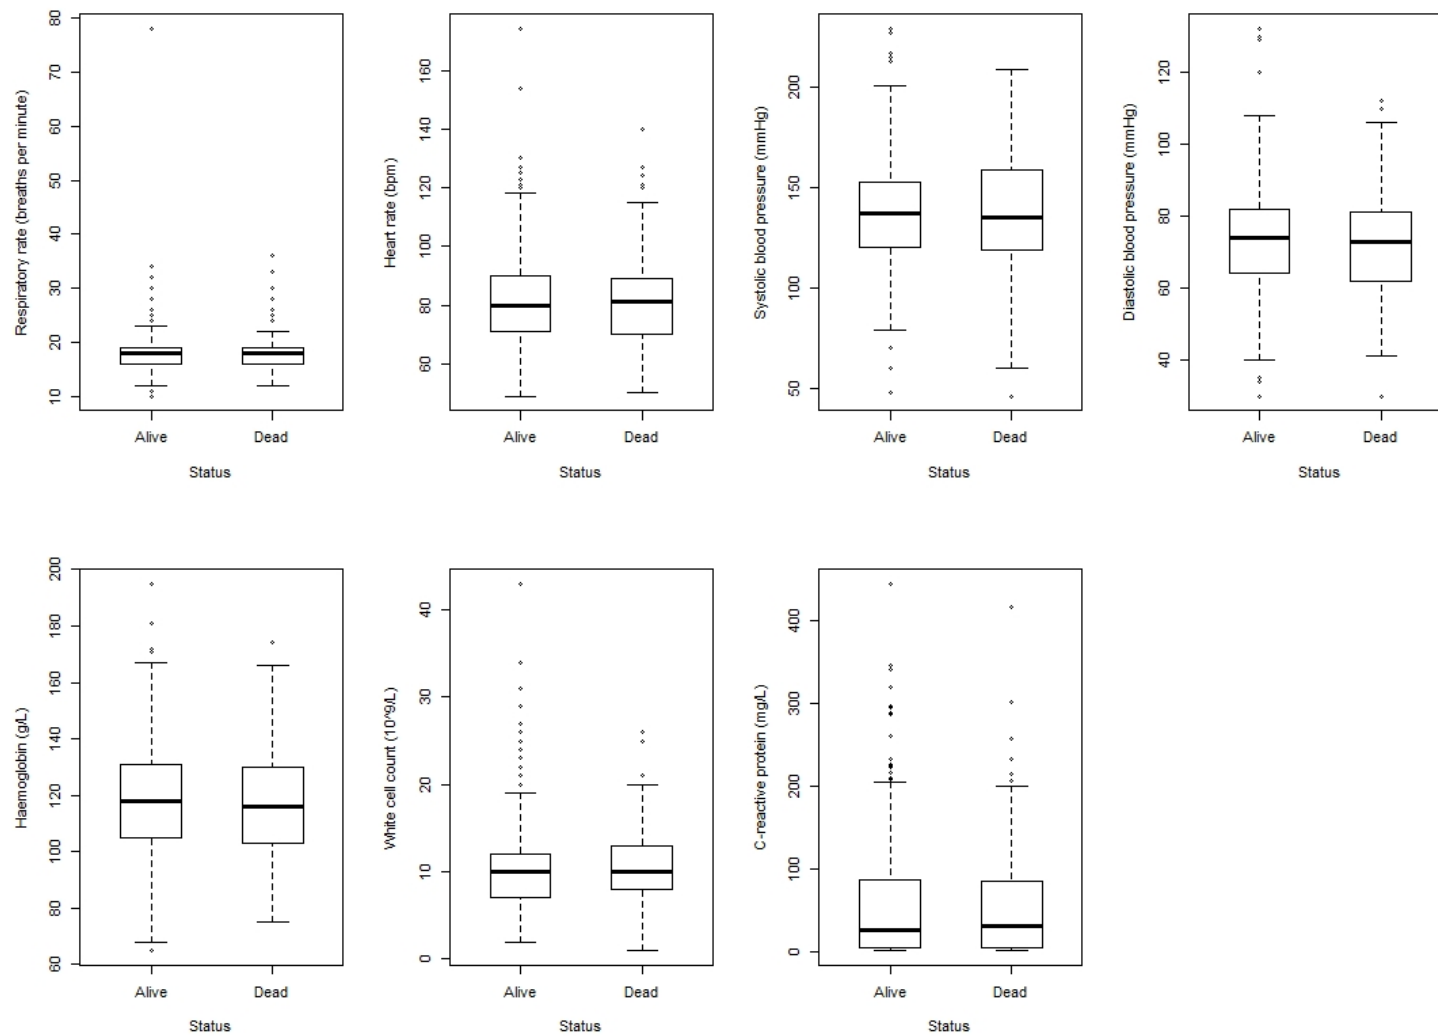

44

1  
2  
3  
4  
5  
6  
7  
8  
9  
10  
11  
12  
13  
14  
15  
16  
17  
18  
19  
20  
21  
22  
23  
24  
25  
26  
27  
28  
29  
30  
31  
32  
33  
34  
35  
36  
37  
38  
39  
40  
41  
42  
43  
44  
45  
46

For peer review only

STROBE Statement—Checklist of items that should be included in reports of *cohort studies*

|                           | Item No | Recommendation                                                                                                                                                                                                                                                                                                         | Page No |
|---------------------------|---------|------------------------------------------------------------------------------------------------------------------------------------------------------------------------------------------------------------------------------------------------------------------------------------------------------------------------|---------|
| <b>Title and abstract</b> | 1       | (a) Indicate the study's design with a commonly used term in the title or the abstract<br>(b) Provide in the abstract an informative and balanced summary of what was done and what was found                                                                                                                          | 1 & 2   |
| <b>Introduction</b>       |         |                                                                                                                                                                                                                                                                                                                        |         |
| Background/rationale      | 2       | Explain the scientific background and rationale for the investigation being reported                                                                                                                                                                                                                                   | 3       |
| Objectives                | 3       | State specific objectives, including any prespecified hypotheses                                                                                                                                                                                                                                                       | 4       |
| <b>Methods</b>            |         |                                                                                                                                                                                                                                                                                                                        |         |
| Study design              | 4       | Present key elements of study design early in the paper                                                                                                                                                                                                                                                                | 5       |
| Setting                   | 5       | Describe the setting, locations, and relevant dates, including periods of recruitment, exposure, follow-up, and data collection                                                                                                                                                                                        | 5       |
| Participants              | 6       | (a) Give the eligibility criteria, and the sources and methods of selection of participants. Describe methods of follow-up<br>(b) For matched studies, give matching criteria and number of exposed and unexposed                                                                                                      | 6       |
| Variables                 | 7       | Clearly define all outcomes, exposures, predictors, potential confounders, and effect modifiers. Give diagnostic criteria, if applicable                                                                                                                                                                               | 7       |
| Data sources/measurement  | 8*      | For each variable of interest, give sources of data and details of methods of assessment (measurement). Describe comparability of assessment methods if there is more than one group                                                                                                                                   | 6       |
| Bias                      | 9       | Describe any efforts to address potential sources of bias                                                                                                                                                                                                                                                              | 8       |
| Study size                | 10      | Explain how the study size was arrived at                                                                                                                                                                                                                                                                              | N/A     |
| Quantitative variables    | 11      | Explain how quantitative variables were handled in the analyses. If applicable, describe which groupings were chosen and why                                                                                                                                                                                           | 8       |
| Statistical methods       | 12      | (a) Describe all statistical methods, including those used to control for confounding<br>(b) Describe any methods used to examine subgroups and interactions<br>(c) Explain how missing data were addressed<br>(d) If applicable, explain how loss to follow-up was addressed<br>(e) Describe any sensitivity analyses | 8       |
| <b>Results</b>            |         |                                                                                                                                                                                                                                                                                                                        |         |
| Participants              | 13*     | (a) Report numbers of individuals at each stage of study—eg numbers potentially eligible, examined for eligibility, confirmed eligible, included in the study, completing follow-up, and analysed<br>(b) Give reasons for non-participation at each stage<br>(c) Consider use of a flow diagram                        | 9       |
| Descriptive data          | 14*     | (a) Give characteristics of study participants (eg demographic, clinical, social) and information on exposures and potential confounders<br>(b) Indicate number of participants with missing data for each variable of interest<br>(c) Summarise follow-up time (eg, average and total amount)                         | 9       |
| Outcome data              | 15*     | Report numbers of outcome events or summary measures over time                                                                                                                                                                                                                                                         | 9       |

|    |                          |    |                                                                                                                                                                                                              |       |
|----|--------------------------|----|--------------------------------------------------------------------------------------------------------------------------------------------------------------------------------------------------------------|-------|
| 1  | Main results             | 16 | (a) Give unadjusted estimates and, if applicable, confounder-adjusted estimates and their precision (eg, 95% confidence interval). Make clear which confounders were adjusted for and why they were included | 9-12  |
| 2  |                          |    | (b) Report category boundaries when continuous variables were categorized                                                                                                                                    |       |
| 3  |                          |    | (c) If relevant, consider translating estimates of relative risk into absolute risk for a meaningful time period                                                                                             |       |
| 4  |                          |    |                                                                                                                                                                                                              |       |
| 5  |                          |    |                                                                                                                                                                                                              |       |
| 6  |                          |    |                                                                                                                                                                                                              |       |
| 7  |                          |    |                                                                                                                                                                                                              |       |
| 8  |                          |    |                                                                                                                                                                                                              |       |
| 9  | Other analyses           | 17 | Report other analyses done—eg analyses of subgroups and interactions, and sensitivity analyses                                                                                                               | 9-12  |
| 10 |                          |    |                                                                                                                                                                                                              |       |
| 11 | <b>Discussion</b>        |    |                                                                                                                                                                                                              |       |
| 12 |                          |    |                                                                                                                                                                                                              |       |
| 13 | Key results              | 18 | Summarise key results with reference to study objectives                                                                                                                                                     | 13    |
| 14 | Limitations              | 19 | Discuss limitations of the study, taking into account sources of potential bias or imprecision. Discuss both direction and magnitude of any potential bias                                                   | 16    |
| 15 |                          |    |                                                                                                                                                                                                              |       |
| 16 | Interpretation           | 20 | Give a cautious overall interpretation of results considering objectives, limitations, multiplicity of analyses, results from similar studies, and other relevant evidence                                   | 13-15 |
| 17 |                          |    |                                                                                                                                                                                                              |       |
| 18 | Generalisability         | 21 | Discuss the generalisability (external validity) of the study results                                                                                                                                        | 13-15 |
| 19 |                          |    |                                                                                                                                                                                                              |       |
| 20 |                          |    |                                                                                                                                                                                                              |       |
| 21 | <b>Other information</b> |    |                                                                                                                                                                                                              |       |
| 22 |                          |    |                                                                                                                                                                                                              |       |
| 23 | Funding                  | 22 | Give the source of funding and the role of the funders for the present study and, if applicable, for the original study on which the present article is based                                                | 1     |
| 24 |                          |    |                                                                                                                                                                                                              |       |

\*Give information separately for exposed and unexposed groups.

**Note:** An Explanation and Elaboration article discusses each checklist item and gives methodological background and published examples of transparent reporting. The STROBE checklist is best used in conjunction with this article (freely available on the Web sites of PLoS Medicine at <http://www.plosmedicine.org/>, Annals of Internal Medicine at <http://www.annals.org/>, and Epidemiology at <http://www.epidem.com/>). Information on the STROBE Initiative is available at <http://www.strobe-statement.org>.
